# Supplementary material for: The regulation of hsacirc_004413 promotes proliferation and drug resistance of gastric cancer cells by acting as a competing endogenous RNA for miR-145-5p
Source: PeerJ. 2022 Apr 7;10:e12629. doi: 10.7717/peerj.12629 (PMC8995023; doi:10.7717/peerj.12629)
Supplement: Supplemental Information 3 [file peerj-10-12629-s003.xlsx]

## Sheet: Sheet1
gene_id	SGC_7901_vs_SGC_7901_5Fu_de	SGC_7901_vs_SGC_7901_5Fu_log2fc	SGC_7901_vs_SGC_7901_5Fu_pval
hsacirc_000002	-	1.16993	0.9066
hsacirc_000006	-	-Inf	0.892474
hsacirc_000008	-	-0.736966	0.857153
hsacirc_000011	-	-Inf	0.635054
hsacirc_000021	-	-2	0.543231
hsacirc_000024	-	-2.91754	0.434517
hsacirc_000031	-	-Inf	0.568974
hsacirc_000032	-	-Inf	0.514828
hsacirc_000034	-	-Inf	0.713286
hsacirc_000039	-	-Inf	0.796896
hsacirc_000041	-	0.169925	1
hsacirc_000055	-	-1.53051	0.707156
hsacirc_000059	-	Inf	0.0640385
hsacirc_000070	-	0.511541	0.772551
hsacirc_000073	-	-Inf	0.371575
hsacirc_000084	-	0.169925	1
hsacirc_000087	-	-Inf	0.635054
hsacirc_000089	-	-3	0.408433
hsacirc_000090	-	-Inf	0.371575
hsacirc_000101	-	0.584963	1
hsacirc_000103	-	-0.567041	0.868668
hsacirc_000104	-	2.30282	0.230938
hsacirc_000106	-	0.111031	0.979306
hsacirc_000107	-	Inf	0.193642
hsacirc_000122	-	-4.11548	0.124043
hsacirc_000124	-	-Inf	0.470422
hsacirc_000129	-	-Inf	0.892474
hsacirc_000130	-	-0.152003	1
hsacirc_000133	-	1.16993	0.9066
hsacirc_000134	-	0.169925	1
hsacirc_000135	-	-0.152003	1
hsacirc_000141	-	1.58496	0.701108
hsacirc_000144	-	-0.152003	1
hsacirc_000155	-	-0.192645	1
hsacirc_000156	-	-1.41504	0.745772
hsacirc_000169	-	-0.152003	1
hsacirc_000171	-	-Inf	0.713286
hsacirc_000172	-	-Inf	0.796896
hsacirc_000180	-	-0.415037	1
hsacirc_000182	-	-3.91754	0.157661
hsacirc_000183	-	4.97728	0.0740866
hsacirc_000187	-	0.169925	1
hsacirc_000191	-	1.16993	0.717593
hsacirc_000199	-	-0.830075	0.924844
hsacirc_000212	-	-1.078	0.726817
hsacirc_000230	-	-Inf	0.514828
hsacirc_000242	-	-Inf	0.635054
hsacirc_000243	-	-Inf	0.432801
hsacirc_000245	-	-Inf	0.713286
hsacirc_000246	-	-0.567041	0.953174
hsacirc_000254	-	-0.830075	1
hsacirc_000261	-	-0.415037	1
hsacirc_000266	-	0.169925	1
hsacirc_000267	-	-Inf	0.796896
hsacirc_000269	-	-0.415037	1
hsacirc_000270	-	-Inf	0.346852
hsacirc_000273	-	-1.41504	0.468359
hsacirc_000274	-	-1.63743	0.813453
hsacirc_000277	-	0.169925	1
hsacirc_000280	-	-1.41504	0.461499
hsacirc_000282	-	-Inf	0.568974
hsacirc_000303	-	0.169925	1
hsacirc_000305	-	-0.704544	0.909021
hsacirc_000306	-	-Inf	0.713286
hsacirc_000310	-	-Inf	0.635054
hsacirc_000312	-	-0.415037	0.971059
hsacirc_000319	-	0.584963	0.809518
hsacirc_000322	-	-0.830075	1
hsacirc_000334	-	-2	0.435935
hsacirc_000337	-	-Inf	0.713286
hsacirc_000346	-	-Inf	0.20562
hsacirc_000348	-	-Inf	0.635054
hsacirc_000351	-	-0.245112	1
hsacirc_000352	-	-Inf	0.892474
hsacirc_000353	-	-Inf	0.635054
hsacirc_000354	-	-Inf	0.371575
hsacirc_000355	-	-0.415037	1
hsacirc_000359	-	1.16993	0.9066
hsacirc_000365	-	-Inf	0.892474
hsacirc_000368	-	1.16993	0.9066
hsacirc_000381	-	-Inf	0.635054
hsacirc_000388	-	-Inf	0.568974
hsacirc_000391	-	-0.714598	0.738282
hsacirc_000402	-	-Inf	0.892474
hsacirc_000407	-	3.16993	0.310363
hsacirc_000413	-	-1.91754	0.572519
hsacirc_000414	-	-Inf	0.796896
hsacirc_000415	-	2.16993	0.777742
hsacirc_000422	-	-1.41504	0.745772
hsacirc_000429	-	-Inf	0.635054
hsacirc_000441	-	-Inf	0.176772
hsacirc_000453	-	-1.09311	0.679474
hsacirc_000458	-	0.584963	0.917795
hsacirc_000459	-	1.43296	0.658808
hsacirc_000461	-	0.807355	0.666889
hsacirc_000466	-	1.90689	0.445884
hsacirc_000467	-	-2.43888	0.230133
hsacirc_000475	-	-Inf	0.346852
hsacirc_000479	-	-Inf	0.892474
hsacirc_000481	-	-Inf	0.796896
hsacirc_000482	-	-2.05247	0.417368
hsacirc_000483	-	-Inf	0.892474
hsacirc_000484	-	-Inf	0.796896
hsacirc_000492	-	-0.704544	0.729748
hsacirc_000493	-	-Inf	0.568974
hsacirc_000494	-	Inf	0.0801625
hsacirc_000495	-	2.16993	0.777742
hsacirc_000496	-	-Inf	0.796896
hsacirc_000497	-	Inf	0.403375
hsacirc_000498	-	-0.415037	1
hsacirc_000499	-	-Inf	0.635054
hsacirc_000503	-	Inf	0.300267
hsacirc_000504	-	Inf	0.236584
hsacirc_000505	-	0.432959	0.986521
hsacirc_000508	-	Inf	0.193642
hsacirc_000512	-	-Inf	0.796896
hsacirc_000522	-	-Inf	0.635054
hsacirc_000523	-	0.36257	0.973368
hsacirc_000544	-	0.169925	1
hsacirc_000546	-	-Inf	0.514828
hsacirc_000550	-	-0.830075	1
hsacirc_000559	-	-2.078	0.355847
hsacirc_000561	-	1.90689	0.603495
hsacirc_000562	-	-Inf	0.470422
hsacirc_000565	-	1.16993	0.9066
hsacirc_000568	-	-1.53051	0.707156
hsacirc_000577	-	-Inf	0.796896
hsacirc_000580	-	1.79796	0.377528
hsacirc_000586	-	-Inf	0.432801
hsacirc_000587	-	0.295456	0.955791
hsacirc_000588	-	-3.12776	0.110592
hsacirc_000592	-	-Inf	0.635054
hsacirc_000594	-	-0.567041	0.868668
hsacirc_000603	-	2	0.339583
hsacirc_000608	-	-Inf	0.514828
hsacirc_000613	-	1.16993	0.9066
hsacirc_000618	-	Inf	0.300267
hsacirc_000627	-	-Inf	0.796896
hsacirc_000632	-	-0.63743	0.980625
hsacirc_000633	-	-Inf	0.635054
hsacirc_000650	-	-Inf	0.514828
hsacirc_000652	-	-Inf	0.432801
hsacirc_000655	-	3.20343e-16	1
hsacirc_000659	-	-0.830075	1
hsacirc_000670	-	-Inf	0.371575
hsacirc_000672	-	-Inf	0.568974
hsacirc_000675	-	-Inf	0.324023
hsacirc_000679	-	-1.03171	0.621395
hsacirc_000682	-	-1.22239	0.66946
hsacirc_000684	-	-Inf	0.371575
hsacirc_000687	-	1.75489	0.72648
hsacirc_000688	-	-Inf	0.432801
hsacirc_000689	-	-Inf	0.713286
hsacirc_000694	-	1.75489	0.72648
hsacirc_000695	-	-Inf	0.324023
hsacirc_000714	-	-Inf	0.892474
hsacirc_000715	-	-2.407	0.205297
hsacirc_000716	-	-Inf	0.796896
hsacirc_000718	-	-Inf	0.568974
hsacirc_000721	-	-Inf	0.371575
hsacirc_000722	-	1.16993	0.664791
hsacirc_000727	-	-1.53051	0.707156
hsacirc_000728	-	-1.45457	0.510397
hsacirc_000737	-	-Inf	0.514828
hsacirc_000743	-	-Inf	0.713286
hsacirc_000750	-	-Inf	0.892474
hsacirc_000752	-	-1.83007	0.603211
hsacirc_000770	-	-Inf	0.470422
hsacirc_000775	-	-Inf	0.514828
hsacirc_000783	-	-Inf	0.796896
hsacirc_000786	-	-Inf	0.796896
hsacirc_000790	-	-0.736966	0.857153
hsacirc_000792	-	0.36257	0.973368
hsacirc_000796	-	0.584963	0.917795
hsacirc_000801	-	-Inf	0.346852
hsacirc_000818	-	-Inf	0.892474
hsacirc_000819	-	-Inf	0.371575
hsacirc_000820	-	-Inf	0.346852
hsacirc_000822	-	-Inf	0.796896
hsacirc_000824	-	-0.289507	0.956876
hsacirc_000825	-	-0.245112	1
hsacirc_000827	-	0.169925	1
hsacirc_000828	-	-2.87447	0.254207
hsacirc_000843	-	-0.245112	0.951793
hsacirc_000846	-	1.65535	0.579545
hsacirc_000856	-	0.169925	1
hsacirc_000858	-	0.113341	0.953401
hsacirc_000864	-	-Inf	0.796896
hsacirc_000866	-	0.169925	1
hsacirc_000870	-	-Inf	0.796896
hsacirc_000871	-	1.16993	0.9066
hsacirc_000881	-	-0.678072	0.847625
hsacirc_000884	-	Inf	0.193642
hsacirc_000887	-	1.75489	0.593976
hsacirc_000890	-	-Inf	0.635054
hsacirc_000892	-	-0.830075	0.924844
hsacirc_000895	-	0.754888	0.674187
hsacirc_000905	-	-Inf	0.514828
hsacirc_000912	-	-Inf	0.635054
hsacirc_000918	-	1.16993	0.9066
hsacirc_000921	-	-0.830075	1
hsacirc_000922	-	-Inf	0.568974
hsacirc_000929	-	-Inf	0.713286
hsacirc_000938	-	-Inf	0.713286
hsacirc_000939	-	2.16993	0.600621
hsacirc_000948	-	-Inf	0.302187
hsacirc_000954	-	-Inf	0.796896
hsacirc_000966	-	-Inf	0.635054
hsacirc_000968	-	Inf	0.125849
hsacirc_000972	-	0.169925	1
hsacirc_000978	-	-Inf	0.796896
hsacirc_000981	-	-0.830075	0.924844
hsacirc_000982	-	Inf	0.403375
hsacirc_000993	-	0.432959	0.986521
hsacirc_000999	-	-Inf	0.20562
hsacirc_001008	-	-0.415037	1
hsacirc_001013	-	-Inf	0.713286
hsacirc_001016	-	0.169925	1
hsacirc_001017	-	-0.344648	0.944174
hsacirc_001024	-	-0.0421255	1
hsacirc_001025	-	-1.83007	0.603211
hsacirc_001027	-	-0.152003	1
hsacirc_001035	-	-1.152	0.828966
hsacirc_001037	-	0.754888	0.914553
hsacirc_001048	-	-2.35364	0.275895
hsacirc_001049	-	2.75489	0.593691
hsacirc_001054	-	-0.59561	0.879911
hsacirc_001059	-	-Inf	0.796896
hsacirc_001060	-	-3.41504	0.281853
hsacirc_001061	-	-1.152	0.948859
hsacirc_001072	-	-Inf	0.796896
hsacirc_001074	-	-Inf	0.892474
hsacirc_001081	-	3.49185	0.391448
hsacirc_001084	-	-Inf	0.514828
hsacirc_001086	-	-Inf	0.568974
hsacirc_001100	-	-0.0740006	0.99887
hsacirc_001101	-	-Inf	0.635054
hsacirc_001113	-	2.16993	0.600621
hsacirc_001116	-	1.75489	0.72648
hsacirc_001119	-	0.704261	0.707177
hsacirc_001121	-	-1.41504	0.876365
hsacirc_001126	-	-Inf	0.163716
hsacirc_001139	-	-Inf	0.432801
hsacirc_001144	-	-Inf	0.514828
hsacirc_001152	down	-Inf	0.0470611
hsacirc_001157	-	-Inf	0.514828
hsacirc_001160	-	Inf	0.193642
hsacirc_001173	-	1.16993	0.784571
hsacirc_001178	-	-Inf	0.346852
hsacirc_001187	-	-Inf	0.713286
hsacirc_001195	-	-1	0.87476
hsacirc_001198	-	2.16993	0.600621
hsacirc_001213	-	-Inf	0.568974
hsacirc_001214	-	0.794416	0.654021
hsacirc_001218	-	0.169925	1
hsacirc_001220	-	-Inf	0.470422
hsacirc_001223	-	-Inf	0.346852
hsacirc_001226	-	0.169925	1
hsacirc_001227	-	-0.415037	1
hsacirc_001229	-	-Inf	0.713286
hsacirc_001243	-	1.16993	0.717593
hsacirc_001260	-	0.169925	1
hsacirc_001268	-	0.584963	1
hsacirc_001276	-	-0.415037	1
hsacirc_001278	-	-Inf	0.635054
hsacirc_001284	-	-Inf	0.346852
hsacirc_001289	-	-Inf	0.514828
hsacirc_001294	-	1.16993	0.9066
hsacirc_001296	-	3.16993	0.474514
hsacirc_001297	-	0.169925	1
hsacirc_001299	-	-Inf	0.190649
hsacirc_001304	-	-1.32193	0.5264
hsacirc_001306	-	-1.14042	0.548693
hsacirc_001309	-	-Inf	0.892474
hsacirc_001311	-	3.16993	0.474514
hsacirc_001320	-	-Inf	0.713286
hsacirc_001324	-	0.584963	0.917795
hsacirc_001325	-	-Inf	0.635054
hsacirc_001327	-	-Inf	0.635054
hsacirc_001334	-	2.16993	0.600621
hsacirc_001344	-	0.169925	1
hsacirc_001345	-	0.629357	0.735152
hsacirc_001346	-	-Inf	0.222131
hsacirc_001348	-	-Inf	0.399736
hsacirc_001351	-	-Inf	0.713286
hsacirc_001359	-	0.169925	1
hsacirc_001362	-	2.16993	0.600621
hsacirc_001363	-	1.16993	0.9066
hsacirc_001366	down	-Inf	0.0310216
hsacirc_001368	-	1.16993	0.9066
hsacirc_001371	-	2.16993	0.777742
hsacirc_001372	-	-Inf	0.432801
hsacirc_001376	-	-Inf	0.0842941
hsacirc_001377	-	-1.35364	0.514306
hsacirc_001381	-	-0.72316	0.713788
hsacirc_001382	-	-Inf	0.568974
hsacirc_001387	-	-Inf	0.120959
hsacirc_001392	-	-Inf	0.432801
hsacirc_001397	-	1.16993	0.9066
hsacirc_001401	-	-1.11958	0.594676
hsacirc_001404	-	-0.415037	1
hsacirc_001406	-	0.169925	1
hsacirc_001414	-	-Inf	0.796896
hsacirc_001428	-	-Inf	0.371575
hsacirc_001429	-	-1.152	0.948859
hsacirc_001442	-	-Inf	0.796896
hsacirc_001445	-	0.169925	1
hsacirc_001458	-	Inf	0.300267
hsacirc_001466	-	-0.917538	0.690219
hsacirc_001473	-	-0.152003	1
hsacirc_001475	-	-1.152	0.697533
hsacirc_001479	-	-Inf	0.470422
hsacirc_001481	-	-1.91754	0.407867
hsacirc_001486	-	0.169925	1
hsacirc_001497	-	1.16993	0.9066
hsacirc_001503	-	-0.567041	0.953174
hsacirc_001504	-	2.16993	0.600621
hsacirc_001506	-	-0.487187	0.839107
hsacirc_001517	up	Inf	0.023265
hsacirc_001525	-	1.16993	0.9066
hsacirc_001528	-	1.75489	0.72648
hsacirc_001536	-	-0.830075	1
hsacirc_001540	-	-Inf	0.568974
hsacirc_001541	-	2.16993	0.777742
hsacirc_001546	-	-Inf	0.713286
hsacirc_001554	-	-1.63743	0.813453
hsacirc_001562	-	-2.152	0.488669
hsacirc_001563	-	-Inf	0.371575
hsacirc_001567	-	-Inf	0.568974
hsacirc_001571	-	-Inf	0.635054
hsacirc_001579	-	0.613532	0.755406
hsacirc_001587	-	-Inf	0.892474
hsacirc_001589	-	-Inf	0.635054
hsacirc_001591	-	-Inf	0.371575
hsacirc_001592	-	1	0.617291
hsacirc_001593	-	-Inf	0.371575
hsacirc_001594	-	1.2854	0.550035
hsacirc_001595	-	-Inf	0.635054
hsacirc_001596	-	1.01792	0.600457
hsacirc_001598	-	-Inf	0.280894
hsacirc_001607	-	-Inf	0.796896
hsacirc_001609	-	-Inf	0.568974
hsacirc_001610	-	-1	0.69042
hsacirc_001611	-	Inf	0.236584
hsacirc_001624	-	0.169925	1
hsacirc_001633	-	-0.508147	0.913472
hsacirc_001634	-	-Inf	0.514828
hsacirc_001638	-	-Inf	0.796896
hsacirc_001640	-	-Inf	0.324023
hsacirc_001642	-	-Inf	0.796896
hsacirc_001650	-	-Inf	0.892474
hsacirc_001654	-	-1.3112	0.528869
hsacirc_001657	-	-Inf	0.371575
hsacirc_001663	-	1.16993	0.9066
hsacirc_001665	-	-Inf	0.432801
hsacirc_001667	-	0.541894	0.816288
hsacirc_001669	-	-Inf	0.713286
hsacirc_001676	-	1.25239	0.522524
hsacirc_001681	-	-1	0.87476
hsacirc_001682	-	Inf	0.300267
hsacirc_001683	-	3.97728	0.116398
hsacirc_001686	-	-Inf	0.470422
hsacirc_001687	-	1.16993	0.9066
hsacirc_001694	-	-0.530515	0.931368
hsacirc_001696	-	-0.945552	0.644296
hsacirc_001697	-	Inf	0.403375
hsacirc_001702	-	-0.63743	0.980625
hsacirc_001706	-	-Inf	0.796896
hsacirc_001708	-	-0.344648	0.899602
hsacirc_001714	-	-Inf	0.892474
hsacirc_001717	-	-1.68806	0.488172
hsacirc_001742	-	-Inf	0.635054
hsacirc_001744	-	-Inf	0.796896
hsacirc_001761	-	0.847997	0.855687
hsacirc_001772	-	-Inf	0.796896
hsacirc_001773	-	-Inf	0.432801
hsacirc_001775	-	1.16993	0.9066
hsacirc_001782	-	-Inf	0.568974
hsacirc_001786	-	-Inf	0.432801
hsacirc_001792	-	0.169925	1
hsacirc_001794	-	2.62936	0.298215
hsacirc_001806	-	-Inf	0.796896
hsacirc_001809	-	-Inf	0.796896
hsacirc_001814	-	0.27684	0.949309
hsacirc_001815	-	-2.94555	0.176362
hsacirc_001820	-	-0.245112	0.920506
hsacirc_001827	-	-Inf	0.346852
hsacirc_001839	-	-Inf	0.568974
hsacirc_001867	-	3.49185	0.391448
hsacirc_001875	-	-0.830075	1
hsacirc_001876	-	3.49185	0.391448
hsacirc_001877	-	-0.152003	1
hsacirc_001881	-	-Inf	0.635054
hsacirc_001891	-	-Inf	0.371575
hsacirc_001900	-	0.584963	0.917795
hsacirc_001901	-	-Inf	0.432801
hsacirc_001906	-	-0.152003	1
hsacirc_001907	-	-1.152	0.828966
hsacirc_001908	-	0.584963	0.917795
hsacirc_001913	-	-1.49304	0.627409
hsacirc_001916	-	-Inf	0.713286
hsacirc_001927	-	1.90689	0.445884
hsacirc_001928	-	-2.19931	0.368254
hsacirc_001929	-	-2.91754	0.434517
hsacirc_001931	-	2.49185	0.341891
hsacirc_001932	-	-0.508147	0.913472
hsacirc_001933	-	-1	0.757333
hsacirc_001936	-	-1.152	0.828966
hsacirc_001937	-	-Inf	0.514828
hsacirc_001941	-	2.16993	0.600621
hsacirc_001944	-	0.169925	1
hsacirc_001948	-	3.16993	0.310363
hsacirc_001949	-	-Inf	0.470422
hsacirc_001959	-	-Inf	0.130351
hsacirc_001961	-	0.491853	0.916127
hsacirc_001963	-	-Inf	0.713286
hsacirc_001982	-	-Inf	0.470422
hsacirc_001987	-	1.16993	0.9066
hsacirc_001992	-	-0.415037	1
hsacirc_001994	-	-0.607683	0.835105
hsacirc_001997	-	-0.415037	1
hsacirc_002006	-	-0.736966	0.857153
hsacirc_002009	-	-Inf	0.514828
hsacirc_002013	-	2.16993	0.600621
hsacirc_002021	-	1.16993	0.784571
hsacirc_002028	-	-Inf	0.260101
hsacirc_002029	-	0.169925	1
hsacirc_002032	-	-Inf	0.713286
hsacirc_002033	-	-1.41504	0.745772
hsacirc_002036	-	-1.00695	0.599678
hsacirc_002038	-	-Inf	0.892474
hsacirc_002041	-	-Inf	0.514828
hsacirc_002044	-	-Inf	0.568974
hsacirc_002046	-	1.16993	0.9066
hsacirc_002049	-	1.43296	0.658808
hsacirc_002053	-	1.16993	0.9066
hsacirc_002057	-	-Inf	0.635054
hsacirc_002059	-	Inf	0.193642
hsacirc_002060	-	-Inf	0.892474
hsacirc_002067	-	-2.73697	0.292101
hsacirc_002071	-	0.169925	1
hsacirc_002074	-	-1.63743	0.506787
hsacirc_002083	-	-Inf	0.371575
hsacirc_002084	-	-Inf	0.892474
hsacirc_002086	-	-Inf	0.280894
hsacirc_002093	-	-Inf	0.635054
hsacirc_002095	-	-Inf	0.892474
hsacirc_002100	-	0.169925	1
hsacirc_002104	-	2.97728	0.367745
hsacirc_002109	-	-Inf	0.635054
hsacirc_002128	-	1.16993	0.9066
hsacirc_002134	-	0.321928	0.96358
hsacirc_002135	-	-0.152003	1
hsacirc_002140	-	-Inf	0.892474
hsacirc_002142	-	0.584963	1
hsacirc_002146	-	2.90689	0.28444
hsacirc_002153	-	0.754888	0.914553
hsacirc_002155	-	1.16993	0.717593
hsacirc_002157	-	-Inf	0.796896
hsacirc_002160	-	-Inf	0.568974
hsacirc_002167	-	-1.36613	0.469961
hsacirc_002171	-	-Inf	0.514828
hsacirc_002180	-	3.49185	0.391448
hsacirc_002184	-	-1.152	0.754682
hsacirc_002198	-	-Inf	0.514828
hsacirc_002201	-	-3.95936	0.149879
hsacirc_002204	-	0.169925	1
hsacirc_002206	-	-0.63743	0.980625
hsacirc_002207	-	0.947533	0.665642
hsacirc_002208	-	-Inf	0.280894
hsacirc_002213	-	-Inf	0.280894
hsacirc_002222	-	-Inf	0.568974
hsacirc_002223	-	-Inf	0.635054
hsacirc_002224	-	-2.99107	0.121079
hsacirc_002225	-	-Inf	0.796896
hsacirc_002231	-	-Inf	0.713286
hsacirc_002234	-	-1.41504	0.876365
hsacirc_002249	-	-3.53051	0.249419
hsacirc_002252	-	-Inf	0.796896
hsacirc_002262	-	1.75489	0.593976
hsacirc_002267	-	1.62936	0.485761
hsacirc_002275	-	-1.73697	0.635716
hsacirc_002277	-	Inf	0.300267
hsacirc_002283	-	1.16993	0.664791
hsacirc_002285	-	-Inf	0.514828
hsacirc_002287	-	-0.63743	0.980625
hsacirc_002289	-	-0.830075	1
hsacirc_002296	-	0.584963	1
hsacirc_002303	-	-2	0.709157
hsacirc_002306	-	1.16993	0.750277
hsacirc_002310	-	-0.415037	1
hsacirc_002313	-	0.36257	0.908793
hsacirc_002315	-	-0.100164	1
hsacirc_002317	-	1.43296	0.658808
hsacirc_002318	-	Inf	0.193642
hsacirc_002319	-	-Inf	0.796896
hsacirc_002320	-	1.75489	0.72648
hsacirc_002325	-	-Inf	0.796896
hsacirc_002333	-	-2.63743	0.524529
hsacirc_002337	-	-Inf	0.635054
hsacirc_002338	-	-Inf	0.796896
hsacirc_002342	-	-Inf	0.635054
hsacirc_002356	-	-2.24511	0.353857
hsacirc_002361	-	-Inf	0.514828
hsacirc_002363	-	Inf	0.193642
hsacirc_002364	-	-Inf	0.796896
hsacirc_002366	-	-Inf	0.470422
hsacirc_002374	-	-0.245112	1
hsacirc_002375	-	0.584963	1
hsacirc_002384	-	2.24031	0.259014
hsacirc_002389	-	3.75489	0.329284
hsacirc_002397	-	-Inf	0.470422
hsacirc_002409	-	-0.245112	1
hsacirc_002411	-	-Inf	0.796896
hsacirc_002419	-	-Inf	0.892474
hsacirc_002421	-	2.04439	0.396357
hsacirc_002423	-	-Inf	0.635054
hsacirc_002427	-	2.16993	0.600621
hsacirc_002435	-	0.169925	1
hsacirc_002438	-	2.39232	0.44689
hsacirc_002439	-	-Inf	0.796896
hsacirc_002445	-	-0.830075	0.924844
hsacirc_002448	-	2.75489	0.434583
hsacirc_002450	-	-3.63743	0.220986
hsacirc_002451	-	-0.152003	1
hsacirc_002453	-	Inf	0.193642
hsacirc_002458	-	-0.415037	1
hsacirc_002468	-	-Inf	0.635054
hsacirc_002471	-	-1.76867	0.522009
hsacirc_002479	-	-Inf	0.713286
hsacirc_002480	-	1.03242	0.663432
hsacirc_002485	-	-1.152	0.828966
hsacirc_002494	-	-0.482152	0.887472
hsacirc_002496	-	-0.25634	0.934197
hsacirc_002506	-	-2.28951	0.627172
hsacirc_002517	down	-Inf	0.0117003
hsacirc_002520	-	0.584963	1
hsacirc_002547	-	0.169925	1
hsacirc_002565	-	-Inf	0.514828
hsacirc_002567	-	0.584963	1
hsacirc_002571	-	2.97728	0.201533
hsacirc_002581	-	-Inf	0.371575
hsacirc_002586	-	-Inf	0.713286
hsacirc_002587	-	-2	0.709157
hsacirc_002589	-	-Inf	0.796896
hsacirc_002600	-	0.754888	0.822268
hsacirc_002611	-	0.754888	0.822268
hsacirc_002624	-	-Inf	0.635054
hsacirc_002629	-	-2	0.709157
hsacirc_002634	-	-Inf	0.713286
hsacirc_002641	-	-2.60486	0.176137
hsacirc_002648	-	-3.83007	0.0853279
hsacirc_002649	-	0.906891	0.810518
hsacirc_002655	-	0.169925	1
hsacirc_002660	-	-0.830075	1
hsacirc_002666	-	1.16993	0.9066
hsacirc_002667	-	-0.222392	0.984727
hsacirc_002668	-	-Inf	0.399736
hsacirc_002675	-	-Inf	0.470422
hsacirc_002676	-	-Inf	0.796896
hsacirc_002679	-	-Inf	0.796896
hsacirc_002688	-	Inf	0.236584
hsacirc_002699	-	1.16993	0.9066
hsacirc_002704	-	-Inf	0.371575
hsacirc_002706	-	1.774	0.330244
hsacirc_002708	-	-0.830075	1
hsacirc_002714	-	1.2854	0.550035
hsacirc_002716	-	-Inf	0.470422
hsacirc_002725	-	-Inf	0.892474
hsacirc_002734	-	-Inf	0.796896
hsacirc_002735	-	-Inf	0.222131
hsacirc_002738	-	-1.152	0.828966
hsacirc_002741	-	0.40439	0.875025
hsacirc_002742	-	-Inf	0.635054
hsacirc_002746	-	-Inf	0.635054
hsacirc_002753	-	-Inf	0.568974
hsacirc_002762	-	-Inf	0.514828
hsacirc_002763	-	-Inf	0.514828
hsacirc_002769	-	-Inf	0.796896
hsacirc_002771	-	-1.41504	0.745772
hsacirc_002773	-	2.75489	0.593691
hsacirc_002775	-	-0.508147	0.846668
hsacirc_002783	-	-Inf	0.635054
hsacirc_002786	-	1.16993	0.784571
hsacirc_002794	-	-1.49304	0.627409
hsacirc_002795	-	-2.63743	0.524529
hsacirc_002822	-	0.285402	0.903827
hsacirc_002823	-	-Inf	0.635054
hsacirc_002824	-	-2.35364	0.417412
hsacirc_002827	-	Inf	0.100053
hsacirc_002830	-	-Inf	0.324023
hsacirc_002832	-	0.584963	1
hsacirc_002834	-	-1.80408	0.370673
hsacirc_002837	-	-Inf	0.796896
hsacirc_002839	-	2.16993	0.450563
hsacirc_002845	-	-0.63743	0.980625
hsacirc_002853	-	-0.530515	0.931368
hsacirc_002855	-	-Inf	0.635054
hsacirc_002856	-	-Inf	0.432801
hsacirc_002859	-	0.847997	0.855687
hsacirc_002867	-	0.528379	0.772549
hsacirc_002868	-	0.169925	1
hsacirc_002875	-	-2.73697	0.492888
hsacirc_002876	-	-Inf	0.635054
hsacirc_002877	-	-Inf	0.346852
hsacirc_002882	-	Inf	0.193642
hsacirc_002890	down	-5	0.038956
hsacirc_002892	-	1.16993	0.9066
hsacirc_002903	-	0.906891	0.70193
hsacirc_002913	-	-Inf	0.892474
hsacirc_002914	-	2.75489	0.593691
hsacirc_002934	-	1.822	0.441998
hsacirc_002936	-	-Inf	0.470422
hsacirc_002941	-	-Inf	0.568974
hsacirc_002942	-	-Inf	0.514828
hsacirc_002943	-	1.75489	0.593976
hsacirc_002951	-	0.584963	1
hsacirc_002965	-	0.847997	0.855687
hsacirc_002972	-	-0.245112	1
hsacirc_002977	-	-Inf	0.240438
hsacirc_002983	-	-1.41504	0.745772
hsacirc_002985	-	Inf	0.300267
hsacirc_002995	-	-0.415037	1
hsacirc_002999	-	-Inf	0.240438
hsacirc_003002	-	-Inf	0.514828
hsacirc_003010	-	2.75489	0.13864
hsacirc_003014	-	-1.26303	0.529505
hsacirc_003018	-	-Inf	0.432801
hsacirc_003019	-	-Inf	0.635054
hsacirc_003022	-	-Inf	0.280894
hsacirc_003026	-	-Inf	0.514828
hsacirc_003028	-	-0.0106472	1
hsacirc_003041	-	-2.078	0.515217
hsacirc_003042	-	1.16993	0.9066
hsacirc_003052	-	-Inf	0.346852
hsacirc_003054	-	-Inf	0.302187
hsacirc_003055	-	0.947533	0.771863
hsacirc_003061	-	2.16993	0.600621
hsacirc_003063	-	-Inf	0.713286
hsacirc_003064	-	-1.20859	0.632943
hsacirc_003067	-	2.08746	0.313298
hsacirc_003071	-	-0.862496	0.656816
hsacirc_003077	-	-Inf	0.568974
hsacirc_003081	-	1.16993	0.9066
hsacirc_003086	-	0.169925	1
hsacirc_003101	-	-Inf	0.635054
hsacirc_003102	-	-1.63743	0.813453
hsacirc_003107	-	-Inf	0.635054
hsacirc_003109	-	2.16993	0.520601
hsacirc_003116	-	1.16993	0.784571
hsacirc_003131	-	-0.152003	1
hsacirc_003137	-	-1.31946	0.495217
hsacirc_003138	-	-0.704544	0.909021
hsacirc_003139	-	2.16993	0.777742
hsacirc_003142	-	-Inf	0.713286
hsacirc_003144	-	-Inf	0.796896
hsacirc_003153	-	-Inf	0.635054
hsacirc_003161	-	-1.152	0.828966
hsacirc_003169	-	-0.756074	0.816575
hsacirc_003170	-	0.269461	0.902906
hsacirc_003175	-	-1.152	0.828966
hsacirc_003177	-	2.75489	0.33078
hsacirc_003181	-	2.16993	0.600621
hsacirc_003191	-	-Inf	0.796896
hsacirc_003193	-	-0.192645	1
hsacirc_003194	-	-Inf	0.432801
hsacirc_003200	-	-Inf	0.302187
hsacirc_003207	-	-Inf	0.514828
hsacirc_003208	-	0.169925	1
hsacirc_003210	-	0.754888	0.822268
hsacirc_003212	-	-Inf	0.635054
hsacirc_003220	-	-0.830075	1
hsacirc_003224	-	-Inf	0.796896
hsacirc_003227	-	-Inf	0.568974
hsacirc_003230	-	-Inf	0.20562
hsacirc_003231	-	0.754888	0.914553
hsacirc_003235	-	-Inf	0.892474
hsacirc_003239	-	-0.152003	1
hsacirc_003243	-	-Inf	0.796896
hsacirc_003253	-	-Inf	0.796896
hsacirc_003255	-	-2.83007	0.462817
hsacirc_003261	-	2.75489	0.434583
hsacirc_003265	-	-1.152	0.828966
hsacirc_003273	-	-Inf	0.514828
hsacirc_003277	-	2.16993	0.450563
hsacirc_003291	-	-Inf	0.796896
hsacirc_003301	-	-Inf	0.568974
hsacirc_003302	-	-0.415037	0.971059
hsacirc_003304	-	2.16993	0.450563
hsacirc_003307	-	-Inf	0.568974
hsacirc_003308	-	-2.078	0.515217
hsacirc_003309	-	-1.152	0.828966
hsacirc_003311	-	1.2003	0.499928
hsacirc_003318	-	0.36257	0.908793
hsacirc_003321	-	1.16993	0.829853
hsacirc_003324	-	1.49185	0.682365
hsacirc_003327	-	-0.0122783	1
hsacirc_003328	-	-0.530515	0.931368
hsacirc_003337	-	2.75489	0.593691
hsacirc_003342	-	0.754888	0.914553
hsacirc_003345	-	-1.83007	0.603211
hsacirc_003346	-	-Inf	0.796896
hsacirc_003347	-	-0.168877	0.971991
hsacirc_003348	-	-2	0.709157
hsacirc_003356	-	-Inf	0.302187
hsacirc_003361	-	0.371559	0.842036
hsacirc_003364	-	-Inf	0.432801
hsacirc_003367	-	-2	0.709157
hsacirc_003377	-	-2.73697	0.292101
hsacirc_003383	-	-Inf	0.470422
hsacirc_003384	-	-Inf	0.892474
hsacirc_003394	-	-Inf	0.713286
hsacirc_003399	-	-Inf	0.796896
hsacirc_003405	-	-Inf	0.568974
hsacirc_003420	-	-Inf	0.796896
hsacirc_003429	-	-0.254573	0.929504
hsacirc_003431	-	-Inf	0.514828
hsacirc_003433	-	-0.415037	1
hsacirc_003443	-	-0.666576	0.810406
hsacirc_003444	-	-Inf	0.514828
hsacirc_003458	-	-0.208587	1
hsacirc_003468	-	-Inf	0.635054
hsacirc_003472	-	-0.152003	1
hsacirc_003480	-	Inf	0.300267
hsacirc_003481	-	Inf	0.125849
hsacirc_003483	-	-1.83007	0.758261
hsacirc_003484	-	-Inf	0.514828
hsacirc_003486	-	-Inf	0.892474
hsacirc_003490	-	-Inf	0.470422
hsacirc_003493	-	0.169925	1
hsacirc_003503	-	-Inf	0.892474
hsacirc_003517	-	-1.41504	0.876365
hsacirc_003523	-	-Inf	0.796896
hsacirc_003525	-	-Inf	0.346852
hsacirc_003538	-	-Inf	0.892474
hsacirc_003546	-	-0.415037	1
hsacirc_003553	-	-Inf	0.713286
hsacirc_003554	-	-Inf	0.470422
hsacirc_003564	-	-Inf	0.371575
hsacirc_003565	-	-1.152	0.828966
hsacirc_003570	-	0.584963	1
hsacirc_003574	-	-Inf	0.796896
hsacirc_003578	-	-Inf	0.796896
hsacirc_003579	-	1.75489	0.72648
hsacirc_003580	-	0.584963	1
hsacirc_003591	-	-Inf	0.796896
hsacirc_003606	-	-2.22239	0.463647
hsacirc_003609	-	0.754888	0.914553
hsacirc_003611	-	-3.68806	0.208213
hsacirc_003614	-	-1.41504	0.745772
hsacirc_003615	-	2.93546	0.178698
hsacirc_003618	-	-Inf	0.568974
hsacirc_003619	-	-0.289507	1
hsacirc_003622	-	-Inf	0.713286
hsacirc_003629	-	-0.415037	1
hsacirc_003630	-	0.169925	1
hsacirc_003631	-	0.169925	1
hsacirc_003643	-	Inf	0.125849
hsacirc_003646	-	3.75489	0.329284
hsacirc_003655	-	-1.152	0.828966
hsacirc_003683	-	1.16993	0.784571
hsacirc_003685	-	2.75489	0.434583
hsacirc_003694	-	2.16993	0.600621
hsacirc_003695	-	-Inf	0.635054
hsacirc_003707	-	-Inf	0.796896
hsacirc_003713	-	-Inf	0.635054
hsacirc_003714	-	-Inf	0.635054
hsacirc_003716	-	0.906891	0.620511
hsacirc_003728	-	-Inf	0.346852
hsacirc_003736	-	1.16993	0.664791
hsacirc_003740	-	-Inf	0.514828
hsacirc_003752	-	-Inf	0.346852
hsacirc_003753	-	1.75489	0.72648
hsacirc_003756	-	0.169925	1
hsacirc_003758	-	1.58496	0.701108
hsacirc_003764	-	-1	0.87476
hsacirc_003765	-	-2.11548	0.344249
hsacirc_003770	-	1.16993	0.642754
hsacirc_003773	-	1.16993	0.9066
hsacirc_003780	-	-Inf	0.892474
hsacirc_003782	-	-0.152003	1
hsacirc_003783	-	Inf	0.403375
hsacirc_003785	-	1.6845	0.493473
hsacirc_003788	-	0.0544478	1
hsacirc_003790	-	-2.91754	0.434517
hsacirc_003792	-	-2.47393	0.376017
hsacirc_003794	-	-1.0177	0.636424
hsacirc_003798	-	-0.152003	1
hsacirc_003799	-	-Inf	0.514828
hsacirc_003800	-	-Inf	0.635054
hsacirc_003802	-	0.754888	0.914553
hsacirc_003811	-	0.754888	0.914553
hsacirc_003812	-	-1.28951	0.786274
hsacirc_003813	-	-Inf	0.432801
hsacirc_003834	-	Inf	0.300267
hsacirc_003837	-	-1.41504	0.656981
hsacirc_003841	-	2.39232	0.44689
hsacirc_003842	-	-0.744345	0.725335
hsacirc_003844	-	0.432959	0.986521
hsacirc_003845	-	-0.152003	1
hsacirc_003846	-	0.584963	1
hsacirc_003847	-	-1.28951	0.497081
hsacirc_003851	-	-Inf	0.324023
hsacirc_003853	-	-0.289507	0.932026
hsacirc_003857	-	0.169925	1
hsacirc_003862	-	0.754888	0.914553
hsacirc_003863	-	3.20343e-16	1
hsacirc_003877	-	-Inf	0.514828
hsacirc_003880	-	-1.12482	0.603234
hsacirc_003885	-	-Inf	0.371575
hsacirc_003888	-	0.169925	1
hsacirc_003890	-	-0.0524674	1
hsacirc_003892	-	-Inf	0.635054
hsacirc_003903	-	3.20343e-16	1
hsacirc_003908	-	-Inf	0.796896
hsacirc_003914	-	2.90689	0.28444
hsacirc_003915	-	3.16993	0.310363
hsacirc_003918	-	0.584963	1
hsacirc_003924	-	1.06301	0.618573
hsacirc_003941	-	Inf	0.300267
hsacirc_003942	-	-3.58496	0.23472
hsacirc_003943	-	2.16993	0.777742
hsacirc_003952	-	0.928917	0.682161
hsacirc_003954	-	0.169925	1
hsacirc_003955	-	2.16993	0.777742
hsacirc_003956	-	-0.830075	1
hsacirc_003959	-	Inf	0.193642
hsacirc_003960	-	-0.245112	1
hsacirc_003971	-	-Inf	0.514828
hsacirc_003983	-	-Inf	0.470422
hsacirc_003984	-	0.469485	0.816872
hsacirc_004001	-	-1.152	0.593338
hsacirc_004004	-	-Inf	0.635054
hsacirc_004009	-	1.16993	0.784571
hsacirc_004011	-	-1.152	0.948859
hsacirc_004013	-	-1.08641	0.572564
hsacirc_004015	-	Inf	0.193642
hsacirc_004016	-	-Inf	0.514828
hsacirc_004017	-	1.16993	0.784571
hsacirc_004019	-	-Inf	0.432801
hsacirc_004023	-	-1	0.87476
hsacirc_004026	-	-1.41504	0.745772
hsacirc_004029	-	1.16993	0.9066
hsacirc_004030	-	-Inf	0.713286
hsacirc_004041	-	0.169925	1
hsacirc_004045	-	-Inf	0.796896
hsacirc_004047	-	-Inf	0.635054
hsacirc_004051	-	-Inf	0.892474
hsacirc_004052	-	-1.83007	0.603211
hsacirc_004061	-	1.41785	0.466648
hsacirc_004069	-	-Inf	0.796896
hsacirc_004075	-	-Inf	0.635054
hsacirc_004078	-	-Inf	0.796896
hsacirc_004080	-	-1	0.757333
hsacirc_004088	-	-2.95936	0.233093
hsacirc_004105	-	-Inf	0.713286
hsacirc_004106	-	0.584963	1
hsacirc_004108	-	0.947533	0.771863
hsacirc_004109	-	-Inf	0.635054
hsacirc_004111	-	-Inf	0.892474
hsacirc_004115	-	-Inf	0.713286
hsacirc_004120	-	-Inf	0.635054
hsacirc_004121	-	0.97728	0.739068
hsacirc_004123	-	-1.41504	0.745772
hsacirc_004125	-	Inf	0.125849
hsacirc_004131	-	-0.152003	1
hsacirc_004141	-	-2.53051	0.557295
hsacirc_004142	-	-1.94555	0.455662
hsacirc_004145	-	-Inf	0.432801
hsacirc_004149	-	0.169925	1
hsacirc_004174	-	-Inf	0.796896
hsacirc_004180	up	4.75489	0.0372523
hsacirc_004196	-	1.16993	0.9066
hsacirc_004206	-	-Inf	0.514828
hsacirc_004214	-	-Inf	0.240438
hsacirc_004215	-	-Inf	0.514828
hsacirc_004217	-	-Inf	0.713286
hsacirc_004218	-	-2.78427	0.278524
hsacirc_004224	-	1.16993	0.784571
hsacirc_004230	-	Inf	0.193642
hsacirc_004231	-	-Inf	0.796896
hsacirc_004232	-	-Inf	0.796896
hsacirc_004239	-	-Inf	0.796896
hsacirc_004241	-	-Inf	0.514828
hsacirc_004247	-	-Inf	0.635054
hsacirc_004261	-	1.16993	0.9066
hsacirc_004266	-	0.169925	1
hsacirc_004267	-	-Inf	0.796896
hsacirc_004270	-	-1.41504	0.745772
hsacirc_004275	-	-Inf	0.324023
hsacirc_004290	-	-Inf	0.892474
hsacirc_004304	-	-Inf	0.713286
hsacirc_004306	-	-Inf	0.432801
hsacirc_004309	-	1.75489	0.501919
hsacirc_004312	-	-1	0.87476
hsacirc_004313	-	-0.59561	0.808263
hsacirc_004325	-	-1.63743	0.813453
hsacirc_004330	-	-1.41504	0.656981
hsacirc_004332	-	0.584963	1
hsacirc_004343	-	-Inf	0.713286
hsacirc_004352	-	-0.917538	0.690219
hsacirc_004358	-	-0.830075	0.924844
hsacirc_004364	-	-Inf	0.371575
hsacirc_004373	-	-Inf	0.713286
hsacirc_004376	-	0.169925	1
hsacirc_004377	-	1.16993	0.784571
hsacirc_004381	-	-1.91754	0.407867
hsacirc_004384	-	-Inf	0.324023
hsacirc_004387	-	-2.152	0.665984
hsacirc_004396	-	Inf	0.193642
hsacirc_004402	-	0.459432	0.84694
hsacirc_004404	-	-Inf	0.432801
hsacirc_004405	-	-Inf	0.796896
hsacirc_004409	-	0.36257	0.908793
hsacirc_004413	up	Inf	0.0101881
hsacirc_004414	-	3.97728	0.27427
hsacirc_004415	-	-Inf	0.796896
hsacirc_004418	-	0.754888	0.914553
hsacirc_004427	-	-Inf	0.796896
hsacirc_004430	-	-Inf	0.635054
hsacirc_004431	-	-1.152	0.828966
hsacirc_004432	-	-Inf	0.514828
hsacirc_004434	-	-0.245112	1
hsacirc_004443	-	1.05445	0.631052
hsacirc_004447	down	-Inf	0.0387733
hsacirc_004450	-	-Inf	0.796896
hsacirc_004458	-	-2.72316	0.160167
hsacirc_004459	-	2.16993	0.600621
hsacirc_004465	-	-Inf	0.892474
hsacirc_004466	-	-2.152	0.665984
hsacirc_004467	-	-Inf	0.514828
hsacirc_004470	-	1.16993	0.750277
hsacirc_004472	-	-Inf	0.892474
hsacirc_004473	-	0.169925	1
hsacirc_004475	-	-Inf	0.635054
hsacirc_004482	-	-Inf	0.796896
hsacirc_004484	-	1.16993	0.784571
hsacirc_004496	-	-Inf	0.892474
hsacirc_004497	-	-Inf	0.796896
hsacirc_004498	-	-Inf	0.796896
hsacirc_004502	-	-1.83007	0.498691
hsacirc_004504	-	1.16993	0.9066
hsacirc_004505	-	-Inf	0.371575
hsacirc_004510	-	0.169925	1
hsacirc_004511	-	-0.945552	0.82764
hsacirc_004512	-	-Inf	0.796896
hsacirc_004517	-	-0.415037	1
hsacirc_004519	-	1.58496	0.565284
hsacirc_004520	-	-Inf	0.713286
hsacirc_004529	-	-1.24511	0.591484
hsacirc_004530	-	-2.41504	0.591285
hsacirc_004541	-	1.75489	0.593976
hsacirc_004549	-	-Inf	0.470422
hsacirc_004555	-	-Inf	0.635054
hsacirc_004556	-	-1.152	0.948859
hsacirc_004559	-	-Inf	0.514828
hsacirc_004561	-	-Inf	0.892474
hsacirc_004562	-	0.584963	0.917795
hsacirc_004576	-	0.584963	1
hsacirc_004581	-	2.16993	0.600621
hsacirc_004586	-	-0.830075	1
hsacirc_004600	-	-Inf	0.796896
hsacirc_004602	-	-Inf	0.635054
hsacirc_004612	-	-0.415037	1
hsacirc_004617	-	1.16993	0.9066
hsacirc_004618	-	-1.73697	0.635716
hsacirc_004619	-	0.584963	0.917795
hsacirc_004620	-	-0.415037	1
hsacirc_004629	-	-Inf	0.514828
hsacirc_004631	-	0.584963	1
hsacirc_004632	-	-Inf	0.568974
hsacirc_004638	-	1.75489	0.593976
hsacirc_004642	-	0.584963	0.869365
hsacirc_004647	-	-Inf	0.371575
hsacirc_004649	-	-Inf	0.635054
hsacirc_004653	-	-Inf	0.514828
hsacirc_004657	-	-Inf	0.892474
hsacirc_004659	-	-Inf	0.371575
hsacirc_004661	-	-Inf	0.796896
hsacirc_004662	-	-Inf	0.796896
hsacirc_004664	-	-0.0825442	0.994642
hsacirc_004668	-	0.169925	1
hsacirc_004670	-	-Inf	0.892474
hsacirc_004671	-	-Inf	0.470422
hsacirc_004690	-	-Inf	0.713286
hsacirc_004691	-	-Inf	0.176772
hsacirc_004696	-	-0.830075	1
hsacirc_004699	-	-0.714598	0.738282
hsacirc_004701	-	-2.44478	0.252362
hsacirc_004702	-	0.584963	0.869365
hsacirc_004708	-	0.36257	0.973368
hsacirc_004713	-	-Inf	0.176772
hsacirc_004714	-	0.169925	1
hsacirc_004718	-	-Inf	0.0787488
hsacirc_004726	-	-0.678072	0.847625
hsacirc_004737	-	0.169925	1
hsacirc_004739	-	1.16993	0.9066
hsacirc_004740	-	0.584963	1
hsacirc_004743	-	-0.289507	1
hsacirc_004760	-	-Inf	0.796896
hsacirc_004773	-	-Inf	0.635054
hsacirc_004778	-	-Inf	0.514828
hsacirc_004779	-	-Inf	0.796896
hsacirc_004783	-	0.169925	0.964613
hsacirc_004787	-	-Inf	0.796896
hsacirc_004789	-	-Inf	0.635054
hsacirc_004791	-	-0.464791	0.834109
hsacirc_004792	-	2.16993	0.777742
hsacirc_004793	-	-Inf	0.568974
hsacirc_004801	-	-Inf	0.635054
hsacirc_004803	-	-Inf	0.796896
hsacirc_004805	-	0.754888	0.914553
hsacirc_004810	-	4.07682	0.100718
hsacirc_004814	-	-Inf	0.635054
hsacirc_004816	-	-0.830075	1
hsacirc_004817	-	-0.830075	0.684934
hsacirc_004819	-	-Inf	0.796896
hsacirc_004823	-	Inf	0.300267
hsacirc_004848	-	-Inf	0.568974
hsacirc_004850	-	-Inf	0.796896
hsacirc_004853	-	-1.41504	0.473431
hsacirc_004857	-	-1.83007	0.758261
hsacirc_004860	-	-1.152	0.948859
hsacirc_004863	-	-Inf	0.796896
hsacirc_004873	-	-Inf	0.796896
hsacirc_004877	-	-Inf	0.371575
hsacirc_004878	-	-Inf	0.260101
hsacirc_004885	-	0.754888	0.914553
hsacirc_004887	-	-1.3744	0.540942
hsacirc_004898	-	1.16993	0.9066
hsacirc_004899	-	1.16993	0.9066
hsacirc_004906	-	-1.152	0.828966
hsacirc_004909	-	1.16993	0.717593
hsacirc_004910	-	-Inf	0.635054
hsacirc_004912	-	-1.76867	0.522009
hsacirc_004915	-	Inf	0.193642
hsacirc_004918	-	-Inf	0.635054
hsacirc_004927	-	Inf	0.300267
hsacirc_004937	-	-0.0524674	1
hsacirc_004940	-	-1	0.87476
hsacirc_004942	-	-2.03171	0.337904
hsacirc_004943	-	0.169925	1
hsacirc_004944	-	-2.63743	0.524529
hsacirc_004945	-	Inf	0.236584
hsacirc_004961	-	-Inf	0.796896
hsacirc_004963	-	-Inf	0.470422
hsacirc_004970	-	-Inf	0.892474
hsacirc_004973	-	-Inf	0.796896
hsacirc_004976	-	-1.05247	0.622062
hsacirc_004983	-	2.75489	0.593691
hsacirc_004991	-	-1.83007	0.603211
hsacirc_004995	-	-Inf	0.432801
hsacirc_004996	-	-0.415037	1
hsacirc_005010	-	0.169925	1
hsacirc_005016	-	1.16993	0.9066
hsacirc_005017	-	-0.945552	0.82764
hsacirc_005018	-	1.16993	0.784571
hsacirc_005021	-	-2.63743	0.524529
hsacirc_005027	-	-1.83007	0.758261
hsacirc_005028	-	-Inf	0.514828
hsacirc_005030	-	-1.28951	0.786274
hsacirc_005032	-	-Inf	0.568974
hsacirc_005040	-	-Inf	0.796896
hsacirc_005044	-	-Inf	0.260101
hsacirc_005054	-	Inf	0.125849
hsacirc_005055	-	-Inf	0.260101
hsacirc_005058	-	0.169925	1
hsacirc_005061	-	0.169925	1
hsacirc_005064	-	1.16993	0.9066
hsacirc_005079	-	-Inf	0.635054
hsacirc_005082	-	2.75489	0.434583
hsacirc_005088	-	-Inf	0.713286
hsacirc_005092	-	-Inf	0.280894
hsacirc_005116	-	1.822	0.441998
hsacirc_005123	-	-Inf	0.514828
hsacirc_005124	-	-0.63743	0.839821
hsacirc_005134	-	-1.152	0.655634
hsacirc_005135	-	-0.152003	1
hsacirc_005136	-	-0.530515	0.855082
hsacirc_005140	-	2.75489	0.434583
hsacirc_005144	-	Inf	0.158029
hsacirc_005147	-	-2.57698	0.266472
hsacirc_005149	-	0.169925	1
hsacirc_005156	-	-Inf	0.140524
hsacirc_005158	-	-Inf	0.892474
hsacirc_005159	-	-Inf	0.892474
hsacirc_005160	-	-Inf	0.796896
hsacirc_005164	-	Inf	0.0640385
hsacirc_005166	-	-0.415037	1
hsacirc_005167	-	1.16993	0.9066
hsacirc_005173	-	-Inf	0.568974
hsacirc_005178	-	-Inf	0.796896
hsacirc_005182	-	-1.22697	0.524123
hsacirc_005186	-	-Inf	0.346852
hsacirc_005188	-	1.39232	0.440687
hsacirc_005191	-	-1.52759	0.498181
hsacirc_005193	-	-Inf	0.713286
hsacirc_005194	-	0.791413	0.739074
hsacirc_005198	-	-3.078	0.205708
hsacirc_005202	-	0.321928	0.96358
hsacirc_005203	-	-1.152	0.828966
hsacirc_005204	-	-2.73697	0.492888
hsacirc_005229	-	-Inf	0.892474
hsacirc_005230	-	-Inf	0.796896
hsacirc_005232	-	-3.078	0.205708
hsacirc_005236	-	-1.60768	0.435774
hsacirc_005252	-	-0.270648	0.933071
hsacirc_005253	-	0.141356	0.940915
hsacirc_005259	-	2.75489	0.434583
hsacirc_005262	-	-Inf	0.324023
hsacirc_005263	-	-1.41504	0.876365
hsacirc_005264	-	-2.22239	0.463647
hsacirc_005266	-	-0.678072	0.772164
hsacirc_005268	-	Inf	0.300267
hsacirc_005275	-	-Inf	0.713286
hsacirc_005279	-	-Inf	0.635054
hsacirc_005280	-	-Inf	0.796896
hsacirc_005285	-	0.847997	0.855687
hsacirc_005286	-	0.584963	0.917795
hsacirc_005294	-	-1.83007	0.758261
hsacirc_005298	-	Inf	0.193642
hsacirc_005302	-	-Inf	0.635054
hsacirc_005303	-	2.16993	0.777742
hsacirc_005306	-	-Inf	0.892474
hsacirc_005309	-	Inf	0.300267
hsacirc_005310	-	-0.289507	1
hsacirc_005312	-	-Inf	0.796896
hsacirc_005316	-	-Inf	0.346852
hsacirc_005317	-	-0.415037	1
hsacirc_005318	-	-Inf	0.892474
hsacirc_005325	-	-2.53051	0.231623
hsacirc_005328	-	1.65344	0.401318
hsacirc_005335	-	-0.63743	0.89345
hsacirc_005336	-	-Inf	0.796896
hsacirc_005345	-	-Inf	0.568974
hsacirc_005346	-	-1.152	0.828966
hsacirc_005351	-	0.169925	1
hsacirc_005352	-	-1.41504	0.745772
hsacirc_005357	-	-Inf	0.635054
hsacirc_005361	-	-Inf	0.280894
hsacirc_005368	-	2.16993	0.600621
hsacirc_005369	-	0.169925	1
hsacirc_005375	-	0.169925	1
hsacirc_005377	-	-Inf	0.796896
hsacirc_005378	-	1.16993	0.9066
hsacirc_005379	-	1.58496	0.701108
hsacirc_005381	-	0.532495	0.838575
hsacirc_005387	-	-Inf	0.713286
hsacirc_005395	-	-Inf	0.470422
hsacirc_005399	-	1.75489	0.593976
hsacirc_005414	-	-Inf	0.796896
hsacirc_005415	down	-4.03171	0.0466711
hsacirc_005417	-	-Inf	0.470422
hsacirc_005425	-	0.169925	1
hsacirc_005426	-	-Inf	0.796896
hsacirc_005434	-	-Inf	0.635054
hsacirc_005449	-	-Inf	0.399736
hsacirc_005450	-	-Inf	0.796896
hsacirc_005451	-	-0.63743	0.980625
hsacirc_005452	-	-0.72316	0.78664
hsacirc_005458	-	Inf	0.236584
hsacirc_005461	-	-Inf	0.796896
hsacirc_005480	-	-Inf	0.20562
hsacirc_005487	-	-1.152	0.828966
hsacirc_005490	-	-Inf	0.568974
hsacirc_005491	-	Inf	0.158029
hsacirc_005509	-	-2.53051	0.357003
hsacirc_005510	-	0.584963	1
hsacirc_005512	-	-Inf	0.130351
hsacirc_005517	-	-Inf	0.796896
hsacirc_005518	-	-2.83007	0.462817
hsacirc_005521	-	0.491853	0.916127
hsacirc_005524	-	-2.41504	0.591285
hsacirc_005525	-	-Inf	0.892474
hsacirc_005537	-	-Inf	0.280894
hsacirc_005542	-	-Inf	0.470422
hsacirc_005547	-	-Inf	0.514828
hsacirc_005549	-	-Inf	0.796896
hsacirc_005550	-	3.16993	0.474514
hsacirc_005562	-	0.169925	1
hsacirc_005567	-	-Inf	0.399736
hsacirc_005568	-	-Inf	0.635054
hsacirc_005571	-	-Inf	0.796896
hsacirc_005572	-	Inf	0.300267
hsacirc_005574	-	0.169925	1
hsacirc_005575	-	-3.91754	0.157661
hsacirc_005579	-	-Inf	0.796896
hsacirc_005580	-	-Inf	0.514828
hsacirc_005581	-	-0.830075	1
hsacirc_005583	-	-0.508147	0.913472
hsacirc_005584	-	-1.52039	0.432411
hsacirc_005587	-	0.169925	1
hsacirc_005589	-	-Inf	0.713286
hsacirc_005590	-	-Inf	0.432801
hsacirc_005600	-	-1	0.87476
hsacirc_005603	-	-2.38466	0.215833
hsacirc_005606	-	1.16993	0.9066
hsacirc_005619	-	2.16993	0.600621
hsacirc_005622	-	-Inf	0.635054
hsacirc_005624	-	-Inf	0.713286
hsacirc_005634	-	-3.41504	0.281853
hsacirc_005636	-	4.16993	0.211924
hsacirc_005641	-	-Inf	0.796896
hsacirc_005645	-	-Inf	0.20562
hsacirc_005646	-	-1.35364	0.616964
hsacirc_005648	-	-1.152	0.57273
hsacirc_005652	-	-1.83007	0.758261
hsacirc_005654	-	3.20343e-16	1
hsacirc_005665	-	0.169925	0.955125
hsacirc_005669	-	-Inf	0.796896
hsacirc_005681	-	-Inf	0.713286
hsacirc_005687	-	-Inf	0.796896
hsacirc_005701	-	-2.28951	0.627172
hsacirc_005702	-	-2.35364	0.417412
hsacirc_005704	-	2.16993	0.600621
hsacirc_005711	-	1.16993	0.784571
hsacirc_005715	-	Inf	0.300267
hsacirc_005717	-	1.62936	0.485761
hsacirc_005726	-	-Inf	0.240438
hsacirc_005739	-	1.69349	0.372747
hsacirc_005741	-	-Inf	0.371575
hsacirc_005747	-	-Inf	0.635054
hsacirc_005750	-	1.16993	0.829853
hsacirc_005751	-	0.122619	0.965149
hsacirc_005753	-	-Inf	0.470422
hsacirc_005761	-	-Inf	0.635054
hsacirc_005766	-	-0.332575	0.962322
hsacirc_005767	-	0.169925	1
hsacirc_005773	-	-Inf	0.280894
hsacirc_005776	-	-3.58496	0.114962
hsacirc_005781	-	-0.0710831	1
hsacirc_005787	-	-Inf	0.568974
hsacirc_005790	-	-Inf	0.892474
hsacirc_005791	-	-1.152	0.552352
hsacirc_005792	-	-0.49304	0.823034
hsacirc_005793	-	-0.830075	1
hsacirc_005795	-	-1.152	0.828966
hsacirc_005796	-	0.532495	0.838575
hsacirc_005801	-	1.16993	0.784571
hsacirc_005802	-	2.16993	0.600621
hsacirc_005803	-	-0.0524674	1
hsacirc_005804	-	2.75489	0.434583
hsacirc_005807	-	2.75489	0.177662
hsacirc_005809	-	1.90689	0.295464
hsacirc_005812	-	0.847997	0.753642
hsacirc_005828	-	-Inf	0.796896
hsacirc_005842	-	-Inf	0.371575
hsacirc_005843	-	-0.280736	0.925585
hsacirc_005851	-	-Inf	0.796896
hsacirc_005856	-	-Inf	0.796896
hsacirc_005859	-	-1.11958	0.594676
hsacirc_005862	-	-2.34994	0.256422
hsacirc_005869	-	-1.53051	0.707156
hsacirc_005889	-	-0.415037	1
hsacirc_005890	-	Inf	0.100053
hsacirc_005893	-	-Inf	0.514828
hsacirc_005901	-	-Inf	0.796896
hsacirc_005906	-	-Inf	0.796896
hsacirc_005909	-	-1.59561	0.484545
hsacirc_005915	-	-1.152	0.828966
hsacirc_005934	-	-1.53051	0.707156
hsacirc_005938	-	0.906891	0.810518
hsacirc_005939	-	0.432959	0.986521
hsacirc_005942	-	-1.91754	0.326987
hsacirc_005946	-	-Inf	0.514828
hsacirc_005950	-	-Inf	0.796896
hsacirc_005951	-	-0.152003	1
hsacirc_005953	-	-2.078	0.515217
hsacirc_005955	-	Inf	0.300267
hsacirc_005960	-	-Inf	0.892474
hsacirc_005963	-	2.75489	0.434583
hsacirc_005972	-	0.5025	0.799925
hsacirc_005973	-	-Inf	0.892474
hsacirc_005975	-	-0.736966	0.857153
hsacirc_005977	-	-2.28951	0.627172
hsacirc_005980	-	-Inf	0.514828
hsacirc_005984	-	1.16993	0.9066
hsacirc_005988	-	-Inf	0.514828
hsacirc_005993	-	0.36257	0.908793
hsacirc_005994	-	-Inf	0.324023
hsacirc_005996	-	3.16993	0.474514
hsacirc_006001	-	-1.152	0.948859
hsacirc_006013	-	-1.152	0.828966
hsacirc_006015	-	-Inf	0.514828
hsacirc_006016	-	Inf	0.300267
hsacirc_006017	-	0.887525	0.617444
hsacirc_006028	-	-Inf	0.568974
hsacirc_006033	-	-0.0524674	1
hsacirc_006035	-	-1.43342	0.462959
hsacirc_006042	-	-Inf	0.514828
hsacirc_006056	-	-Inf	0.796896
hsacirc_006060	-	-Inf	0.796896
hsacirc_006063	-	-Inf	0.514828
hsacirc_006064	-	-Inf	0.796896
hsacirc_006067	-	-Inf	0.796896
hsacirc_006068	-	-0.415037	1
hsacirc_006073	-	-1.83007	0.758261
hsacirc_006078	-	-1.152	0.948859
hsacirc_006080	-	-1	0.87476
hsacirc_006089	-	-Inf	0.892474
hsacirc_006111	-	-Inf	0.324023
hsacirc_006115	-	-Inf	0.892474
hsacirc_006116	-	1.16993	0.554566
hsacirc_006117	-	-Inf	0.635054
hsacirc_006125	-	-Inf	0.635054
hsacirc_006129	-	3.97728	0.116398
hsacirc_006130	-	-2.2109	0.242213
hsacirc_006133	-	-Inf	0.120959
hsacirc_006142	-	0.33039	0.849083
hsacirc_006147	-	-Inf	0.796896
hsacirc_006151	-	0.169925	1
hsacirc_006153	-	0.27684	0.949309
hsacirc_006155	-	-Inf	0.796896
hsacirc_006161	-	-Inf	0.796896
hsacirc_006164	-	0.947533	0.665642
hsacirc_006169	-	-0.830075	1
hsacirc_006171	-	-Inf	0.796896
hsacirc_006176	-	-1.152	0.697533
hsacirc_006179	-	-Inf	0.635054
hsacirc_006181	-	1.16993	0.9066
hsacirc_006185	-	-Inf	0.892474
hsacirc_006188	-	-Inf	0.796896
hsacirc_006193	-	1.16993	0.642754
hsacirc_006195	-	0.584963	0.917795
hsacirc_006196	-	-1.53051	0.707156
hsacirc_006201	-	-Inf	0.635054
hsacirc_006203	-	-Inf	0.514828
hsacirc_006204	-	0.169925	1
hsacirc_006206	-	1.16993	0.717593
hsacirc_006208	-	0.169925	0.936046
hsacirc_006214	-	Inf	0.193642
hsacirc_006215	-	-1.66658	0.41555
hsacirc_006216	-	-Inf	0.796896
hsacirc_006223	-	-0.415037	0.971059
hsacirc_006229	-	-0.63743	0.89345
hsacirc_006235	-	-Inf	0.514828
hsacirc_006237	-	-Inf	0.514828
hsacirc_006240	-	-0.415037	1
hsacirc_006246	-	2.75489	0.434583
hsacirc_006251	-	-1.63743	0.813453
hsacirc_006255	-	-Inf	0.635054
hsacirc_006258	-	-2	0.709157
hsacirc_006261	-	0.169925	1
hsacirc_006262	-	Inf	0.300267
hsacirc_006263	-	1.16993	0.575805
hsacirc_006266	-	-Inf	0.713286
hsacirc_006269	-	2.49185	0.509
hsacirc_006270	-	-Inf	0.514828
hsacirc_006273	-	-Inf	0.568974
hsacirc_006276	-	-Inf	0.568974
hsacirc_006281	-	-Inf	0.399736
hsacirc_006288	-	-0.152003	1
hsacirc_006290	-	1.58496	0.701108
hsacirc_006293	-	-0.530515	0.931368
hsacirc_006298	-	-Inf	0.635054
hsacirc_006303	-	1.16993	0.9066
hsacirc_006311	-	-Inf	0.371575
hsacirc_006312	-	-Inf	0.432801
hsacirc_006315	-	-Inf	0.514828
hsacirc_006319	-	0.169925	1
hsacirc_006320	-	0.847997	0.855687
hsacirc_006325	-	-Inf	0.514828
hsacirc_006329	-	-Inf	0.568974
hsacirc_006332	-	-1.73697	0.635716
hsacirc_006339	-	-1.48215	0.436434
hsacirc_006342	-	0.432959	0.913721
hsacirc_006347	-	-Inf	0.399736
hsacirc_006351	-	0.169925	0.985891
hsacirc_006370	-	1.16993	0.9066
hsacirc_006372	-	-1	0.757333
hsacirc_006379	-	0.169925	1
hsacirc_006382	-	-Inf	0.796896
hsacirc_006384	-	Inf	0.300267
hsacirc_006387	-	-Inf	0.432801
hsacirc_006388	-	0.584963	0.869365
hsacirc_006390	-	-0.263034	0.953851
hsacirc_006396	-	-Inf	0.568974
hsacirc_006400	-	-Inf	0.796896
hsacirc_006407	-	0.169925	1
hsacirc_006416	-	-Inf	0.568974
hsacirc_006421	-	-Inf	0.796896
hsacirc_006423	-	-0.415037	1
hsacirc_006425	-	-0.830075	1
hsacirc_006427	-	0.33985	0.907055
hsacirc_006428	-	-2.67138	0.235921
hsacirc_006431	-	-2.56704	0.192325
hsacirc_006433	-	-0.152003	1
hsacirc_006441	-	0.169925	0.947915
hsacirc_006442	-	-Inf	0.635054
hsacirc_006443	-	-1.53051	0.707156
hsacirc_006447	-	-1.152	0.828966
hsacirc_006448	-	0.754888	0.667445
hsacirc_006449	-	-Inf	0.371575
hsacirc_006450	-	0.584963	1
hsacirc_006457	-	-Inf	0.796896
hsacirc_006460	-	-Inf	0.635054
hsacirc_006465	-	1.04439	0.645544
hsacirc_006466	-	-Inf	0.635054
hsacirc_006471	-	-Inf	0.635054
hsacirc_006472	-	-2	0.709157
hsacirc_006473	-	-Inf	0.635054
hsacirc_006477	-	-2.35364	0.417412
hsacirc_006480	-	2.01792	0.449113
hsacirc_006486	-	-Inf	0.514828
hsacirc_006488	-	0.584963	1
hsacirc_006492	-	0.584963	0.917795
hsacirc_006493	-	-Inf	0.892474
hsacirc_006495	-	0.169925	1
hsacirc_006517	-	-0.0524674	1
hsacirc_006520	-	-Inf	0.796896
hsacirc_006522	-	-0.332575	0.962322
hsacirc_006523	-	1.75489	0.72648
hsacirc_006532	-	-2.28951	0.627172
hsacirc_006534	-	-Inf	0.892474
hsacirc_006539	-	-Inf	0.097097
hsacirc_006556	-	-0.253286	0.926284
hsacirc_006559	-	-3	0.408433
hsacirc_006562	-	-Inf	0.20562
hsacirc_006564	-	-Inf	0.635054
hsacirc_006565	-	3.97728	0.27427
hsacirc_006576	-	0.392317	0.911147
hsacirc_006585	-	-Inf	0.432801
hsacirc_006587	-	-1.63743	0.813453
hsacirc_006588	-	-Inf	0.324023
hsacirc_006589	-	-1.63743	0.813453
hsacirc_006599	-	-0.415037	1
hsacirc_006601	-	-Inf	0.346852
hsacirc_006609	-	0.169925	0.995832
hsacirc_006610	-	-3.71272	0.098459
hsacirc_006611	-	-Inf	0.713286
hsacirc_006620	-	1.94753	0.396952
hsacirc_006623	-	1.39232	0.636962
hsacirc_006627	-	-0.63743	0.980625
hsacirc_006629	-	-Inf	0.222131
hsacirc_006630	-	-Inf	0.635054
hsacirc_006631	-	-1.63743	0.67043
hsacirc_006632	-	-Inf	0.568974
hsacirc_006633	-	-Inf	0.470422
hsacirc_006635	-	-0.503847	0.813947
hsacirc_006636	-	-0.63743	0.89345
hsacirc_006643	-	1.16993	0.642754
hsacirc_006648	-	-Inf	0.713286
hsacirc_006657	-	-Inf	0.635054
hsacirc_006659	-	-Inf	0.892474
hsacirc_006660	-	-1.41504	0.876365
hsacirc_006672	-	-Inf	0.796896
hsacirc_006675	-	-0.277534	0.942047
hsacirc_006681	-	-Inf	0.568974
hsacirc_006694	-	-1.41504	0.745772
hsacirc_006700	-	-4.152	0.118565
hsacirc_006701	-	-0.805827	0.684414
hsacirc_006708	-	-Inf	0.796896
hsacirc_006714	-	-Inf	0.568974
hsacirc_006718	-	-Inf	0.635054
hsacirc_006729	-	-Inf	0.514828
hsacirc_006739	-	1.62936	0.485761
hsacirc_006744	-	-Inf	0.280894
hsacirc_006745	-	-Inf	0.302187
hsacirc_006754	-	-Inf	0.302187
hsacirc_006763	-	-1.91754	0.572519
hsacirc_006770	-	-Inf	0.568974
hsacirc_006775	-	2.75489	0.434583
hsacirc_006778	-	-Inf	0.713286
hsacirc_006787	-	1.58496	0.701108
hsacirc_006794	-	3.16993	0.474514
hsacirc_006807	-	-Inf	0.713286
hsacirc_006809	-	-Inf	0.514828
hsacirc_006810	-	-Inf	0.568974
hsacirc_006816	-	1.16993	0.9066
hsacirc_006825	-	-0.830075	1
hsacirc_006830	-	0.169925	1
hsacirc_006832	-	0.432959	0.986521
hsacirc_006836	-	1.58496	0.701108
hsacirc_006842	-	0.491853	0.842883
hsacirc_006844	-	-1.24511	0.720647
hsacirc_006849	-	-2	0.543231
hsacirc_006862	-	-0.152003	1
hsacirc_006869	-	1.16993	0.829853
hsacirc_006870	-	-Inf	0.280894
hsacirc_006873	-	1.75489	0.593976
hsacirc_006895	-	-Inf	0.713286
hsacirc_006904	-	0.0703893	1
hsacirc_006909	-	0.295456	0.955791
hsacirc_006916	-	-Inf	0.796896
hsacirc_006917	-	-0.415037	0.929906
hsacirc_006928	-	-Inf	0.796896
hsacirc_006931	-	0.169925	1
hsacirc_006935	-	-Inf	0.635054
hsacirc_006941	-	0.169925	1
hsacirc_006942	-	-Inf	0.260101
hsacirc_006944	-	-1.152	0.828966
hsacirc_006945	-	-2	0.709157
hsacirc_006953	-	-Inf	0.470422
hsacirc_006960	-	-Inf	0.260101
hsacirc_006962	-	-Inf	0.796896
hsacirc_006963	-	-Inf	0.796896
hsacirc_006964	-	-3.152	0.361225
hsacirc_006968	-	-Inf	0.796896
hsacirc_006976	-	-1.152	0.948859
hsacirc_006979	-	-2.39486	0.22647
hsacirc_006980	-	-Inf	0.796896
hsacirc_006982	-	1.16993	0.784571
hsacirc_006987	-	-0.830075	0.760264
hsacirc_006989	-	-Inf	0.280894
hsacirc_007004	-	-Inf	0.635054
hsacirc_007008	-	-Inf	0.324023
hsacirc_007015	-	-0.415037	1
hsacirc_007024	-	-1.91754	0.572519
hsacirc_007025	-	-1	0.87476
hsacirc_007037	-	-1.83007	0.603211
hsacirc_007043	-	2.16993	0.395507
hsacirc_007044	-	-Inf	0.713286
hsacirc_007049	-	0.584963	0.917795
hsacirc_007051	-	-1.41504	0.745772
hsacirc_007057	-	2.75489	0.593691
hsacirc_007068	-	0.847997	0.855687
hsacirc_007077	-	-Inf	0.796896
hsacirc_007078	-	-Inf	0.568974
hsacirc_007081	-	-3.53051	0.249419
hsacirc_007083	-	-Inf	0.371575
hsacirc_007084	-	0.169925	1
hsacirc_007091	-	-Inf	0.635054
hsacirc_007092	-	-2.152	0.665984
hsacirc_007101	-	Inf	0.193642
hsacirc_007104	-	-Inf	0.280894
hsacirc_007110	-	-Inf	0.399736
hsacirc_007114	up	Inf	0.000633119
hsacirc_007115	-	-Inf	0.635054
hsacirc_007122	-	-Inf	0.796896
hsacirc_007127	-	-Inf	0.713286
hsacirc_007136	-	-Inf	0.324023
hsacirc_007140	-	0.847997	0.753642
hsacirc_007144	-	-Inf	0.635054
hsacirc_007148	-	1.75489	0.330766
hsacirc_007162	-	-Inf	0.713286
hsacirc_007165	-	-Inf	0.470422
hsacirc_007166	-	-Inf	0.280894
hsacirc_007167	-	-Inf	0.280894
hsacirc_007170	-	-1.152	0.754682
hsacirc_007175	-	2.49185	0.509
hsacirc_007186	-	2.16993	0.777742
hsacirc_007189	-	0.222392	0.925926
hsacirc_007194	-	0.97728	0.739068
hsacirc_007196	-	-0.415037	1
hsacirc_007198	-	0.169925	1
hsacirc_007203	-	-3.078	0.205708
hsacirc_007205	-	-0.499926	0.843576
hsacirc_007207	-	1.16993	0.9066
hsacirc_007208	-	-Inf	0.796896
hsacirc_007214	down	-Inf	0.033836
hsacirc_007217	-	-1.53051	0.707156
hsacirc_007240	-	-1.41504	0.745772
hsacirc_007242	-	-Inf	0.635054
hsacirc_007243	-	-Inf	0.280894
hsacirc_007246	-	-Inf	0.796896
hsacirc_007248	-	3.20343e-16	1
hsacirc_007251	-	-Inf	0.892474
hsacirc_007254	-	0.584963	1
hsacirc_007264	-	0.432959	0.85044
hsacirc_007272	-	-0.830075	1
hsacirc_007289	-	-Inf	0.635054
hsacirc_007292	-	-Inf	0.0787488
hsacirc_007293	-	-0.357322	0.886109
hsacirc_007295	-	-Inf	0.470422
hsacirc_007300	-	-Inf	0.568974
hsacirc_007303	-	-Inf	0.0842941
hsacirc_007304	-	-Inf	0.635054
hsacirc_007308	-	-Inf	0.892474
hsacirc_007309	-	2.16993	0.304949
hsacirc_007311	-	-Inf	0.796896
hsacirc_007315	-	-Inf	0.796896
hsacirc_007323	-	-Inf	0.892474
hsacirc_007325	-	-Inf	0.568974
hsacirc_007329	-	0.432959	0.986521
hsacirc_007342	-	-Inf	0.892474
hsacirc_007344	-	0.584963	0.869365
hsacirc_007349	-	-Inf	0.432801
hsacirc_007352	-	-Inf	0.892474
hsacirc_007354	-	-0.415037	1
hsacirc_007358	-	1.58496	0.701108
hsacirc_007360	-	-Inf	0.713286
hsacirc_007363	-	-1.63743	0.813453
hsacirc_007375	-	-Inf	0.713286
hsacirc_007377	-	-Inf	0.568974
hsacirc_007387	-	-Inf	0.713286
hsacirc_007394	-	-0.830075	0.867209
hsacirc_007403	-	-Inf	0.635054
hsacirc_007410	-	-Inf	0.713286
hsacirc_007413	-	-Inf	0.796896
hsacirc_007414	-	-Inf	0.796896
hsacirc_007417	-	0.0479345	0.993178
hsacirc_007422	-	-Inf	0.432801
hsacirc_007432	-	2.16993	0.520601
hsacirc_007435	-	-Inf	0.796896
hsacirc_007437	-	-Inf	0.796896
hsacirc_007438	-	-Inf	0.190649
hsacirc_007440	-	-Inf	0.470422
hsacirc_007441	-	-0.415037	1
hsacirc_007443	-	0.584963	0.763283
hsacirc_007450	-	-1.12131	0.558081
hsacirc_007452	-	2.16993	0.600621
hsacirc_007453	-	-1.152	0.948859
hsacirc_007454	-	-1.24511	0.720647
hsacirc_007457	-	-Inf	0.892474
hsacirc_007462	-	0.228819	0.891136
hsacirc_007468	-	2.16993	0.777742
hsacirc_007472	-	-Inf	0.892474
hsacirc_007476	-	-0.415037	1
hsacirc_007478	-	-Inf	0.713286
hsacirc_007480	-	-Inf	0.302187
hsacirc_007482	-	-1.68806	0.396257
hsacirc_007483	-	1.16993	0.829853
hsacirc_007491	-	-Inf	0.635054
hsacirc_007492	-	-Inf	0.635054
hsacirc_007496	-	-Inf	0.796896
hsacirc_007497	-	-Inf	0.371575
hsacirc_007509	-	-2.58496	0.339121
hsacirc_007510	-	Inf	0.236584
hsacirc_007511	-	2.75489	0.434583
hsacirc_007513	-	1.16993	0.9066
hsacirc_007515	-	-Inf	0.635054
hsacirc_007527	-	-1.152	0.697533
hsacirc_007528	-	-Inf	0.796896
hsacirc_007532	-	2.16993	0.600621
hsacirc_007535	-	-0.63743	0.89345
hsacirc_007544	-	-2.83007	0.462817
hsacirc_007550	-	-0.152003	1
hsacirc_007552	-	-Inf	0.713286
hsacirc_007554	-	-Inf	0.713286
hsacirc_007565	-	Inf	0.300267
hsacirc_007566	-	Inf	0.158029
hsacirc_007568	-	2.39232	0.44689
hsacirc_007569	-	0.754888	0.822268
hsacirc_007586	-	0.169925	1
hsacirc_007588	-	-1	0.757333
hsacirc_007589	-	3.49185	0.391448
hsacirc_007590	-	-Inf	0.796896
hsacirc_007598	-	2.75489	0.593691
hsacirc_007608	-	-Inf	0.892474
hsacirc_007613	-	-0.0524674	1
hsacirc_007617	-	1.16993	0.9066
hsacirc_007619	-	-Inf	0.514828
hsacirc_007627	-	-Inf	0.796896
hsacirc_007628	-	-0.327575	0.899627
hsacirc_007633	-	-1.63743	0.67043
hsacirc_007636	-	-2.91754	0.434517
hsacirc_007637	-	3.16993	0.474514
hsacirc_007638	-	-Inf	0.280894
hsacirc_007640	-	-Inf	0.346852
hsacirc_007642	-	-0.415037	1
hsacirc_007646	-	0.739291	0.689027
hsacirc_007648	-	-Inf	0.222131
hsacirc_007653	-	0.584963	0.763283
hsacirc_007656	-	0.754888	0.914553
hsacirc_007657	-	2.75489	0.434583
hsacirc_007659	-	-1.68806	0.488172
hsacirc_007660	-	2.75489	0.593691
hsacirc_007691	-	-Inf	0.635054
hsacirc_007702	-	-2.49304	0.281639
hsacirc_007706	-	0.584963	1
hsacirc_007713	-	0.584963	0.917795
hsacirc_007714	-	-Inf	0.713286
hsacirc_007715	-	-0.415037	1
hsacirc_007716	-	-Inf	0.432801
hsacirc_007717	-	0.169925	1
hsacirc_007728	-	-Inf	0.635054
hsacirc_007732	-	-Inf	0.568974
hsacirc_007738	-	0.432959	0.913721
hsacirc_007740	-	-0.415037	0.846737
hsacirc_007750	-	-0.63743	0.980625
hsacirc_007755	-	0.169925	1
hsacirc_007757	-	-Inf	0.796896
hsacirc_007761	-	-Inf	0.514828
hsacirc_007763	-	-Inf	0.796896
hsacirc_007764	-	0.432959	0.986521
hsacirc_007779	-	-Inf	0.796896
hsacirc_007780	-	-Inf	0.371575
hsacirc_007787	-	Inf	0.0514506
hsacirc_007790	-	-Inf	0.892474
hsacirc_007792	-	-2.22239	0.463647
hsacirc_007794	-	-Inf	0.796896
hsacirc_007798	-	-Inf	0.635054
hsacirc_007800	-	-Inf	0.796896
hsacirc_007806	-	-Inf	0.796896
hsacirc_007813	-	-Inf	0.432801
hsacirc_007817	-	0.584963	1
hsacirc_007824	-	-0.0524674	1
hsacirc_007825	-	-Inf	0.568974
hsacirc_007826	-	-Inf	0.796896
hsacirc_007829	-	-2.63743	0.524529
hsacirc_007830	-	1.43296	0.658808
hsacirc_007833	-	-Inf	0.163716
hsacirc_007836	-	0.169925	1
hsacirc_007837	-	-Inf	0.796896
hsacirc_007846	-	0.432959	0.913721
hsacirc_007847	-	2.16993	0.520601
hsacirc_007854	-	0.169925	1
hsacirc_007860	-	0.0324215	1
hsacirc_007861	-	-1.152	0.697533
hsacirc_007867	-	-0.415037	1
hsacirc_007870	-	-0.415037	1
hsacirc_007880	-	-0.415037	1
hsacirc_007881	-	-Inf	0.432801
hsacirc_007890	-	-Inf	0.470422
hsacirc_007897	-	-1.09311	0.596337
hsacirc_007901	-	-Inf	0.568974
hsacirc_007903	-	-0.415037	1
hsacirc_007910	-	-Inf	0.635054
hsacirc_007914	-	-1.88897	0.476576
hsacirc_007918	-	0.169925	0.970554
hsacirc_007919	-	-2.87447	0.162069
hsacirc_007922	-	-Inf	0.432801
hsacirc_007925	-	-0.152003	1
hsacirc_007930	-	0.584963	1
hsacirc_007935	-	Inf	0.236584
hsacirc_007936	-	2.97728	0.367745
hsacirc_007937	-	Inf	0.300267
hsacirc_007938	-	-0.192645	1
hsacirc_007941	-	0.655352	0.829455
hsacirc_007943	-	1.01792	0.685159
hsacirc_007946	-	-0.415037	0.867795
hsacirc_007958	-	-Inf	0.399736
hsacirc_007961	-	-2	0.543231
hsacirc_007963	-	-2.17585	0.278076
hsacirc_007967	-	-Inf	0.635054
hsacirc_007969	-	-Inf	0.713286
hsacirc_007971	-	-Inf	0.796896
hsacirc_007972	-	-Inf	0.470422
hsacirc_007974	-	Inf	0.300267
hsacirc_007977	-	0.295456	0.88365
hsacirc_007987	-	-Inf	0.892474
hsacirc_007991	-	-Inf	0.796896
hsacirc_007992	up	Inf	0.000799675
hsacirc_007994	-	1.16993	0.9066
hsacirc_007995	-	-Inf	0.635054
hsacirc_008007	-	-3.89616	0.0787298
hsacirc_008021	-	-Inf	0.796896
hsacirc_008022	-	-0.530515	0.931368
hsacirc_008025	-	-0.152003	1
hsacirc_008032	-	-Inf	0.635054
hsacirc_008044	-	0.710493	0.794929
hsacirc_008051	-	-0.152003	1
hsacirc_008054	-	-Inf	0.399736
hsacirc_008056	-	-0.415037	1
hsacirc_008057	-	1.27684	0.543021
hsacirc_008061	-	-1.152	0.828966
hsacirc_008062	down	-Inf	0.0177531
hsacirc_008064	-	2.16993	0.777742
hsacirc_008066	-	-Inf	0.635054
hsacirc_008071	-	Inf	0.193642
hsacirc_008077	-	1.16993	0.9066
hsacirc_008080	-	3.62936	0.188198
hsacirc_008084	-	0.584963	0.917795
hsacirc_008093	-	2.16993	0.777742
hsacirc_008098	-	-0.152003	1
hsacirc_008099	-	-Inf	0.713286
hsacirc_008103	-	Inf	0.300267
hsacirc_008110	-	1.62936	0.393433
hsacirc_008122	-	0.584963	1
hsacirc_008125	-	2.16993	0.777742
hsacirc_008129	-	3.16993	0.103618
hsacirc_008137	-	0.169925	1
hsacirc_008141	-	-Inf	0.635054
hsacirc_008154	-	-Inf	0.713286
hsacirc_008158	-	1.16993	0.717593
hsacirc_008160	-	-Inf	0.796896
hsacirc_008171	-	-Inf	0.324023
hsacirc_008175	-	-Inf	0.713286
hsacirc_008179	-	2.75489	0.434583
hsacirc_008182	-	3.20343e-16	1
hsacirc_008183	-	2.16993	0.600621
hsacirc_008192	-	0.584963	1
hsacirc_008193	-	-Inf	0.568974
hsacirc_008196	-	-0.546282	0.795046
hsacirc_008197	-	1.16993	0.9066
hsacirc_008204	-	-1.91754	0.572519
hsacirc_008207	-	Inf	0.300267
hsacirc_008209	-	-Inf	0.635054
hsacirc_008210	-	-Inf	0.796896
hsacirc_008216	-	-Inf	0.568974
hsacirc_008219	-	-Inf	0.635054
hsacirc_008224	-	2.49185	0.509
hsacirc_008228	-	-2.078	0.355847
hsacirc_008231	-	-Inf	0.240438
hsacirc_008233	-	-Inf	0.222131
hsacirc_008238	-	0.584963	1
hsacirc_008246	-	-Inf	0.514828
hsacirc_008249	-	-Inf	0.432801
hsacirc_008250	-	-Inf	0.635054
hsacirc_008252	-	-Inf	0.796896
hsacirc_008253	-	-Inf	0.302187
hsacirc_008257	-	-Inf	0.796896
hsacirc_008261	-	-2.10309	0.399935
hsacirc_008268	-	-0.756074	0.738223
hsacirc_008270	-	-1.83007	0.603211
hsacirc_008272	-	-Inf	0.470422
hsacirc_008273	-	-0.152003	1
hsacirc_008275	-	0.906891	0.810518
hsacirc_008277	-	-Inf	0.713286
hsacirc_008281	-	-Inf	0.222131
hsacirc_008284	-	3.49185	0.222234
hsacirc_008285	-	Inf	0.158029
hsacirc_008290	-	1.16993	0.829853
hsacirc_008291	-	0.169925	1
hsacirc_008292	-	1.16993	0.9066
hsacirc_008293	-	-1.83007	0.758261
hsacirc_008300	-	-Inf	0.514828
hsacirc_008305	-	-Inf	0.432801
hsacirc_008307	-	-Inf	0.432801
hsacirc_008308	-	-Inf	0.399736
hsacirc_008314	-	-Inf	0.796896
hsacirc_008320	-	Inf	0.300267
hsacirc_008322	-	-Inf	0.470422
hsacirc_008327	-	-0.344648	0.944174
hsacirc_008328	-	2.16993	0.777742
hsacirc_008329	-	1.16993	0.829853
hsacirc_008330	-	-0.339089	0.905685
hsacirc_008344	-	Inf	0.300267
hsacirc_008345	-	-Inf	0.635054
hsacirc_008346	-	Inf	0.193642
hsacirc_008347	-	-Inf	0.163716
hsacirc_008348	-	Inf	0.300267
hsacirc_008350	-	-Inf	0.0521484
hsacirc_008353	-	-Inf	0.470422
hsacirc_008360	-	-3.80735	0.0877257
hsacirc_008362	-	-Inf	0.302187
hsacirc_008363	-	-1	0.87476
hsacirc_008366	-	-Inf	0.796896
hsacirc_008374	-	-3.22239	0.339389
hsacirc_008376	-	-Inf	0.514828
hsacirc_008377	-	2.16993	0.777742
hsacirc_008389	-	-Inf	0.892474
hsacirc_008391	-	-0.830075	0.924844
hsacirc_008393	-	2.75489	0.434583
hsacirc_008399	-	-Inf	0.892474
hsacirc_008400	-	1.16993	0.9066
hsacirc_008401	-	-Inf	0.432801
hsacirc_008404	-	0.169925	1
hsacirc_008419	-	-0.415037	1
hsacirc_008421	-	-Inf	0.324023
hsacirc_008422	-	-1.28951	0.573968
hsacirc_008423	-	-Inf	0.713286
hsacirc_008426	-	1.58496	0.701108
hsacirc_008427	-	-1.152	0.828966
hsacirc_008428	-	-Inf	0.190649
hsacirc_008431	-	-Inf	0.796896
hsacirc_008439	-	-1.76867	0.522009
hsacirc_008461	-	0.169925	1
hsacirc_008462	-	1.75489	0.593976
hsacirc_008465	-	-3.58496	0.114962
hsacirc_008470	-	-0.415037	1
hsacirc_008471	-	-Inf	0.635054
hsacirc_008474	-	-0.415037	1
hsacirc_008481	-	-Inf	0.399736
hsacirc_008488	-	1.65535	0.579545
hsacirc_008491	-	-Inf	0.20562
hsacirc_008495	-	1.75489	0.593976
hsacirc_008498	-	2.16993	0.520601
hsacirc_008499	-	-1.28951	0.538903
hsacirc_008509	-	0.169925	1
hsacirc_008510	-	-1.152	0.948859
hsacirc_008511	-	-Inf	0.346852
hsacirc_008515	-	-0.152003	1
hsacirc_008525	-	-Inf	0.432801
hsacirc_008532	-	-0.63743	0.980625
hsacirc_008533	-	-1.152	0.828966
hsacirc_008540	-	-Inf	0.371575
hsacirc_008549	-	-Inf	0.635054
hsacirc_008550	-	-Inf	0.796896
hsacirc_008551	-	-Inf	0.371575
hsacirc_008552	-	3.16993	0.474514
hsacirc_008557	-	-Inf	0.635054
hsacirc_008564	-	-0.415037	0.929906
hsacirc_008565	-	-Inf	0.432801
hsacirc_008569	-	Inf	0.0801625
hsacirc_008571	-	-1.91754	0.572519
hsacirc_008572	-	-0.49304	0.898693
hsacirc_008578	-	Inf	0.193642
hsacirc_008579	-	-0.830075	0.924844
hsacirc_008594	-	1.16993	0.750277
hsacirc_008595	-	-Inf	0.635054
hsacirc_008598	-	-Inf	0.796896
hsacirc_008599	-	-Inf	0.280894
hsacirc_008603	-	Inf	0.0514506
hsacirc_008610	-	-Inf	0.635054
hsacirc_008613	-	-0.830075	0.822445
hsacirc_008619	-	1.16993	0.9066
hsacirc_008620	-	-Inf	0.346852
hsacirc_008624	-	-1.05247	0.790236
hsacirc_008626	-	-0.830075	0.924844
hsacirc_008630	-	-Inf	0.260101
hsacirc_008631	-	0.684498	0.774925
hsacirc_008638	-	Inf	0.300267
hsacirc_008640	-	-Inf	0.514828
hsacirc_008642	down	-Inf	0.0117003
hsacirc_008647	-	-0.63743	0.789935
hsacirc_008653	-	-Inf	0.568974
hsacirc_008655	-	-Inf	0.713286
hsacirc_008662	-	-Inf	0.796896
hsacirc_008665	-	-Inf	0.635054
hsacirc_008668	-	-Inf	0.796896
hsacirc_008670	-	1.16993	0.9066
hsacirc_008673	-	1.75489	0.72648
hsacirc_008683	-	0.432959	0.986521
hsacirc_008684	-	1.75489	0.72648
hsacirc_008688	-	3.20343e-16	1
hsacirc_008689	-	Inf	0.403375
hsacirc_008690	-	Inf	0.0801625
hsacirc_008691	-	-Inf	0.713286
hsacirc_008693	-	-Inf	0.796896
hsacirc_008696	-	-0.415037	1
hsacirc_008700	-	-3.152	0.361225
hsacirc_008701	-	-Inf	0.432801
hsacirc_008705	-	1.58496	0.701108
hsacirc_008713	-	-Inf	0.222131
hsacirc_008723	-	-1.078	0.726817
hsacirc_008726	-	-Inf	0.892474
hsacirc_008731	-	2.75489	0.434583
hsacirc_008742	-	-Inf	0.151593
hsacirc_008747	-	-Inf	0.635054
hsacirc_008749	-	-2.95936	0.233093
hsacirc_008751	-	0.169925	1
hsacirc_008760	-	2.75489	0.434583
hsacirc_008765	-	0.111031	0.979306
hsacirc_008778	-	2.16993	0.777742
hsacirc_008779	-	-0.475792	0.820053
hsacirc_008785	-	0.169925	1
hsacirc_008789	-	-Inf	0.635054
hsacirc_008796	-	-0.959358	0.672655
hsacirc_008800	-	-0.704544	0.812147
hsacirc_008802	-	-Inf	0.635054
hsacirc_008804	-	0.169925	0.995832
hsacirc_008805	-	1.75489	0.72648
hsacirc_008807	-	-Inf	0.371575
hsacirc_008814	-	-3.87447	0.166142
hsacirc_008816	-	-0.415037	1
hsacirc_008818	-	-Inf	0.280894
hsacirc_008827	-	-Inf	0.470422
hsacirc_008828	-	-Inf	0.713286
hsacirc_008830	-	1.75489	0.72648
hsacirc_008833	-	-Inf	0.713286
hsacirc_008840	-	-Inf	0.514828
hsacirc_008848	-	-Inf	0.796896
hsacirc_008850	-	3.49185	0.222234
hsacirc_008852	-	Inf	0.193642
hsacirc_008855	-	-Inf	0.892474
hsacirc_008858	-	1.16993	0.689817
hsacirc_008860	-	-Inf	0.713286
hsacirc_008863	-	0.847997	0.855687
hsacirc_008871	-	-1.09311	0.679474
hsacirc_008873	-	-Inf	0.0737253
hsacirc_008877	-	-Inf	0.796896
hsacirc_008880	-	-0.584963	0.831844
hsacirc_008889	-	1.16993	0.9066
hsacirc_008895	-	-Inf	0.796896
hsacirc_008898	-	0.584963	1
hsacirc_008899	-	1.16993	0.9066
hsacirc_008904	-	-Inf	0.796896
hsacirc_008908	-	0.169925	1
hsacirc_008915	-	0.36257	0.973368
hsacirc_008918	-	Inf	0.300267
hsacirc_008920	-	-1.35364	0.616964
hsacirc_008923	-	-2	0.709157
hsacirc_008927	-	-0.49304	0.898693
hsacirc_008934	-	-Inf	0.796896
hsacirc_008935	-	1.58496	0.701108
hsacirc_008937	-	-Inf	0.514828
hsacirc_008938	-	0.847997	0.855687
hsacirc_008943	-	-3.158	0.107969
hsacirc_008945	-	-Inf	0.635054
hsacirc_008950	-	-0.289507	1
hsacirc_008959	-	1.16993	0.9066
hsacirc_008960	-	1.16993	0.784571
hsacirc_008962	-	-Inf	0.399736
hsacirc_008963	-	0.947533	0.771863
hsacirc_008966	-	-Inf	0.514828
hsacirc_008970	-	1.75489	0.72648
hsacirc_008971	-	-1.152	0.697533
hsacirc_008986	-	Inf	0.125849
hsacirc_008992	-	-0.174029	0.979755
hsacirc_008998	-	-2	0.709157
hsacirc_009001	-	1	0.710333
hsacirc_009005	-	-Inf	0.432801
hsacirc_009011	-	-2.28951	0.439877
hsacirc_009017	-	-Inf	0.713286
hsacirc_009020	-	-1.41504	0.876365
hsacirc_009030	-	-2.28951	0.627172
hsacirc_009031	-	3.16993	0.474514
hsacirc_009040	-	-2.28951	0.627172
hsacirc_009042	-	-0.415037	1
hsacirc_009043	-	Inf	0.300267
hsacirc_009048	-	-Inf	0.635054
hsacirc_009051	-	0.655352	0.829455
hsacirc_009060	-	-2.58496	0.21916
hsacirc_009061	-	-Inf	0.104412
hsacirc_009065	-	1.75489	0.43925
hsacirc_009066	-	-Inf	0.635054
hsacirc_009068	-	Inf	0.300267
hsacirc_009071	-	-3.28951	0.318861
[truncated: 2,497 more rows]
