# Supplementary material for: The regulation of hsacirc_004413 promotes proliferation and drug resistance of gastric cancer cells by acting as a competing endogenous RNA for miR-145-5p
Source: PeerJ. 2022 Apr 7;10:e12629. doi: 10.7717/peerj.12629 (PMC8995023; doi:10.7717/peerj.12629)
Supplement: Supplemental Information 4 [file peerj-10-12629-s004.xlsx]

## Sheet: Sheet1
Sample	SGC7901	SGC79015Fu
hsacirc_004180	4.97689	10.2933
hsacirc_017511	5.5465	10.4087
hsacirc_004413	0	10.1679
hsacirc_011114	0	9.40975
hsacirc_001517	0	9.70891
hsacirc_010310	0	9.61592
hsacirc_007114	0	12.3074
hsacirc_007992	0	12.0113
hsacirc_010258	0	11.515
hsacirc_013827	0	10.9933
hsacirc_005415	11.4544	8.03463
hsacirc_002890	10.1016	5.73454
hsacirc_012489	10.3577	5.73454
hsacirc_013780	11.1977	6.72093
hsacirc_016982	10.7385	6.72093
hsacirc_012764	10.5312	6.72093
hsacirc_018541	10.5312	6.72093
hsacirc_012009	12.2068	0
hsacirc_017116	9.68698	0
hsacirc_001366	9.60462	0
hsacirc_007214	9.54698	0
hsacirc_010680	9.54698	0
hsacirc_004447	9.45595	0
hsacirc_001152	9.32491	0
hsacirc_011100	9.29019	0
hsacirc_012181	9.29019	0
hsacirc_012534	10.6037	0
hsacirc_002517	10.2714	0
hsacirc_008642	10.2714	0
hsacirc_008062	9.97616	0
hsacirc_019798	10.0814	0
