# Supplementary material for: The regulation of hsacirc_004413 promotes proliferation and drug resistance of gastric cancer cells by acting as a competing endogenous RNA for miR-145-5p
Source: PeerJ. 2022 Apr 7;10:e12629. doi: 10.7717/peerj.12629 (PMC8995023; doi:10.7717/peerj.12629)
Supplement: Supplemental Information 5 [file peerj-10-12629-s005.xlsx]

## Sheet: Sheet1
circBase_ID	id	baseMean	baseMeanA	baseMeanB	foldChange	log2FoldChange	pval	padj
-	hsacirc_007114	72.75	0	145.5	Inf	Inf	0.000633119	1
-	hsacirc_007992	59.25	0	118.5	Inf	Inf	0.000799675	1
-	hsacirc_010258	42	0	84	Inf	Inf	0.00134611	1
hsa_circ_0002874	hsacirc_012009	103.333	206.667	0	0	-Inf	0.00184139	1
-	hsacirc_013827	29.25	0	58.5	Inf	Inf	0.00260343	1
hsa_circ_0007717	hsacirc_012534	34	68	0	0	-Inf	0.00770856	1
hsa_circ_0004650	hsacirc_004413	16.5	0	33	Inf	Inf	0.0101881	1
hsa_circ_0023966	hsacirc_002517	27	54	0	0	-Inf	0.0117003	1
hsa_circ_0004822	hsacirc_008642	27	54	0	0	-Inf	0.0117003	1
hsa_circ_0000192	hsacirc_019798	23.6667	47.3333	0	0	-Inf	0.015234	1
hsa_circ_0006370	hsacirc_008062	22	44	0	0	-Inf	0.0177531	1
hsa_circ_0001868	hsacirc_013780	52.8333	102.667	3	0.0292208	-5.09686	0.0202883	1
hsa_circ_0021570	hsacirc_001517	12	0	24	Inf	Inf	0.023265	1
hsa_circ_0000372	hsacirc_017116	18	36	0	0	-Inf	0.0273873	1
-	hsacirc_010310	11.25	0	22.5	Inf	Inf	0.0277931	1
hsa_circ_0006151	hsacirc_012489	29.4167	57.3333	1.5	0.0261628	-5.25634	0.0282581	1
hsa_circ_0006743	hsacirc_001366	17	34	0	0	-Inf	0.0310216	1
hsa_circ_0006893	hsacirc_016982	38.8333	74.6667	3	0.0401786	-4.63743	0.0333983	1
-	hsacirc_007214	16.3333	32.6667	0	0	-Inf	0.033836	1
hsa_circ_0078607	hsacirc_010680	16.3333	32.6667	0	0	-Inf	0.033836	1
hsa_circ_0075796	hsacirc_004180	18.6667	1.33333	36	27	4.75489	0.0372523	1
-	hsacirc_004447	15.3333	30.6667	0	0	-Inf	0.0387733	1
hsa_circ_0012152	hsacirc_002890	24.75	48	1.5	0.03125	-5	0.038956	1
hsa_circ_0057829	hsacirc_011114	9.75	0	19.5	Inf	Inf	0.0415481	1
hsa_circ_0067716	hsacirc_012764	33.8333	64.6667	3	0.0463918	-4.42999	0.0422326	1
hsa_circ_0008039	hsacirc_018541	33.8333	64.6667	3	0.0463918	-4.42999	0.0422326	1
hsa_circ_0002805	hsacirc_005415	65.0833	122.667	7.5	0.0611413	-4.03171	0.0466711	1
hsa_circ_0045933	hsacirc_001152	14	28	0	0	-Inf	0.0470611	1
hsa_circ_0007956	hsacirc_017511	20.5	2	39	19.5	4.2854	0.0473141	1
-	hsacirc_011100	13.6667	27.3333	0	0	-Inf	0.0495139	1
hsa_circ_0008732	hsacirc_012181	13.6667	27.3333	0	0	-Inf	0.0495139	1
-	hsacirc_008603	9	0	18	Inf	Inf	0.0514506	1
hsa_circ_0067682	hsacirc_007787	9	0	18	Inf	Inf	0.0514506	1
-	hsacirc_009363	9	0	18	Inf	Inf	0.0514506	1
hsa_circ_0002871	hsacirc_008350	13.3333	26.6667	0	0	-Inf	0.0521484	1
hsa_circ_0072309	hsacirc_012194	144.5	274	15	0.0547445	-4.19114	0.0522593	1
hsa_circ_0001247	hsacirc_017021	27.5	52	3	0.0576923	-4.11548	0.0605269	1
hsa_circ_0003502	hsacirc_018124	19.4167	37.3333	1.5	0.0401786	-4.63743	0.0630685	1
-	hsacirc_005164	8.25	0	16.5	Inf	Inf	0.0640385	1
-	hsacirc_011461	8.25	0	16.5	Inf	Inf	0.0640385	1
-	hsacirc_010687	8.25	0	16.5	Inf	Inf	0.0640385	1
hsa_circ_0008928	hsacirc_000059	8.25	0	16.5	Inf	Inf	0.0640385	1
hsa_circ_0082096	hsacirc_011143	8.25	0	16.5	Inf	Inf	0.0640385	1
hsa_circ_0004594	hsacirc_012631	12	24	0	0	-Inf	0.0650858	1
hsa_circ_0003102	hsacirc_013399	11.6667	23.3333	0	0	-Inf	0.0691836	1
hsa_circ_0007788	hsacirc_013928	11.3333	22.6667	0	0	-Inf	0.0737253	1
-	hsacirc_008873	11.3333	22.6667	0	0	-Inf	0.0737253	1
hsa_circ_0004792	hsacirc_000183	10.8333	0.666667	21	31.5	4.97728	0.0740866	1
hsa_circ_0000450	hsacirc_008007	23.8333	44.6667	3	0.0671642	-3.89616	0.0787298	1
hsa_circ_0005791	hsacirc_007292	11	22	0	0	-Inf	0.0787488	1
-	hsacirc_004718	11	22	0	0	-Inf	0.0787488	1
hsa_circ_0000997	hsacirc_016140	11	22	0	0	-Inf	0.0787488	1
hsa_circ_0006757	hsacirc_018998	30.5833	56.6667	4.5	0.0794118	-3.6545	0.0800454	1
hsa_circ_0008650	hsacirc_012262	7.5	0	15	Inf	Inf	0.0801625	1
hsa_circ_0005916	hsacirc_017514	7.5	0	15	Inf	Inf	0.0801625	1
hsa_circ_0042428	hsacirc_000494	7.5	0	15	Inf	Inf	0.0801625	1
hsa_circ_0045537	hsacirc_011886	7.5	0	15	Inf	Inf	0.0801625	1
hsa_circ_0001825	hsacirc_008569	7.5	0	15	Inf	Inf	0.0801625	1
hsa_circ_0004762	hsacirc_008690	7.5	0	15	Inf	Inf	0.0801625	1
-	hsacirc_018783	7.5	0	15	Inf	Inf	0.0801625	1
hsa_circ_0000067	hsacirc_001376	10.6667	21.3333	0	0	-Inf	0.0842941	1
-	hsacirc_012247	10.6667	21.3333	0	0	-Inf	0.0842941	1
-	hsacirc_007303	10.6667	21.3333	0	0	-Inf	0.0842941	1
hsa_circ_0006364	hsacirc_002648	22.8333	42.6667	3	0.0703125	-3.83007	0.0853279	1
hsa_circ_0004086	hsacirc_008360	22.5	42	3	0.0714286	-3.80735	0.0877257	1
hsa_circ_0003602	hsacirc_015662	16.4167	31.3333	1.5	0.0478723	-4.38466	0.0881681	1
hsa_circ_0005623	hsacirc_011913	22.1667	41.3333	3	0.0725806	-3.78427	0.0902316	1
hsa_circ_0029308	hsacirc_018398	10.3333	20.6667	0	0	-Inf	0.0903992	1
hsa_circ_0007113	hsacirc_013524	21.5	40	3	0.075	-3.73697	0.0955918	1
hsa_circ_0007120	hsacirc_009149	10	20	0	0	-Inf	0.097097	1
hsa_circ_0003507	hsacirc_006539	10	20	0	0	-Inf	0.097097	1
hsa_circ_0000818	hsacirc_020062	10	20	0	0	-Inf	0.097097	1
hsa_circ_0000672	hsacirc_006610	21.1667	39.3333	3	0.0762712	-3.71272	0.098459	1
hsa_circ_0004669	hsacirc_002827	6.75	0	13.5	Inf	Inf	0.100053	1
hsa_circ_0075705	hsacirc_005890	6.75	0	13.5	Inf	Inf	0.100053	1
hsa_circ_0007353	hsacirc_004810	11.9167	1.33333	22.5	16.875	4.07682	0.100718	1
hsa_circ_0008234	hsacirc_008129	26.6667	5.33333	48	9	3.16993	0.103618	1
hsa_circ_0067013	hsacirc_009061	9.66667	19.3333	0	0	-Inf	0.104412	1
hsa_circ_0006225	hsacirc_012721	9.33333	0.666667	18	27	4.75489	0.106145	1
hsa_circ_0000741	hsacirc_008943	89.3333	160.667	18	0.112033	-3.158	0.107969	1
hsa_circ_0006646	hsacirc_020253	57.3333	102.667	12	0.116883	-3.09686	0.110113	1
-	hsacirc_000588	43.8333	78.6667	9	0.114407	-3.12776	0.110592	1
hsa_circ_0004075	hsacirc_008465	19.5	36	3	0.0833333	-3.58496	0.114962	1
hsa_circ_0006877	hsacirc_015571	19.5	36	3	0.0833333	-3.58496	0.114962	1
hsa_circ_0001258	hsacirc_005776	19.5	36	3	0.0833333	-3.58496	0.114962	1
hsa_circ_0006968	hsacirc_006129	11.1667	1.33333	21	15.75	3.97728	0.116398	1
-	hsacirc_001683	11.1667	1.33333	21	15.75	3.97728	0.116398	1
hsa_circ_0006427	hsacirc_015494	24.5833	44.6667	4.5	0.100746	-3.3112	0.117171	1
hsa_circ_0012397	hsacirc_006700	14.0833	26.6667	1.5	0.05625	-4.152	0.118565	1
hsa_circ_0001485	hsacirc_019120	35.75	64	7.5	0.117188	-3.09311	0.119611	1
hsa_circ_0012400	hsacirc_019577	9	18	0	0	-Inf	0.120959	1
-	hsacirc_001387	9	18	0	0	-Inf	0.120959	1
-	hsacirc_006133	9	18	0	0	-Inf	0.120959	1
hsa_circ_0073371	hsacirc_011503	9	18	0	0	-Inf	0.120959	1
hsa_circ_0006501	hsacirc_002224	60.4167	107.333	13.5	0.125776	-2.99107	0.121079	1
hsa_circ_0000398	hsacirc_000122	13.75	26	1.5	0.0576923	-4.11548	0.124043	1
-	hsacirc_012073	6	0	12	Inf	Inf	0.125849	1
-	hsacirc_003481	6	0	12	Inf	Inf	0.125849	1
hsa_circ_0006677	hsacirc_014566	6	0	12	Inf	Inf	0.125849	1
hsa_circ_0008129	hsacirc_014613	6	0	12	Inf	Inf	0.125849	1
hsa_circ_0021486	hsacirc_008986	6	0	12	Inf	Inf	0.125849	1
hsa_circ_0020906	hsacirc_004125	6	0	12	Inf	Inf	0.125849	1
hsa_circ_0002464	hsacirc_003643	6	0	12	Inf	Inf	0.125849	1
hsa_circ_0030042	hsacirc_016899	6	0	12	Inf	Inf	0.125849	1
hsa_circ_0006590	hsacirc_013354	6	0	12	Inf	Inf	0.125849	1
-	hsacirc_015971	6	0	12	Inf	Inf	0.125849	1
-	hsacirc_000968	6	0	12	Inf	Inf	0.125849	1
hsa_circ_0007132	hsacirc_011561	6	0	12	Inf	Inf	0.125849	1
-	hsacirc_005054	6	0	12	Inf	Inf	0.125849	1
-	hsacirc_013711	6	0	12	Inf	Inf	0.125849	1
hsa_circ_0007693	hsacirc_005512	8.66667	17.3333	0	0	-Inf	0.130351	1
hsa_circ_0017636	hsacirc_013216	8.66667	17.3333	0	0	-Inf	0.130351	1
-	hsacirc_001959	8.66667	17.3333	0	0	-Inf	0.130351	1
hsa_circ_0069443	hsacirc_017316	8.66667	17.3333	0	0	-Inf	0.130351	1
hsa_circ_0006824	hsacirc_014580	8.66667	17.3333	0	0	-Inf	0.130351	1
hsa_circ_0004520	hsacirc_019358	8.66667	17.3333	0	0	-Inf	0.130351	1
-	hsacirc_019098	13.0833	24.6667	1.5	0.0608108	-4.03953	0.136095	1
hsa_circ_0000992	hsacirc_003010	49.0833	12.6667	85.5	6.75	2.75489	0.13864	1
hsa_circ_0006629	hsacirc_009742	8.33333	16.6667	0	0	-Inf	0.140524	1
hsa_circ_0007262	hsacirc_011577	8.33333	16.6667	0	0	-Inf	0.140524	1
hsa_circ_0006173	hsacirc_016739	8.33333	16.6667	0	0	-Inf	0.140524	1
hsa_circ_0088087	hsacirc_012431	8.33333	16.6667	0	0	-Inf	0.140524	1
hsa_circ_0005405	hsacirc_005156	8.33333	16.6667	0	0	-Inf	0.140524	1
-	hsacirc_019792	8.33333	16.6667	0	0	-Inf	0.140524	1
hsa_circ_0007162	hsacirc_012645	8.33333	16.6667	0	0	-Inf	0.140524	1
-	hsacirc_009449	14.0833	2.66667	25.5	9.5625	3.25739	0.144531	1
hsa_circ_0007032	hsacirc_002201	12.4167	23.3333	1.5	0.0642857	-3.95936	0.149879	1
-	hsacirc_018162	8	16	0	0	-Inf	0.151593	1
hsa_circ_0007092	hsacirc_011528	8	16	0	0	-Inf	0.151593	1
hsa_circ_0007235	hsacirc_015741	8	16	0	0	-Inf	0.151593	1
hsa_circ_0004379	hsacirc_008742	8	16	0	0	-Inf	0.151593	1
hsa_circ_0000413	hsacirc_014447	7.83333	0.666667	15	22.5	4.49185	0.154508	1
hsa_circ_0007609	hsacirc_000182	12.0833	22.6667	1.5	0.0661765	-3.91754	0.157661	1
hsa_circ_0003823	hsacirc_005575	12.0833	22.6667	1.5	0.0661765	-3.91754	0.157661	1
hsa_circ_0001346	hsacirc_016320	172.083	306.667	37.5	0.122283	-3.03171	0.157926	1
-	hsacirc_011166	5.25	0	10.5	Inf	Inf	0.158029	1
hsa_circ_0008629	hsacirc_005144	5.25	0	10.5	Inf	Inf	0.158029	1
hsa_circ_0020913	hsacirc_019655	5.25	0	10.5	Inf	Inf	0.158029	1
-	hsacirc_005491	5.25	0	10.5	Inf	Inf	0.158029	1
hsa_circ_0058495	hsacirc_014281	5.25	0	10.5	Inf	Inf	0.158029	1
hsa_circ_0001146	hsacirc_018372	5.25	0	10.5	Inf	Inf	0.158029	1
hsa_circ_0062938	hsacirc_008285	5.25	0	10.5	Inf	Inf	0.158029	1
hsa_circ_0001231	hsacirc_018608	5.25	0	10.5	Inf	Inf	0.158029	1
-	hsacirc_016674	5.25	0	10.5	Inf	Inf	0.158029	1
-	hsacirc_019994	5.25	0	10.5	Inf	Inf	0.158029	1
hsa_circ_0073435	hsacirc_015834	5.25	0	10.5	Inf	Inf	0.158029	1
-	hsacirc_007566	5.25	0	10.5	Inf	Inf	0.158029	1
hsa_circ_0070421	hsacirc_009815	11.5	2	21	10.5	3.39232	0.159106	1
hsa_circ_0077168	hsacirc_011127	11.5	2	21	10.5	3.39232	0.159106	1
hsa_circ_0001062	hsacirc_009923	9.66667	1.33333	18	13.5	3.75489	0.159694	1
hsa_circ_0003253	hsacirc_004458	39.9167	69.3333	10.5	0.151442	-2.72316	0.160167	1
hsa_circ_0002882	hsacirc_007919	25	44	6	0.136364	-2.87447	0.162069	1
hsa_circ_0004592	hsacirc_014399	44.6667	77.3333	12	0.155172	-2.68806	0.162315	1
-	hsacirc_014378	7.66667	15.3333	0	0	-Inf	0.163716	1
hsa_circ_0008278	hsacirc_001126	7.66667	15.3333	0	0	-Inf	0.163716	1
hsa_circ_0004565	hsacirc_012899	7.66667	15.3333	0	0	-Inf	0.163716	1
hsa_circ_0002051	hsacirc_011722	7.66667	15.3333	0	0	-Inf	0.163716	1
hsa_circ_0006410	hsacirc_007833	7.66667	15.3333	0	0	-Inf	0.163716	1
hsa_circ_0003295	hsacirc_008347	7.66667	15.3333	0	0	-Inf	0.163716	1
hsa_circ_0008488	hsacirc_019023	29.4167	51.3333	7.5	0.146104	-2.77493	0.164837	1
hsa_circ_0006987	hsacirc_008814	11.75	22	1.5	0.0681818	-3.87447	0.166142	1
hsa_circ_0071654	hsacirc_017231	33.5	58	9	0.155172	-2.68806	0.171086	1
hsa_circ_0071653	hsacirc_016983	126.833	220.667	33	0.149547	-2.74133	0.172886	1
hsa_circ_0019696	hsacirc_019614	11.4167	21.3333	1.5	0.0703125	-3.83007	0.175389	1
hsa_circ_0001746	hsacirc_002641	85	146	24	0.164384	-2.60486	0.176137	1
hsa_circ_0006150	hsacirc_001815	19.5833	34.6667	4.5	0.129808	-2.94555	0.176362	1
hsa_circ_0006758	hsacirc_009579	7.33333	14.6667	0	0	-Inf	0.176772	1
hsa_circ_0000378	hsacirc_015209	7.33333	14.6667	0	0	-Inf	0.176772	1
hsa_circ_0048959	hsacirc_004691	7.33333	14.6667	0	0	-Inf	0.176772	1
-	hsacirc_010883	7.33333	14.6667	0	0	-Inf	0.176772	1
hsa_circ_0005684	hsacirc_000441	7.33333	14.6667	0	0	-Inf	0.176772	1
hsa_circ_0007368	hsacirc_004713	7.33333	14.6667	0	0	-Inf	0.176772	1
hsa_circ_0003910	hsacirc_005807	18.0833	4.66667	31.5	6.75	2.75489	0.177662	1
hsa_circ_0004462	hsacirc_003615	14.4167	3.33333	25.5	7.65	2.93546	0.178698	1
hsa_circ_0005328	hsacirc_018704	11.0833	20.6667	1.5	0.0725806	-3.78427	0.185452	1
hsa_circ_0006294	hsacirc_008080	8.91667	1.33333	16.5	12.375	3.62936	0.188198	1
hsa_circ_0002968	hsacirc_016118	7	14	0	0	-Inf	0.190649	1
hsa_circ_0007061	hsacirc_008428	7	14	0	0	-Inf	0.190649	1
hsa_circ_0004593	hsacirc_001299	7	14	0	0	-Inf	0.190649	1
hsa_circ_0006222	hsacirc_009396	7	14	0	0	-Inf	0.190649	1
hsa_circ_0002398	hsacirc_013245	7	14	0	0	-Inf	0.190649	1
hsa_circ_0000710	hsacirc_007438	7	14	0	0	-Inf	0.190649	1
hsa_circ_0000936	hsacirc_016063	7	14	0	0	-Inf	0.190649	1
hsa_circ_0001074	hsacirc_020332	7	14	0	0	-Inf	0.190649	1
hsa_circ_0008131	hsacirc_011175	7	14	0	0	-Inf	0.190649	1
hsa_circ_0004396	hsacirc_011510	7	14	0	0	-Inf	0.190649	1
hsa_circ_0007750	hsacirc_006431	31.1667	53.3333	9	0.16875	-2.56704	0.192325	1
-	hsacirc_019508	4.5	0	9	Inf	Inf	0.193642	1
-	hsacirc_002059	4.5	0	9	Inf	Inf	0.193642	1
-	hsacirc_008852	4.5	0	9	Inf	Inf	0.193642	1
-	hsacirc_002318	4.5	0	9	Inf	Inf	0.193642	1
-	hsacirc_010391	4.5	0	9	Inf	Inf	0.193642	1
hsa_circ_0017639	hsacirc_004230	4.5	0	9	Inf	Inf	0.193642	1
hsa_circ_0023684	hsacirc_002363	4.5	0	9	Inf	Inf	0.193642	1
-	hsacirc_004015	4.5	0	9	Inf	Inf	0.193642	1
-	hsacirc_005298	4.5	0	9	Inf	Inf	0.193642	1
-	hsacirc_007101	4.5	0	9	Inf	Inf	0.193642	1
-	hsacirc_010483	4.5	0	9	Inf	Inf	0.193642	1
hsa_circ_0033403	hsacirc_001160	4.5	0	9	Inf	Inf	0.193642	1
hsa_circ_0032068	hsacirc_003959	4.5	0	9	Inf	Inf	0.193642	1
hsa_circ_0035056	hsacirc_013656	4.5	0	9	Inf	Inf	0.193642	1
-	hsacirc_012131	4.5	0	9	Inf	Inf	0.193642	1
hsa_circ_0040626	hsacirc_002882	4.5	0	9	Inf	Inf	0.193642	1
-	hsacirc_017053	4.5	0	9	Inf	Inf	0.193642	1
hsa_circ_0002291	hsacirc_000884	4.5	0	9	Inf	Inf	0.193642	1
hsa_circ_0056576	hsacirc_014024	4.5	0	9	Inf	Inf	0.193642	1
hsa_circ_0001021	hsacirc_008578	4.5	0	9	Inf	Inf	0.193642	1
hsa_circ_0061295	hsacirc_000107	4.5	0	9	Inf	Inf	0.193642	1
-	hsacirc_015635	4.5	0	9	Inf	Inf	0.193642	1
hsa_circ_0006091	hsacirc_009128	4.5	0	9	Inf	Inf	0.193642	1
-	hsacirc_004396	4.5	0	9	Inf	Inf	0.193642	1
-	hsacirc_008346	4.5	0	9	Inf	Inf	0.193642	1
-	hsacirc_004915	4.5	0	9	Inf	Inf	0.193642	1
-	hsacirc_000508	4.5	0	9	Inf	Inf	0.193642	1
hsa_circ_0073698	hsacirc_009528	4.5	0	9	Inf	Inf	0.193642	1
hsa_circ_0006528	hsacirc_011795	4.5	0	9	Inf	Inf	0.193642	1
hsa_circ_0006439	hsacirc_011899	4.5	0	9	Inf	Inf	0.193642	1
-	hsacirc_013003	4.5	0	9	Inf	Inf	0.193642	1
hsa_circ_0079950	hsacirc_013635	4.5	0	9	Inf	Inf	0.193642	1
-	hsacirc_014460	4.5	0	9	Inf	Inf	0.193642	1
-	hsacirc_013725	4.5	0	9	Inf	Inf	0.193642	1
-	hsacirc_020026	4.5	0	9	Inf	Inf	0.193642	1
-	hsacirc_002453	4.5	0	9	Inf	Inf	0.193642	1
hsa_circ_0001802	hsacirc_016289	4.5	0	9	Inf	Inf	0.193642	1
hsa_circ_0087960	hsacirc_009855	4.5	0	9	Inf	Inf	0.193642	1
hsa_circ_0088737	hsacirc_008071	4.5	0	9	Inf	Inf	0.193642	1
-	hsacirc_006214	4.5	0	9	Inf	Inf	0.193642	1
hsa_circ_0007966	hsacirc_012861	4.5	0	9	Inf	Inf	0.193642	1
hsa_circ_0001278	hsacirc_018449	10.75	20	1.5	0.075	-3.73697	0.196379	1
-	hsacirc_016651	10.75	20	1.5	0.075	-3.73697	0.196379	1
hsa_circ_0007918	hsacirc_016408	22.3333	38.6667	6	0.155172	-2.68806	0.197071	1
hsa_circ_0008737	hsacirc_011632	14.5	26	3	0.115385	-3.11548	0.197557	1
hsa_circ_0003337	hsacirc_002571	11.8333	2.66667	21	7.875	2.97728	0.201533	1
hsa_circ_0000847	hsacirc_000715	70.9167	119.333	22.5	0.188547	-2.407	0.205297	1
hsa_circ_0000311	hsacirc_006562	6.66667	13.3333	0	0	-Inf	0.20562	1
-	hsacirc_008491	6.66667	13.3333	0	0	-Inf	0.20562	1
hsa_circ_0000734	hsacirc_005645	6.66667	13.3333	0	0	-Inf	0.20562	1
-	hsacirc_000999	6.66667	13.3333	0	0	-Inf	0.20562	1
hsa_circ_0049117	hsacirc_017912	6.66667	13.3333	0	0	-Inf	0.20562	1
hsa_circ_0003426	hsacirc_009744	6.66667	13.3333	0	0	-Inf	0.20562	1
hsa_circ_0066178	hsacirc_003230	6.66667	13.3333	0	0	-Inf	0.20562	1
hsa_circ_0005446	hsacirc_005480	6.66667	13.3333	0	0	-Inf	0.20562	1
hsa_circ_0077659	hsacirc_000346	6.66667	13.3333	0	0	-Inf	0.20562	1
hsa_circ_0089489	hsacirc_013102	6.66667	13.3333	0	0	-Inf	0.20562	1
hsa_circ_0004369	hsacirc_016920	6.66667	13.3333	0	0	-Inf	0.20562	1
hsa_circ_0018315	hsacirc_007203	14.1667	25.3333	3	0.118421	-3.078	0.205708	1
hsa_circ_0006801	hsacirc_005198	14.1667	25.3333	3	0.118421	-3.078	0.205708	1
hsa_circ_0007445	hsacirc_005232	14.1667	25.3333	3	0.118421	-3.078	0.205708	1
hsa_circ_0040809	hsacirc_003611	10.4167	19.3333	1.5	0.0775862	-3.68806	0.208213	1
hsa_circ_0006381	hsacirc_014925	10.4167	19.3333	1.5	0.0775862	-3.68806	0.208213	1
hsa_circ_0079948	hsacirc_018442	16.5833	4.66667	28.5	6.10714	2.6105	0.208351	1
hsa_circ_0000116	hsacirc_014125	51.25	86	16.5	0.19186	-2.38187	0.209247	1
hsa_circ_0000745	hsacirc_005636	639.667	67.3333	1212	18	4.16993	0.211924	1
hsa_circ_0008903	hsacirc_013452	17.5833	30.6667	4.5	0.146739	-2.76867	0.213267	1
hsa_circ_0007613	hsacirc_011268	13.8333	24.6667	3	0.121622	-3.03953	0.214325	1
hsa_circ_0000139	hsacirc_005603	37.3333	62.6667	12	0.191489	-2.38466	0.215833	1
hsa_circ_0001906	hsacirc_012904	41.4167	69.3333	13.5	0.194712	-2.36059	0.217075	1
hsa_circ_0001009	hsacirc_009060	21	36	6	0.166667	-2.58496	0.21916	1
hsa_circ_0007761	hsacirc_019209	168.667	289.333	48	0.165899	-2.59163	0.220808	1
hsa_circ_0037858	hsacirc_002450	10.0833	18.6667	1.5	0.0803571	-3.63743	0.220986	1
-	hsacirc_008281	6.33333	12.6667	0	0	-Inf	0.222131	1
hsa_circ_0017728	hsacirc_016890	6.33333	12.6667	0	0	-Inf	0.222131	1
hsa_circ_0029961	hsacirc_008233	6.33333	12.6667	0	0	-Inf	0.222131	1
hsa_circ_0008554	hsacirc_010789	6.33333	12.6667	0	0	-Inf	0.222131	1
hsa_circ_0008817	hsacirc_006629	6.33333	12.6667	0	0	-Inf	0.222131	1
hsa_circ_0060219	hsacirc_001346	6.33333	12.6667	0	0	-Inf	0.222131	1
hsa_circ_0004705	hsacirc_007648	6.33333	12.6667	0	0	-Inf	0.222131	1
hsa_circ_0001541	hsacirc_008713	6.33333	12.6667	0	0	-Inf	0.222131	1
hsa_circ_0005047	hsacirc_015475	6.33333	12.6667	0	0	-Inf	0.222131	1
hsa_circ_0007017	hsacirc_013026	6.33333	12.6667	0	0	-Inf	0.222131	1
hsa_circ_0001897	hsacirc_002735	6.33333	12.6667	0	0	-Inf	0.222131	1
-	hsacirc_008284	8.16667	1.33333	15	11.25	3.49185	0.222234	1
hsa_circ_0022812	hsacirc_008850	8.16667	1.33333	15	11.25	3.49185	0.222234	1
hsa_circ_0032029	hsacirc_018418	8.16667	1.33333	15	11.25	3.49185	0.222234	1
hsa_circ_0002886	hsacirc_016696	22.4167	7.33333	37.5	5.11364	2.35435	0.223102	1
hsa_circ_0001565	hsacirc_011377	20.6667	35.3333	6	0.169811	-2.558	0.225263	1
-	hsacirc_009258	6.33333	0.666667	12	18	4.16993	0.225769	1
hsa_circ_0046013	hsacirc_009648	6.33333	0.666667	12	18	4.16993	0.225769	1
hsa_circ_0002711	hsacirc_015532	6.33333	0.666667	12	18	4.16993	0.225769	1
hsa_circ_0000384	hsacirc_006979	28.1667	47.3333	9	0.190141	-2.39486	0.22647	1
hsa_circ_0007401	hsacirc_017008	11.0833	2.66667	19.5	7.3125	2.87036	0.228363	1
hsa_circ_0001006	hsacirc_000467	24.0833	40.6667	7.5	0.184426	-2.43888	0.230133	1
hsa_circ_0000660	hsacirc_000104	112.75	38	187.5	4.93421	2.30282	0.230938	1
hsa_circ_0008759	hsacirc_005325	20.3333	34.6667	6	0.173077	-2.53051	0.231623	1
hsa_circ_0003060	hsacirc_013804	23.5	8	39	4.875	2.2854	0.232555	1
hsa_circ_0000024	hsacirc_004088	13.1667	23.3333	3	0.128571	-2.95936	0.233093	1
hsa_circ_0008523	hsacirc_008749	13.1667	23.3333	3	0.128571	-2.95936	0.233093	1
hsa_circ_0006787	hsacirc_003942	9.75	18	1.5	0.0833333	-3.58496	0.23472	1
hsa_circ_0000896	hsacirc_006428	16.5833	28.6667	4.5	0.156977	-2.67138	0.235921	1
hsa_circ_0002570	hsacirc_019934	3.75	0	7.5	Inf	Inf	0.236584	1
hsa_circ_0004477	hsacirc_000504	3.75	0	7.5	Inf	Inf	0.236584	1
hsa_circ_0003132	hsacirc_009524	3.75	0	7.5	Inf	Inf	0.236584	1
hsa_circ_0037011	hsacirc_014335	3.75	0	7.5	Inf	Inf	0.236584	1
hsa_circ_0006008	hsacirc_012234	3.75	0	7.5	Inf	Inf	0.236584	1
-	hsacirc_007510	3.75	0	7.5	Inf	Inf	0.236584	1
-	hsacirc_001611	3.75	0	7.5	Inf	Inf	0.236584	1
hsa_circ_0060927	hsacirc_019304	3.75	0	7.5	Inf	Inf	0.236584	1
hsa_circ_0061744	hsacirc_002688	3.75	0	7.5	Inf	Inf	0.236584	1
hsa_circ_0062239	hsacirc_007935	3.75	0	7.5	Inf	Inf	0.236584	1
-	hsacirc_016397	3.75	0	7.5	Inf	Inf	0.236584	1
hsa_circ_0070939	hsacirc_004945	3.75	0	7.5	Inf	Inf	0.236584	1
hsa_circ_0001426	hsacirc_015940	3.75	0	7.5	Inf	Inf	0.236584	1
hsa_circ_0076479	hsacirc_005458	3.75	0	7.5	Inf	Inf	0.236584	1
-	hsacirc_013546	3.75	0	7.5	Inf	Inf	0.236584	1
hsa_circ_0084890	hsacirc_017818	3.75	0	7.5	Inf	Inf	0.236584	1
hsa_circ_0001333	hsacirc_020013	35	58	12	0.206897	-2.27302	0.239111	1
hsa_circ_0011929	hsacirc_005726	6	12	0	0	-Inf	0.240438	1
hsa_circ_0005719	hsacirc_011747	6	12	0	0	-Inf	0.240438	1
hsa_circ_0032148	hsacirc_002977	6	12	0	0	-Inf	0.240438	1
hsa_circ_0003252	hsacirc_004214	6	12	0	0	-Inf	0.240438	1
-	hsacirc_017607	6	12	0	0	-Inf	0.240438	1
hsa_circ_0006498	hsacirc_018546	6	12	0	0	-Inf	0.240438	1
hsa_circ_0008184	hsacirc_014558	6	12	0	0	-Inf	0.240438	1
hsa_circ_0004599	hsacirc_002999	6	12	0	0	-Inf	0.240438	1
-	hsacirc_019768	6	12	0	0	-Inf	0.240438	1
hsa_circ_0080835	hsacirc_008231	6	12	0	0	-Inf	0.240438	1
hsa_circ_0006814	hsacirc_009144	6	12	0	0	-Inf	0.240438	1
hsa_circ_0086420	hsacirc_014947	6	12	0	0	-Inf	0.240438	1
-	hsacirc_006130	50.6667	83.3333	18	0.216	-2.2109	0.242213	1
-	hsacirc_017952	12.1667	3.33333	21	6.3	2.65535	0.243358	1
hsa_circ_0005077	hsacirc_011531	12.1667	3.33333	21	6.3	2.65535	0.243358	1
-	hsacirc_017020	132.167	45.3333	219	4.83088	2.27229	0.247468	1
hsa_circ_0003221	hsacirc_010114	57.8333	94.6667	21	0.221831	-2.17247	0.249375	1
hsa_circ_0040414	hsacirc_002249	9.41667	17.3333	1.5	0.0865385	-3.53051	0.249419	1
hsa_circ_0002024	hsacirc_011342	9.41667	17.3333	1.5	0.0865385	-3.53051	0.249419	1
hsa_circ_0003618	hsacirc_011895	9.41667	17.3333	1.5	0.0865385	-3.53051	0.249419	1
-	hsacirc_018485	9.41667	17.3333	1.5	0.0865385	-3.53051	0.249419	1
hsa_circ_0005585	hsacirc_007081	9.41667	17.3333	1.5	0.0865385	-3.53051	0.249419	1
hsa_circ_0009121	hsacirc_012264	49.6667	81.3333	18	0.221311	-2.17585	0.249696	1
hsa_circ_0005692	hsacirc_004701	19.3333	32.6667	6	0.183673	-2.44478	0.252362	1
hsa_circ_0003113	hsacirc_010083	19.3333	32.6667	6	0.183673	-2.44478	0.252362	1
hsa_circ_0004671	hsacirc_000828	12.5	22	3	0.136364	-2.87447	0.254207	1
hsa_circ_0001360	hsacirc_005862	155.5	260	51	0.196154	-2.34994	0.256422	1
hsa_circ_0001971	hsacirc_002384	19.0833	6.66667	31.5	4.725	2.24031	0.259014	1
hsa_circ_0030720	hsacirc_016065	44.5833	72.6667	16.5	0.227064	-2.13883	0.259358	1
hsa_circ_0009250	hsacirc_005044	5.66667	11.3333	0	0	-Inf	0.260101	1
-	hsacirc_004878	5.66667	11.3333	0	0	-Inf	0.260101	1
hsa_circ_0030694	hsacirc_020228	5.66667	11.3333	0	0	-Inf	0.260101	1
hsa_circ_0002631	hsacirc_012781	5.66667	11.3333	0	0	-Inf	0.260101	1
hsa_circ_0044880	hsacirc_016692	5.66667	11.3333	0	0	-Inf	0.260101	1
-	hsacirc_006960	5.66667	11.3333	0	0	-Inf	0.260101	1
hsa_circ_0046938	hsacirc_006942	5.66667	11.3333	0	0	-Inf	0.260101	1
-	hsacirc_018464	5.66667	11.3333	0	0	-Inf	0.260101	1
hsa_circ_0004726	hsacirc_016497	5.66667	11.3333	0	0	-Inf	0.260101	1
hsa_circ_0009000	hsacirc_012483	5.66667	11.3333	0	0	-Inf	0.260101	1
hsa_circ_0079048	hsacirc_002028	5.66667	11.3333	0	0	-Inf	0.260101	1
hsa_circ_0008383	hsacirc_005055	5.66667	11.3333	0	0	-Inf	0.260101	1
hsa_circ_0001861	hsacirc_008630	5.66667	11.3333	0	0	-Inf	0.260101	1
hsa_circ_0005704	hsacirc_011326	10.3333	2.66667	18	6.75	2.75489	0.260447	1
hsa_circ_0007723	hsacirc_011399	55.8333	90.6667	21	0.231618	-2.11018	0.262819	1
hsa_circ_0003423	hsacirc_009597	9.08333	16.6667	1.5	0.09	-3.47393	0.265075	1
hsa_circ_0008836	hsacirc_012480	9.08333	16.6667	1.5	0.09	-3.47393	0.265075	1
hsa_circ_0004338	hsacirc_011244	9.08333	16.6667	1.5	0.09	-3.47393	0.265075	1
hsa_circ_0002501	hsacirc_012933	12.1667	21.3333	3	0.140625	-2.83007	0.265915	1
hsa_circ_0006773	hsacirc_009503	25.5	42	9	0.214286	-2.22239	0.266318	1
hsa_circ_0001829	hsacirc_005147	245.583	420.667	70.5	0.167591	-2.57698	0.266472	1
hsa_circ_0089392	hsacirc_019815	18.6667	31.3333	6	0.191489	-2.38466	0.267714	1
hsa_circ_0001686	hsacirc_012760	26	10	42	4.2	2.07039	0.270251	1
-	hsacirc_006565	5.58333	0.666667	10.5	15.75	3.97728	0.27427	1
hsa_circ_0001289	hsacirc_004414	5.58333	0.666667	10.5	15.75	3.97728	0.27427	1
hsa_circ_0001326	hsacirc_001048	18.3333	30.6667	6	0.195652	-2.35364	0.275895	1
-	hsacirc_011698	18.3333	30.6667	6	0.195652	-2.35364	0.275895	1
hsa_circ_0000871	hsacirc_007963	24.8333	40.6667	9	0.221311	-2.17585	0.278076	1
hsa_circ_0032825	hsacirc_014770	11.8333	20.6667	3	0.145161	-2.78427	0.278524	1
hsa_circ_0006107	hsacirc_004218	11.8333	20.6667	3	0.145161	-2.78427	0.278524	1
-	hsacirc_011738	11.8333	20.6667	3	0.145161	-2.78427	0.278524	1
hsa_circ_0004680	hsacirc_007243	5.33333	10.6667	0	0	-Inf	0.280894	1
-	hsacirc_002213	5.33333	10.6667	0	0	-Inf	0.280894	1
hsa_circ_0013298	hsacirc_003022	5.33333	10.6667	0	0	-Inf	0.280894	1
hsa_circ_0003074	hsacirc_007167	5.33333	10.6667	0	0	-Inf	0.280894	1
hsa_circ_0000339	hsacirc_005773	5.33333	10.6667	0	0	-Inf	0.280894	1
hsa_circ_0005082	hsacirc_010628	5.33333	10.6667	0	0	-Inf	0.280894	1
-	hsacirc_006870	5.33333	10.6667	0	0	-Inf	0.280894	1
hsa_circ_0007881	hsacirc_005537	5.33333	10.6667	0	0	-Inf	0.280894	1
hsa_circ_0006290	hsacirc_017354	5.33333	10.6667	0	0	-Inf	0.280894	1
hsa_circ_0000495	hsacirc_019192	5.33333	10.6667	0	0	-Inf	0.280894	1
-	hsacirc_007104	5.33333	10.6667	0	0	-Inf	0.280894	1
-	hsacirc_005361	5.33333	10.6667	0	0	-Inf	0.280894	1
hsa_circ_0008169	hsacirc_001598	5.33333	10.6667	0	0	-Inf	0.280894	1
hsa_circ_0008638	hsacirc_011160	5.33333	10.6667	0	0	-Inf	0.280894	1
hsa_circ_0004203	hsacirc_019037	5.33333	10.6667	0	0	-Inf	0.280894	1
hsa_circ_0005126	hsacirc_007638	5.33333	10.6667	0	0	-Inf	0.280894	1
-	hsacirc_006744	5.33333	10.6667	0	0	-Inf	0.280894	1
hsa_circ_0007849	hsacirc_013507	5.33333	10.6667	0	0	-Inf	0.280894	1
hsa_circ_0007273	hsacirc_005092	5.33333	10.6667	0	0	-Inf	0.280894	1
-	hsacirc_014995	5.33333	10.6667	0	0	-Inf	0.280894	1
hsa_circ_0006997	hsacirc_014066	5.33333	10.6667	0	0	-Inf	0.280894	1
-	hsacirc_008818	5.33333	10.6667	0	0	-Inf	0.280894	1
hsa_circ_0007597	hsacirc_010574	5.33333	10.6667	0	0	-Inf	0.280894	1
-	hsacirc_007166	5.33333	10.6667	0	0	-Inf	0.280894	1
hsa_circ_0008058	hsacirc_009697	5.33333	10.6667	0	0	-Inf	0.280894	1
-	hsacirc_014539	5.33333	10.6667	0	0	-Inf	0.280894	1
hsa_circ_0005685	hsacirc_009462	5.33333	10.6667	0	0	-Inf	0.280894	1
-	hsacirc_002208	5.33333	10.6667	0	0	-Inf	0.280894	1
-	hsacirc_002086	5.33333	10.6667	0	0	-Inf	0.280894	1
-	hsacirc_018805	5.33333	10.6667	0	0	-Inf	0.280894	1
hsa_circ_0003945	hsacirc_008599	5.33333	10.6667	0	0	-Inf	0.280894	1
hsa_circ_0006971	hsacirc_006989	5.33333	10.6667	0	0	-Inf	0.280894	1
hsa_circ_0005518	hsacirc_009689	5.33333	10.6667	0	0	-Inf	0.280894	1
hsa_circ_0089974	hsacirc_007702	14.9167	25.3333	4.5	0.177632	-2.49304	0.281639	1
hsa_circ_0008194	hsacirc_005634	8.75	16	1.5	0.09375	-3.41504	0.281853	1
hsa_circ_0025768	hsacirc_001060	8.75	16	1.5	0.09375	-3.41504	0.281853	1
hsa_circ_0001307	hsacirc_018455	8.75	16	1.5	0.09375	-3.41504	0.281853	1
hsa_circ_0004973	hsacirc_017085	8.75	16	1.5	0.09375	-3.41504	0.281853	1
hsa_circ_0008619	hsacirc_018151	8.75	16	1.5	0.09375	-3.41504	0.281853	1
hsa_circ_0007303	hsacirc_002146	8.5	2	15	7.5	2.90689	0.28444	1
hsa_circ_0003922	hsacirc_003914	8.5	2	15	7.5	2.90689	0.28444	1
-	hsacirc_012468	8.5	2	15	7.5	2.90689	0.28444	1
hsa_circ_0001355	hsacirc_016307	119.167	193.333	45	0.232759	-2.10309	0.28636	1
hsa_circ_0005199	hsacirc_011145	24.1667	39.3333	9	0.228814	-2.12776	0.290675	1
hsa_circ_0000655	hsacirc_002067	11.5	20	3	0.15	-2.73697	0.292101	1
hsa_circ_0002947	hsacirc_003377	11.5	20	3	0.15	-2.73697	0.292101	1
hsa_circ_0000448	hsacirc_012415	37.5	60	15	0.25	-2	0.295316	1
hsa_circ_0002394	hsacirc_009953	13.5833	4.66667	22.5	4.82143	2.26946	0.295401	1
-	hsacirc_019190	13.5833	4.66667	22.5	4.82143	2.26946	0.295401	1
hsa_circ_0007655	hsacirc_005809	38	16	60	3.75	1.90689	0.295464	1
-	hsacirc_016604	17.5833	6.66667	28.5	4.275	2.09592	0.298043	1
hsa_circ_0013252	hsacirc_001794	9.58333	2.66667	16.5	6.1875	2.62936	0.298215	1
hsa_circ_0005332	hsacirc_011627	40.5833	64.6667	16.5	0.255155	-1.97056	0.299879	1
hsa_circ_0007363	hsacirc_008918	3	0	6	Inf	Inf	0.300267	1
-	hsacirc_000618	3	0	6	Inf	Inf	0.300267	1
-	hsacirc_013417	3	0	6	Inf	Inf	0.300267	1
-	hsacirc_011504	3	0	6	Inf	Inf	0.300267	1
hsa_circ_0016531	hsacirc_018003	3	0	6	Inf	Inf	0.300267	1
-	hsacirc_016895	3	0	6	Inf	Inf	0.300267	1
-	hsacirc_017154	3	0	6	Inf	Inf	0.300267	1
-	hsacirc_003480	3	0	6	Inf	Inf	0.300267	1
-	hsacirc_009377	3	0	6	Inf	Inf	0.300267	1
-	hsacirc_013108	3	0	6	Inf	Inf	0.300267	1
-	hsacirc_010960	3	0	6	Inf	Inf	0.300267	1
-	hsacirc_017908	3	0	6	Inf	Inf	0.300267	1
-	hsacirc_001458	3	0	6	Inf	Inf	0.300267	1
-	hsacirc_014301	3	0	6	Inf	Inf	0.300267	1
hsa_circ_0000279	hsacirc_002277	3	0	6	Inf	Inf	0.300267	1
-	hsacirc_001682	3	0	6	Inf	Inf	0.300267	1
-	hsacirc_012824	3	0	6	Inf	Inf	0.300267	1
hsa_circ_0029898	hsacirc_020038	3	0	6	Inf	Inf	0.300267	1
-	hsacirc_003834	3	0	6	Inf	Inf	0.300267	1
hsa_circ_0008636	hsacirc_005268	3	0	6	Inf	Inf	0.300267	1
hsa_circ_0039929	hsacirc_008348	3	0	6	Inf	Inf	0.300267	1
-	hsacirc_009096	3	0	6	Inf	Inf	0.300267	1
-	hsacirc_019958	3	0	6	Inf	Inf	0.300267	1
-	hsacirc_002985	3	0	6	Inf	Inf	0.300267	1
-	hsacirc_013019	3	0	6	Inf	Inf	0.300267	1
hsa_circ_0008083	hsacirc_016090	3	0	6	Inf	Inf	0.300267	1
-	hsacirc_009043	3	0	6	Inf	Inf	0.300267	1
hsa_circ_0053045	hsacirc_007974	3	0	6	Inf	Inf	0.300267	1
-	hsacirc_020002	3	0	6	Inf	Inf	0.300267	1
-	hsacirc_020259	3	0	6	Inf	Inf	0.300267	1
-	hsacirc_019250	3	0	6	Inf	Inf	0.300267	1
-	hsacirc_012821	3	0	6	Inf	Inf	0.300267	1
-	hsacirc_019992	3	0	6	Inf	Inf	0.300267	1
hsa_circ_0064785	hsacirc_013009	3	0	6	Inf	Inf	0.300267	1
-	hsacirc_017884	3	0	6	Inf	Inf	0.300267	1
-	hsacirc_020156	3	0	6	Inf	Inf	0.300267	1
-	hsacirc_006016	3	0	6	Inf	Inf	0.300267	1
-	hsacirc_019366	3	0	6	Inf	Inf	0.300267	1
-	hsacirc_005572	3	0	6	Inf	Inf	0.300267	1
-	hsacirc_008207	3	0	6	Inf	Inf	0.300267	1
-	hsacirc_012926	3	0	6	Inf	Inf	0.300267	1
-	hsacirc_017864	3	0	6	Inf	Inf	0.300267	1
-	hsacirc_006262	3	0	6	Inf	Inf	0.300267	1
-	hsacirc_009068	3	0	6	Inf	Inf	0.300267	1
-	hsacirc_000503	3	0	6	Inf	Inf	0.300267	1
-	hsacirc_012900	3	0	6	Inf	Inf	0.300267	1
-	hsacirc_009573	3	0	6	Inf	Inf	0.300267	1
-	hsacirc_005955	3	0	6	Inf	Inf	0.300267	1
hsa_circ_0078617	hsacirc_011787	3	0	6	Inf	Inf	0.300267	1
-	hsacirc_005309	3	0	6	Inf	Inf	0.300267	1
-	hsacirc_006384	3	0	6	Inf	Inf	0.300267	1
hsa_circ_0077293	hsacirc_011961	3	0	6	Inf	Inf	0.300267	1
-	hsacirc_003941	3	0	6	Inf	Inf	0.300267	1
-	hsacirc_008638	3	0	6	Inf	Inf	0.300267	1
-	hsacirc_008103	3	0	6	Inf	Inf	0.300267	1
hsa_circ_0008336	hsacirc_015277	3	0	6	Inf	Inf	0.300267	1
hsa_circ_0079947	hsacirc_008320	3	0	6	Inf	Inf	0.300267	1
-	hsacirc_004823	3	0	6	Inf	Inf	0.300267	1
hsa_circ_0085292	hsacirc_008344	3	0	6	Inf	Inf	0.300267	1
hsa_circ_0085496	hsacirc_004927	3	0	6	Inf	Inf	0.300267	1
-	hsacirc_013848	3	0	6	Inf	Inf	0.300267	1
-	hsacirc_011346	3	0	6	Inf	Inf	0.300267	1
hsa_circ_0007209	hsacirc_005715	3	0	6	Inf	Inf	0.300267	1
hsa_circ_0088227	hsacirc_009104	3	0	6	Inf	Inf	0.300267	1
-	hsacirc_007937	3	0	6	Inf	Inf	0.300267	1
hsa_circ_0008599	hsacirc_007565	3	0	6	Inf	Inf	0.300267	1
-	hsacirc_020237	3	0	6	Inf	Inf	0.300267	1
-	hsacirc_010705	3	0	6	Inf	Inf	0.300267	1
-	hsacirc_015945	3	0	6	Inf	Inf	0.300267	1
hsa_circ_0009246	hsacirc_003054	5	10	0	0	-Inf	0.302187	1
hsa_circ_0000034	hsacirc_016880	5	10	0	0	-Inf	0.302187	1
hsa_circ_0013167	hsacirc_010634	5	10	0	0	-Inf	0.302187	1
hsa_circ_0000206	hsacirc_006754	5	10	0	0	-Inf	0.302187	1
-	hsacirc_017852	5	10	0	0	-Inf	0.302187	1
hsa_circ_0023448	hsacirc_010259	5	10	0	0	-Inf	0.302187	1
hsa_circ_0003307	hsacirc_003200	5	10	0	0	-Inf	0.302187	1
-	hsacirc_019627	5	10	0	0	-Inf	0.302187	1
hsa_circ_0002783	hsacirc_012199	5	10	0	0	-Inf	0.302187	1
hsa_circ_0025765	hsacirc_011893	5	10	0	0	-Inf	0.302187	1
hsa_circ_0006189	hsacirc_019458	5	10	0	0	-Inf	0.302187	1
hsa_circ_0000402	hsacirc_003356	5	10	0	0	-Inf	0.302187	1
hsa_circ_0007127	hsacirc_016455	5	10	0	0	-Inf	0.302187	1
hsa_circ_0006525	hsacirc_013313	5	10	0	0	-Inf	0.302187	1
hsa_circ_0003166	hsacirc_000948	5	10	0	0	-Inf	0.302187	1
hsa_circ_0000646	hsacirc_010975	5	10	0	0	-Inf	0.302187	1
hsa_circ_0005946	hsacirc_008253	5	10	0	0	-Inf	0.302187	1
hsa_circ_0007542	hsacirc_007480	5	10	0	0	-Inf	0.302187	1
hsa_circ_0007955	hsacirc_018583	5	10	0	0	-Inf	0.302187	1
hsa_circ_0067480	hsacirc_009625	5	10	0	0	-Inf	0.302187	1
hsa_circ_0007149	hsacirc_019699	5	10	0	0	-Inf	0.302187	1
hsa_circ_0006358	hsacirc_011838	5	10	0	0	-Inf	0.302187	1
hsa_circ_0073177	hsacirc_008362	5	10	0	0	-Inf	0.302187	1
hsa_circ_0081964	hsacirc_011683	5	10	0	0	-Inf	0.302187	1
-	hsacirc_006745	5	10	0	0	-Inf	0.302187	1
hsa_circ_0005013	hsacirc_014755	5	10	0	0	-Inf	0.302187	1
hsa_circ_0008812	hsacirc_015561	5	10	0	0	-Inf	0.302187	1
hsa_circ_0002672	hsacirc_018131	5	10	0	0	-Inf	0.302187	1
-	hsacirc_018408	5	10	0	0	-Inf	0.302187	1
hsa_circ_0005062	hsacirc_016752	5	10	0	0	-Inf	0.302187	1
hsa_circ_0000091	hsacirc_007309	14.6667	5.33333	24	4.5	2.16993	0.304949	1
hsa_circ_0001727	hsacirc_012365	57.6667	91.3333	24	0.262774	-1.92811	0.305209	1
hsa_circ_0006892	hsacirc_018069	11.1667	19.3333	3	0.155172	-2.68806	0.3067	1
hsa_circ_0001417	hsacirc_013927	29.5833	12.6667	46.5	3.67105	1.87619	0.309631	1
hsa_circ_0000233	hsacirc_015354	6.66667	1.33333	12	9	3.16993	0.310363	1
hsa_circ_0025513	hsacirc_018341	6.66667	1.33333	12	9	3.16993	0.310363	1
-	hsacirc_012075	6.66667	1.33333	12	9	3.16993	0.310363	1
-	hsacirc_015602	6.66667	1.33333	12	9	3.16993	0.310363	1
hsa_circ_0042880	hsacirc_009783	6.66667	1.33333	12	9	3.16993	0.310363	1
-	hsacirc_012550	6.66667	1.33333	12	9	3.16993	0.310363	1
hsa_circ_0008505	hsacirc_003915	6.66667	1.33333	12	9	3.16993	0.310363	1
hsa_circ_0008537	hsacirc_001948	6.66667	1.33333	12	9	3.16993	0.310363	1
hsa_circ_0079227	hsacirc_000407	6.66667	1.33333	12	9	3.16993	0.310363	1
-	hsacirc_012228	6.66667	1.33333	12	9	3.16993	0.310363	1
hsa_circ_0000907	hsacirc_018800	20.0833	32.6667	7.5	0.229592	-2.12286	0.311094	1
hsa_circ_0008071	hsacirc_003067	15.75	6	25.5	4.25	2.08746	0.313298	1
hsa_circ_0001615	hsacirc_013320	29.3333	46.6667	12	0.257143	-1.95936	0.315496	1
hsa_circ_0005253	hsacirc_009071	8.08333	14.6667	1.5	0.102273	-3.28951	0.318861	1
hsa_circ_0001944	hsacirc_011655	81.25	128	34.5	0.269531	-1.89148	0.319285	1
hsa_circ_0008951	hsacirc_014819	24.8333	10.6667	39	3.65625	1.87036	0.319679	1
hsa_circ_0018054	hsacirc_010245	10.8333	18.6667	3	0.160714	-2.63743	0.322362	1
hsa_circ_0001050	hsacirc_010629	10.8333	18.6667	3	0.160714	-2.63743	0.322362	1
hsa_circ_0072688	hsacirc_013300	10.8333	18.6667	3	0.160714	-2.63743	0.322362	1
-	hsacirc_017120	10.8333	18.6667	3	0.160714	-2.63743	0.322362	1
hsa_circ_0000638	hsacirc_014254	16.6667	27.3333	6	0.219512	-2.18763	0.322545	1
hsa_circ_0000098	hsacirc_006111	4.66667	9.33333	0	0	-Inf	0.324023	1
hsa_circ_0008161	hsacirc_018763	4.66667	9.33333	0	0	-Inf	0.324023	1
-	hsacirc_004384	4.66667	9.33333	0	0	-Inf	0.324023	1
hsa_circ_0006628	hsacirc_008171	4.66667	9.33333	0	0	-Inf	0.324023	1
hsa_circ_0006276	hsacirc_018096	4.66667	9.33333	0	0	-Inf	0.324023	1
hsa_circ_0007484	hsacirc_019493	4.66667	9.33333	0	0	-Inf	0.324023	1
hsa_circ_0021644	hsacirc_002830	4.66667	9.33333	0	0	-Inf	0.324023	1
-	hsacirc_013816	4.66667	9.33333	0	0	-Inf	0.324023	1
hsa_circ_0006903	hsacirc_014307	4.66667	9.33333	0	0	-Inf	0.324023	1
hsa_circ_0003285	hsacirc_015353	4.66667	9.33333	0	0	-Inf	0.324023	1
hsa_circ_0035188	hsacirc_012034	4.66667	9.33333	0	0	-Inf	0.324023	1
hsa_circ_0006601	hsacirc_013654	4.66667	9.33333	0	0	-Inf	0.324023	1
hsa_circ_0039076	hsacirc_006588	4.66667	9.33333	0	0	-Inf	0.324023	1
hsa_circ_0040487	hsacirc_000675	4.66667	9.33333	0	0	-Inf	0.324023	1
hsa_circ_0004805	hsacirc_013124	4.66667	9.33333	0	0	-Inf	0.324023	1
-	hsacirc_017428	4.66667	9.33333	0	0	-Inf	0.324023	1
hsa_circ_0046729	hsacirc_010341	4.66667	9.33333	0	0	-Inf	0.324023	1
hsa_circ_0050256	hsacirc_018125	4.66667	9.33333	0	0	-Inf	0.324023	1
hsa_circ_0004956	hsacirc_001640	4.66667	9.33333	0	0	-Inf	0.324023	1
hsa_circ_0058806	hsacirc_000695	4.66667	9.33333	0	0	-Inf	0.324023	1
hsa_circ_0058919	hsacirc_003851	4.66667	9.33333	0	0	-Inf	0.324023	1
hsa_circ_0060193	hsacirc_011384	4.66667	9.33333	0	0	-Inf	0.324023	1
hsa_circ_0001202	hsacirc_005262	4.66667	9.33333	0	0	-Inf	0.324023	1
hsa_circ_0008343	hsacirc_014031	4.66667	9.33333	0	0	-Inf	0.324023	1
hsa_circ_0001403	hsacirc_015613	4.66667	9.33333	0	0	-Inf	0.324023	1
hsa_circ_0005991	hsacirc_009598	4.66667	9.33333	0	0	-Inf	0.324023	1
hsa_circ_0003716	hsacirc_005994	4.66667	9.33333	0	0	-Inf	0.324023	1
hsa_circ_0074069	hsacirc_007008	4.66667	9.33333	0	0	-Inf	0.324023	1
hsa_circ_0005714	hsacirc_004275	4.66667	9.33333	0	0	-Inf	0.324023	1
-	hsacirc_007136	4.66667	9.33333	0	0	-Inf	0.324023	1
hsa_circ_0007239	hsacirc_015692	4.66667	9.33333	0	0	-Inf	0.324023	1
-	hsacirc_008421	4.66667	9.33333	0	0	-Inf	0.324023	1
hsa_circ_0005927	hsacirc_010132	4.66667	9.33333	0	0	-Inf	0.324023	1
hsa_circ_0007933	hsacirc_010866	4.66667	9.33333	0	0	-Inf	0.324023	1
hsa_circ_0001821	hsacirc_005942	28.6667	45.3333	12	0.264706	-1.91754	0.326987	1
hsa_circ_0006412	hsacirc_002389	4.83333	0.666667	9	13.5	3.75489	0.329284	1
hsa_circ_0005806	hsacirc_015399	4.83333	0.666667	9	13.5	3.75489	0.329284	1
-	hsacirc_003646	4.83333	0.666667	9	13.5	3.75489	0.329284	1
-	hsacirc_011720	4.83333	0.666667	9	13.5	3.75489	0.329284	1
hsa_circ_0001801	hsacirc_002706	73.6667	33.3333	114	3.42	1.774	0.330244	1
hsa_circ_0000607	hsacirc_007148	49.5833	22.6667	76.5	3.375	1.75489	0.330766	1
-	hsacirc_003177	7.75	2	13.5	6.75	2.75489	0.33078	1
-	hsacirc_010927	7.75	2	13.5	6.75	2.75489	0.33078	1
hsa_circ_0006395	hsacirc_014295	13.9167	5.33333	22.5	4.21875	2.07682	0.332595	1
hsa_circ_0003489	hsacirc_009640	13.9167	5.33333	22.5	4.21875	2.07682	0.332595	1
-	hsacirc_016512	37.9167	59.3333	16.5	0.27809	-1.84638	0.332935	1
hsa_circ_0037096	hsacirc_010328	16.3333	26.6667	6	0.225	-2.152	0.333157	1
hsa_circ_0003449	hsacirc_011964	16.3333	26.6667	6	0.225	-2.152	0.333157	1
hsa_circ_0003218	hsacirc_004942	19.0833	30.6667	7.5	0.244565	-2.03171	0.337904	1
hsa_circ_0004870	hsacirc_007509	10.5	18	3	0.166667	-2.58496	0.339121	1
hsa_circ_0001095	hsacirc_008374	7.75	14	1.5	0.107143	-3.22239	0.339389	1
hsa_circ_0000614	hsacirc_000603	15	6	24	4	2	0.339583	1
hsa_circ_0019611	hsacirc_001931	8.83333	2.66667	15	5.625	2.49185	0.341891	1
hsa_circ_0028090	hsacirc_012119	8.83333	2.66667	15	5.625	2.49185	0.341891	1
hsa_circ_0008967	hsacirc_003765	16	26	6	0.230769	-2.11548	0.344249	1
hsa_circ_0013353	hsacirc_016994	4.33333	8.66667	0	0	-Inf	0.346852	1
hsa_circ_0003693	hsacirc_016524	4.33333	8.66667	0	0	-Inf	0.346852	1
hsa_circ_0016414	hsacirc_019370	4.33333	8.66667	0	0	-Inf	0.346852	1
hsa_circ_0000196	hsacirc_007640	4.33333	8.66667	0	0	-Inf	0.346852	1
hsa_circ_0011168	hsacirc_000801	4.33333	8.66667	0	0	-Inf	0.346852	1
hsa_circ_0006820	hsacirc_000820	4.33333	8.66667	0	0	-Inf	0.346852	1
hsa_circ_0002071	hsacirc_001178	4.33333	8.66667	0	0	-Inf	0.346852	1
hsa_circ_0025619	hsacirc_005316	4.33333	8.66667	0	0	-Inf	0.346852	1
hsa_circ_0009035	hsacirc_018079	4.33333	8.66667	0	0	-Inf	0.346852	1
-	hsacirc_014358	4.33333	8.66667	0	0	-Inf	0.346852	1
hsa_circ_0005035	hsacirc_003752	4.33333	8.66667	0	0	-Inf	0.346852	1
hsa_circ_0008498	hsacirc_005186	4.33333	8.66667	0	0	-Inf	0.346852	1
hsa_circ_0040929	hsacirc_003525	4.33333	8.66667	0	0	-Inf	0.346852	1
hsa_circ_0005600	hsacirc_009285	4.33333	8.66667	0	0	-Inf	0.346852	1
hsa_circ_0045431	hsacirc_018194	4.33333	8.66667	0	0	-Inf	0.346852	1
hsa_circ_0045847	hsacirc_014951	4.33333	8.66667	0	0	-Inf	0.346852	1
hsa_circ_0047721	hsacirc_001223	4.33333	8.66667	0	0	-Inf	0.346852	1
hsa_circ_0002579	hsacirc_000475	4.33333	8.66667	0	0	-Inf	0.346852	1
hsa_circ_0049398	hsacirc_012986	4.33333	8.66667	0	0	-Inf	0.346852	1
hsa_circ_0002607	hsacirc_016231	4.33333	8.66667	0	0	-Inf	0.346852	1
hsa_circ_0061086	hsacirc_008620	4.33333	8.66667	0	0	-Inf	0.346852	1
hsa_circ_0005076	hsacirc_016473	4.33333	8.66667	0	0	-Inf	0.346852	1
hsa_circ_0001200	hsacirc_018640	4.33333	8.66667	0	0	-Inf	0.346852	1
hsa_circ_0001206	hsacirc_018867	4.33333	8.66667	0	0	-Inf	0.346852	1
-	hsacirc_003728	4.33333	8.66667	0	0	-Inf	0.346852	1
hsa_circ_0001290	hsacirc_001284	4.33333	8.66667	0	0	-Inf	0.346852	1
hsa_circ_0008465	hsacirc_019410	4.33333	8.66667	0	0	-Inf	0.346852	1
hsa_circ_0075346	hsacirc_008511	4.33333	8.66667	0	0	-Inf	0.346852	1
hsa_circ_0072161	hsacirc_000270	4.33333	8.66667	0	0	-Inf	0.346852	1
hsa_circ_0006920	hsacirc_016159	4.33333	8.66667	0	0	-Inf	0.346852	1
-	hsacirc_009334	4.33333	8.66667	0	0	-Inf	0.346852	1
hsa_circ_0002094	hsacirc_011633	4.33333	8.66667	0	0	-Inf	0.346852	1
hsa_circ_0003575	hsacirc_009936	4.33333	8.66667	0	0	-Inf	0.346852	1
-	hsacirc_010303	4.33333	8.66667	0	0	-Inf	0.346852	1
hsa_circ_0006383	hsacirc_002877	4.33333	8.66667	0	0	-Inf	0.346852	1
hsa_circ_0087391	hsacirc_001827	4.33333	8.66667	0	0	-Inf	0.346852	1
hsa_circ_0003972	hsacirc_003052	4.33333	8.66667	0	0	-Inf	0.346852	1
-	hsacirc_006601	4.33333	8.66667	0	0	-Inf	0.346852	1
hsa_circ_0007817	hsacirc_017622	24.5833	38.6667	10.5	0.271552	-1.8807	0.347172	1
hsa_circ_0007052	hsacirc_018031	39.6667	61.3333	18	0.293478	-1.76867	0.352164	1
hsa_circ_0001400	hsacirc_002356	12.9167	21.3333	4.5	0.210938	-2.24511	0.353857	1
-	hsacirc_012351	219.917	87.3333	352.5	4.03626	2.01302	0.355368	1
hsa_circ_0005263	hsacirc_009496	15.6667	25.3333	6	0.236842	-2.078	0.355847	1
hsa_circ_0005571	hsacirc_000559	15.6667	25.3333	6	0.236842	-2.078	0.355847	1
hsa_circ_0001882	hsacirc_008228	15.6667	25.3333	6	0.236842	-2.078	0.355847	1
hsa_circ_0006157	hsacirc_009305	10.1667	17.3333	3	0.173077	-2.53051	0.357003	1
hsa_circ_0003131	hsacirc_005509	10.1667	17.3333	3	0.173077	-2.53051	0.357003	1
hsa_circ_0009057	hsacirc_006964	7.41667	13.3333	1.5	0.1125	-3.152	0.361225	1
hsa_circ_0001349	hsacirc_010301	7.41667	13.3333	1.5	0.1125	-3.152	0.361225	1
hsa_circ_0008618	hsacirc_008700	7.41667	13.3333	1.5	0.1125	-3.152	0.361225	1
hsa_circ_0008518	hsacirc_014636	7.41667	13.3333	1.5	0.1125	-3.152	0.361225	1
hsa_circ_0002028	hsacirc_002104	5.91667	1.33333	10.5	7.875	2.97728	0.367745	1
-	hsacirc_015660	5.91667	1.33333	10.5	7.875	2.97728	0.367745	1
hsa_circ_0006509	hsacirc_012587	5.91667	1.33333	10.5	7.875	2.97728	0.367745	1
hsa_circ_0009052	hsacirc_007936	5.91667	1.33333	10.5	7.875	2.97728	0.367745	1
hsa_circ_0003697	hsacirc_001928	12.5833	20.6667	4.5	0.217742	-2.19931	0.368254	1
hsa_circ_0020134	hsacirc_002834	23.5833	36.6667	10.5	0.286364	-1.80408	0.370673	1
hsa_circ_0003926	hsacirc_010377	4	8	0	0	-Inf	0.371575	1
hsa_circ_0000142	hsacirc_002581	4	8	0	0	-Inf	0.371575	1
hsa_circ_0003567	hsacirc_001891	4	8	0	0	-Inf	0.371575	1
hsa_circ_0000166	hsacirc_010447	4	8	0	0	-Inf	0.371575	1
hsa_circ_0015980	hsacirc_013442	4	8	0	0	-Inf	0.371575	1
hsa_circ_0016485	hsacirc_003564	4	8	0	0	-Inf	0.371575	1
hsa_circ_0000199	hsacirc_003885	4	8	0	0	-Inf	0.371575	1
hsa_circ_0012782	hsacirc_005741	4	8	0	0	-Inf	0.371575	1
-	hsacirc_012422	4	8	0	0	-Inf	0.371575	1
hsa_circ_0019566	hsacirc_019365	4	8	0	0	-Inf	0.371575	1
hsa_circ_0000264	hsacirc_012140	4	8	0	0	-Inf	0.371575	1
hsa_circ_0017359	hsacirc_011286	4	8	0	0	-Inf	0.371575	1
hsa_circ_0003379	hsacirc_007497	4	8	0	0	-Inf	0.371575	1
-	hsacirc_014514	4	8	0	0	-Inf	0.371575	1
hsa_circ_0000344	hsacirc_011217	4	8	0	0	-Inf	0.371575	1
hsa_circ_0003855	hsacirc_006449	4	8	0	0	-Inf	0.371575	1
hsa_circ_0007332	hsacirc_008807	4	8	0	0	-Inf	0.371575	1
hsa_circ_0002120	hsacirc_002083	4	8	0	0	-Inf	0.371575	1
-	hsacirc_013347	4	8	0	0	-Inf	0.371575	1
hsa_circ_0037104	hsacirc_007780	4	8	0	0	-Inf	0.371575	1
hsa_circ_0008153	hsacirc_011703	4	8	0	0	-Inf	0.371575	1
hsa_circ_0006979	hsacirc_018795	4	8	0	0	-Inf	0.371575	1
hsa_circ_0008558	hsacirc_018957	4	8	0	0	-Inf	0.371575	1
hsa_circ_0006482	hsacirc_004647	4	8	0	0	-Inf	0.371575	1
hsa_circ_0007669	hsacirc_010079	4	8	0	0	-Inf	0.371575	1
hsa_circ_0003438	hsacirc_005842	4	8	0	0	-Inf	0.371575	1
-	hsacirc_017100	4	8	0	0	-Inf	0.371575	1
hsa_circ_0000749	hsacirc_001593	4	8	0	0	-Inf	0.371575	1
hsa_circ_0045202	hsacirc_012250	4	8	0	0	-Inf	0.371575	1
hsa_circ_0047398	hsacirc_012065	4	8	0	0	-Inf	0.371575	1
hsa_circ_0047769	hsacirc_008540	4	8	0	0	-Inf	0.371575	1
hsa_circ_0047880	hsacirc_012564	4	8	0	0	-Inf	0.371575	1
-	hsacirc_011696	4	8	0	0	-Inf	0.371575	1
hsa_circ_0003146	hsacirc_006311	4	8	0	0	-Inf	0.371575	1
hsa_circ_0052012	hsacirc_000721	4	8	0	0	-Inf	0.371575	1
hsa_circ_0005520	hsacirc_014618	4	8	0	0	-Inf	0.371575	1
hsa_circ_0056439	hsacirc_001563	4	8	0	0	-Inf	0.371575	1
hsa_circ_0060461	hsacirc_009217	4	8	0	0	-Inf	0.371575	1
hsa_circ_0061052	hsacirc_018163	4	8	0	0	-Inf	0.371575	1
hsa_circ_0061179	hsacirc_004364	4	8	0	0	-Inf	0.371575	1
-	hsacirc_014270	4	8	0	0	-Inf	0.371575	1
hsa_circ_0007986	hsacirc_004877	4	8	0	0	-Inf	0.371575	1
hsa_circ_0007524	hsacirc_013053	4	8	0	0	-Inf	0.371575	1
hsa_circ_0067163	hsacirc_013269	4	8	0	0	-Inf	0.371575	1
hsa_circ_0064871	hsacirc_000073	4	8	0	0	-Inf	0.371575	1
hsa_circ_0071519	hsacirc_000684	4	8	0	0	-Inf	0.371575	1
hsa_circ_0006977	hsacirc_000354	4	8	0	0	-Inf	0.371575	1
hsa_circ_0072107	hsacirc_000090	4	8	0	0	-Inf	0.371575	1
-	hsacirc_018097	4	8	0	0	-Inf	0.371575	1
hsa_circ_0007915	hsacirc_002704	4	8	0	0	-Inf	0.371575	1
hsa_circ_0071681	hsacirc_014018	4	8	0	0	-Inf	0.371575	1
hsa_circ_0076347	hsacirc_001428	4	8	0	0	-Inf	0.371575	1
-	hsacirc_001591	4	8	0	0	-Inf	0.371575	1
hsa_circ_0001766	hsacirc_001657	4	8	0	0	-Inf	0.371575	1
-	hsacirc_012486	4	8	0	0	-Inf	0.371575	1
-	hsacirc_000670	4	8	0	0	-Inf	0.371575	1
hsa_circ_0001781	hsacirc_011357	4	8	0	0	-Inf	0.371575	1
hsa_circ_0005249	hsacirc_019216	4	8	0	0	-Inf	0.371575	1
hsa_circ_0009134	hsacirc_008551	4	8	0	0	-Inf	0.371575	1
hsa_circ_0006515	hsacirc_007083	4	8	0	0	-Inf	0.371575	1
hsa_circ_0001862	hsacirc_014268	4	8	0	0	-Inf	0.371575	1
hsa_circ_0004189	hsacirc_020180	4	8	0	0	-Inf	0.371575	1
hsa_circ_0087248	hsacirc_016499	4	8	0	0	-Inf	0.371575	1
hsa_circ_0002643	hsacirc_004505	4	8	0	0	-Inf	0.371575	1
-	hsacirc_000819	4	8	0	0	-Inf	0.371575	1
hsa_circ_0092142	hsacirc_004659	4	8	0	0	-Inf	0.371575	1
hsa_circ_0004960	hsacirc_005739	22.5833	10.6667	34.5	3.23438	1.69349	0.372747	1
hsa_circ_0000120	hsacirc_003792	9.83333	16.6667	3	0.18	-2.47393	0.376017	1
hsa_circ_0083234	hsacirc_011639	9.83333	16.6667	3	0.18	-2.47393	0.376017	1
hsa_circ_0005395	hsacirc_000580	16.4167	7.33333	25.5	3.47727	1.79796	0.377528	1
hsa_circ_0007096	hsacirc_018682	16.4167	7.33333	25.5	3.47727	1.79796	0.377528	1
hsa_circ_0000437	hsacirc_019592	108.833	166.667	51	0.306	-1.7084	0.380567	1
hsa_circ_0000880	hsacirc_012027	12.25	20	4.5	0.225	-2.152	0.383584	1
hsa_circ_0000251	hsacirc_019686	7.08333	12.6667	1.5	0.118421	-3.078	0.384161	1
hsa_circ_0004417	hsacirc_019896	7	2	12	6	2.58496	0.384467	1
-	hsacirc_010261	7	2	12	6	2.58496	0.384467	1
hsa_circ_0001617	hsacirc_012855	7	2	12	6	2.58496	0.384467	1
hsa_circ_0001361	hsacirc_011360	20.1667	31.3333	9	0.287234	-1.7997	0.388335	1
hsa_circ_0003421	hsacirc_017217	17.4167	27.3333	7.5	0.27439	-1.8657	0.390409	1
hsa_circ_0005689	hsacirc_001876	4.08333	0.666667	7.5	11.25	3.49185	0.391448	1
hsa_circ_0008975	hsacirc_002180	4.08333	0.666667	7.5	11.25	3.49185	0.391448	1
-	hsacirc_018557	4.08333	0.666667	7.5	11.25	3.49185	0.391448	1
hsa_circ_0008706	hsacirc_011351	4.08333	0.666667	7.5	11.25	3.49185	0.391448	1
-	hsacirc_017163	4.08333	0.666667	7.5	11.25	3.49185	0.391448	1
-	hsacirc_007589	4.08333	0.666667	7.5	11.25	3.49185	0.391448	1
hsa_circ_0002995	hsacirc_001081	4.08333	0.666667	7.5	11.25	3.49185	0.391448	1
hsa_circ_0090857	hsacirc_001867	4.08333	0.666667	7.5	11.25	3.49185	0.391448	1
hsa_circ_0005268	hsacirc_015099	8.08333	2.66667	13.5	5.0625	2.33985	0.392313	1
hsa_circ_0001112	hsacirc_008110	21.8333	10.6667	33	3.09375	1.62936	0.393433	1
hsa_circ_0004996	hsacirc_007043	9.16667	3.33333	15	4.5	2.16993	0.395507	1
hsa_circ_0003057	hsacirc_011443	9.16667	3.33333	15	4.5	2.16993	0.395507	1
hsa_circ_0004622	hsacirc_013954	9.5	16	3	0.1875	-2.41504	0.39616	1
hsa_circ_0056247	hsacirc_013951	9.5	16	3	0.1875	-2.41504	0.39616	1
hsa_circ_0006141	hsacirc_018944	9.5	16	3	0.1875	-2.41504	0.39616	1
hsa_circ_0007586	hsacirc_007482	25.3333	38.6667	12	0.310345	-1.68806	0.396257	1
-	hsacirc_002421	10.25	4	16.5	4.125	2.04439	0.396357	1
hsa_circ_0040188	hsacirc_020346	10.25	4	16.5	4.125	2.04439	0.396357	1
hsa_circ_0002605	hsacirc_006620	11.3333	4.66667	18	3.85714	1.94753	0.396952	1
hsa_circ_0014088	hsacirc_018716	3.66667	7.33333	0	0	-Inf	0.399736	1
-	hsacirc_017374	3.66667	7.33333	0	0	-Inf	0.399736	1
hsa_circ_0002231	hsacirc_009219	3.66667	7.33333	0	0	-Inf	0.399736	1
hsa_circ_0019869	hsacirc_008481	3.66667	7.33333	0	0	-Inf	0.399736	1
hsa_circ_0018400	hsacirc_005449	3.66667	7.33333	0	0	-Inf	0.399736	1
hsa_circ_0018761	hsacirc_015631	3.66667	7.33333	0	0	-Inf	0.399736	1
hsa_circ_0006649	hsacirc_008054	3.66667	7.33333	0	0	-Inf	0.399736	1
hsa_circ_0007168	hsacirc_006347	3.66667	7.33333	0	0	-Inf	0.399736	1
hsa_circ_0005861	hsacirc_010302	3.66667	7.33333	0	0	-Inf	0.399736	1
hsa_circ_0004291	hsacirc_016523	3.66667	7.33333	0	0	-Inf	0.399736	1
hsa_circ_0023182	hsacirc_019532	3.66667	7.33333	0	0	-Inf	0.399736	1
hsa_circ_0023224	hsacirc_005567	3.66667	7.33333	0	0	-Inf	0.399736	1
-	hsacirc_013276	3.66667	7.33333	0	0	-Inf	0.399736	1
hsa_circ_0035949	hsacirc_011928	3.66667	7.33333	0	0	-Inf	0.399736	1
hsa_circ_0000633	hsacirc_008308	3.66667	7.33333	0	0	-Inf	0.399736	1
hsa_circ_0006434	hsacirc_010871	3.66667	7.33333	0	0	-Inf	0.399736	1
hsa_circ_0002599	hsacirc_006281	3.66667	7.33333	0	0	-Inf	0.399736	1
-	hsacirc_015848	3.66667	7.33333	0	0	-Inf	0.399736	1
-	hsacirc_017329	3.66667	7.33333	0	0	-Inf	0.399736	1
hsa_circ_0046092	hsacirc_017814	3.66667	7.33333	0	0	-Inf	0.399736	1
-	hsacirc_012930	3.66667	7.33333	0	0	-Inf	0.399736	1
-	hsacirc_013400	3.66667	7.33333	0	0	-Inf	0.399736	1
-	hsacirc_017392	3.66667	7.33333	0	0	-Inf	0.399736	1
hsa_circ_0060150	hsacirc_012341	3.66667	7.33333	0	0	-Inf	0.399736	1
hsa_circ_0063697	hsacirc_012826	3.66667	7.33333	0	0	-Inf	0.399736	1
hsa_circ_0005881	hsacirc_020275	3.66667	7.33333	0	0	-Inf	0.399736	1
hsa_circ_0008453	hsacirc_011158	3.66667	7.33333	0	0	-Inf	0.399736	1
hsa_circ_0001472	hsacirc_007110	3.66667	7.33333	0	0	-Inf	0.399736	1
hsa_circ_0072568	hsacirc_018466	3.66667	7.33333	0	0	-Inf	0.399736	1
-	hsacirc_015808	3.66667	7.33333	0	0	-Inf	0.399736	1
hsa_circ_0077958	hsacirc_017282	3.66667	7.33333	0	0	-Inf	0.399736	1
-	hsacirc_018852	3.66667	7.33333	0	0	-Inf	0.399736	1
hsa_circ_0007004	hsacirc_019165	3.66667	7.33333	0	0	-Inf	0.399736	1
hsa_circ_0006093	hsacirc_012530	3.66667	7.33333	0	0	-Inf	0.399736	1
hsa_circ_0003866	hsacirc_013291	3.66667	7.33333	0	0	-Inf	0.399736	1
-	hsacirc_013473	3.66667	7.33333	0	0	-Inf	0.399736	1
hsa_circ_0083390	hsacirc_016871	3.66667	7.33333	0	0	-Inf	0.399736	1
hsa_circ_0088072	hsacirc_015620	3.66667	7.33333	0	0	-Inf	0.399736	1
-	hsacirc_008962	3.66667	7.33333	0	0	-Inf	0.399736	1
-	hsacirc_007958	3.66667	7.33333	0	0	-Inf	0.399736	1
-	hsacirc_001348	3.66667	7.33333	0	0	-Inf	0.399736	1
hsa_circ_0086490	hsacirc_002668	3.66667	7.33333	0	0	-Inf	0.399736	1
-	hsacirc_019530	3.66667	7.33333	0	0	-Inf	0.399736	1
hsa_circ_0006999	hsacirc_008261	11.9167	19.3333	4.5	0.232759	-2.10309	0.399935	1
hsa_circ_0005615	hsacirc_005328	149.25	72	226.5	3.14583	1.65344	0.401318	1
hsa_circ_0006123	hsacirc_019426	2.25	0	4.5	Inf	Inf	0.403375	1
hsa_circ_0020254	hsacirc_012209	2.25	0	4.5	Inf	Inf	0.403375	1
-	hsacirc_011046	2.25	0	4.5	Inf	Inf	0.403375	1
hsa_circ_0030430	hsacirc_000497	2.25	0	4.5	Inf	Inf	0.403375	1
hsa_circ_0000494	hsacirc_016528	2.25	0	4.5	Inf	Inf	0.403375	1
-	hsacirc_012987	2.25	0	4.5	Inf	Inf	0.403375	1
hsa_circ_0037002	hsacirc_011833	2.25	0	4.5	Inf	Inf	0.403375	1
hsa_circ_0002677	hsacirc_017009	2.25	0	4.5	Inf	Inf	0.403375	1
-	hsacirc_010337	2.25	0	4.5	Inf	Inf	0.403375	1
-	hsacirc_018826	2.25	0	4.5	Inf	Inf	0.403375	1
-	hsacirc_003783	2.25	0	4.5	Inf	Inf	0.403375	1
hsa_circ_0053036	hsacirc_019440	2.25	0	4.5	Inf	Inf	0.403375	1
hsa_circ_0006882	hsacirc_010367	2.25	0	4.5	Inf	Inf	0.403375	1
-	hsacirc_008689	2.25	0	4.5	Inf	Inf	0.403375	1
hsa_circ_0060229	hsacirc_016828	2.25	0	4.5	Inf	Inf	0.403375	1
-	hsacirc_017653	2.25	0	4.5	Inf	Inf	0.403375	1
-	hsacirc_019180	2.25	0	4.5	Inf	Inf	0.403375	1
-	hsacirc_000982	2.25	0	4.5	Inf	Inf	0.403375	1
hsa_circ_0005462	hsacirc_009836	2.25	0	4.5	Inf	Inf	0.403375	1
hsa_circ_0003758	hsacirc_001697	2.25	0	4.5	Inf	Inf	0.403375	1
hsa_circ_0073441	hsacirc_011051	2.25	0	4.5	Inf	Inf	0.403375	1
hsa_circ_0005038	hsacirc_017412	2.25	0	4.5	Inf	Inf	0.403375	1
hsa_circ_0088239	hsacirc_016647	2.25	0	4.5	Inf	Inf	0.403375	1
hsa_circ_0003247	hsacirc_018311	90.5	136	45	0.330882	-1.59561	0.404681	1
hsa_circ_0002940	hsacirc_004381	14.3333	22.6667	6	0.264706	-1.91754	0.407867	1
hsa_circ_0006308	hsacirc_001481	14.3333	22.6667	6	0.264706	-1.91754	0.407867	1
hsa_circ_0001550	hsacirc_014941	62.0833	92.6667	31.5	0.339928	-1.5567	0.408148	1
hsa_circ_0002563	hsacirc_006559	6.75	12	1.5	0.125	-3	0.408433	1
hsa_circ_0005620	hsacirc_000089	6.75	12	1.5	0.125	-3	0.408433	1
hsa_circ_0000239	hsacirc_020336	6.75	12	1.5	0.125	-3	0.408433	1
hsa_circ_0003702	hsacirc_017069	6.75	12	1.5	0.125	-3	0.408433	1
hsa_circ_0002130	hsacirc_017681	6.75	12	1.5	0.125	-3	0.408433	1
hsa_circ_0001566	hsacirc_017089	16.75	26	7.5	0.288462	-1.79355	0.414586	1
hsa_circ_0000337	hsacirc_006215	21.9167	33.3333	10.5	0.315	-1.66658	0.41555	1
hsa_circ_0004873	hsacirc_000482	11.5833	18.6667	4.5	0.241071	-2.05247	0.417368	1
-	hsacirc_016189	11.5833	18.6667	4.5	0.241071	-2.05247	0.417368	1
hsa_circ_0008662	hsacirc_005702	9.16667	15.3333	3	0.195652	-2.35364	0.417412	1
hsa_circ_0000676	hsacirc_002824	9.16667	15.3333	3	0.195652	-2.35364	0.417412	1
hsa_circ_0002972	hsacirc_016550	9.16667	15.3333	3	0.195652	-2.35364	0.417412	1
hsa_circ_0001850	hsacirc_006477	9.16667	15.3333	3	0.195652	-2.35364	0.417412	1
hsa_circ_0001922	hsacirc_018512	38.0833	56.6667	19.5	0.344118	-1.53903	0.419984	1
hsa_circ_0007365	hsacirc_018584	14	22	6	0.272727	-1.87447	0.422442	1
hsa_circ_0000724	hsacirc_009818	34.8333	18.6667	51	2.73214	1.45003	0.423472	1
hsa_circ_0005982	hsacirc_005584	31.9167	47.3333	16.5	0.348592	-1.52039	0.432411	1
hsa_circ_0007868	hsacirc_016834	3.33333	6.66667	0	0	-Inf	0.432801	1
hsa_circ_0003126	hsacirc_010299	3.33333	6.66667	0	0	-Inf	0.432801	1
hsa_circ_0002402	hsacirc_013606	3.33333	6.66667	0	0	-Inf	0.432801	1
-	hsacirc_010492	3.33333	6.66667	0	0	-Inf	0.432801	1
hsa_circ_0003413	hsacirc_012872	3.33333	6.66667	0	0	-Inf	0.432801	1
-	hsacirc_002856	3.33333	6.66667	0	0	-Inf	0.432801	1
hsa_circ_0017041	hsacirc_003018	3.33333	6.66667	0	0	-Inf	0.432801	1
-	hsacirc_012657	3.33333	6.66667	0	0	-Inf	0.432801	1
hsa_circ_0003793	hsacirc_006312	3.33333	6.66667	0	0	-Inf	0.432801	1
-	hsacirc_001665	3.33333	6.66667	0	0	-Inf	0.432801	1
-	hsacirc_016014	3.33333	6.66667	0	0	-Inf	0.432801	1
hsa_circ_0006198	hsacirc_000586	3.33333	6.66667	0	0	-Inf	0.432801	1
hsa_circ_0005589	hsacirc_003364	3.33333	6.66667	0	0	-Inf	0.432801	1
hsa_circ_0003509	hsacirc_018029	3.33333	6.66667	0	0	-Inf	0.432801	1
hsa_circ_0023190	hsacirc_014884	3.33333	6.66667	0	0	-Inf	0.432801	1
-	hsacirc_007349	3.33333	6.66667	0	0	-Inf	0.432801	1
hsa_circ_0008567	hsacirc_010595	3.33333	6.66667	0	0	-Inf	0.432801	1
-	hsacirc_000688	3.33333	6.66667	0	0	-Inf	0.432801	1
hsa_circ_0004448	hsacirc_009005	3.33333	6.66667	0	0	-Inf	0.432801	1
-	hsacirc_018797	3.33333	6.66667	0	0	-Inf	0.432801	1
hsa_circ_0000498	hsacirc_007881	3.33333	6.66667	0	0	-Inf	0.432801	1
-	hsacirc_012244	3.33333	6.66667	0	0	-Inf	0.432801	1
-	hsacirc_001372	3.33333	6.66667	0	0	-Inf	0.432801	1
-	hsacirc_004995	3.33333	6.66667	0	0	-Inf	0.432801	1
hsa_circ_0006380	hsacirc_012467	3.33333	6.66667	0	0	-Inf	0.432801	1
hsa_circ_0006068	hsacirc_007813	3.33333	6.66667	0	0	-Inf	0.432801	1
hsa_circ_0037010	hsacirc_013031	3.33333	6.66667	0	0	-Inf	0.432801	1
hsa_circ_0038487	hsacirc_007716	3.33333	6.66667	0	0	-Inf	0.432801	1
hsa_circ_0006719	hsacirc_020390	3.33333	6.66667	0	0	-Inf	0.432801	1
hsa_circ_0039783	hsacirc_010390	3.33333	6.66667	0	0	-Inf	0.432801	1
hsa_circ_0005220	hsacirc_004404	3.33333	6.66667	0	0	-Inf	0.432801	1
-	hsacirc_014076	3.33333	6.66667	0	0	-Inf	0.432801	1
hsa_circ_0007706	hsacirc_001392	3.33333	6.66667	0	0	-Inf	0.432801	1
-	hsacirc_006585	3.33333	6.66667	0	0	-Inf	0.432801	1
-	hsacirc_008401	3.33333	6.66667	0	0	-Inf	0.432801	1
hsa_circ_0000914	hsacirc_008701	3.33333	6.66667	0	0	-Inf	0.432801	1
hsa_circ_0003745	hsacirc_001786	3.33333	6.66667	0	0	-Inf	0.432801	1
-	hsacirc_006387	3.33333	6.66667	0	0	-Inf	0.432801	1
hsa_circ_0049098	hsacirc_018493	3.33333	6.66667	0	0	-Inf	0.432801	1
hsa_circ_0056262	hsacirc_016596	3.33333	6.66667	0	0	-Inf	0.432801	1
hsa_circ_0008298	hsacirc_008307	3.33333	6.66667	0	0	-Inf	0.432801	1
-	hsacirc_000652	3.33333	6.66667	0	0	-Inf	0.432801	1
hsa_circ_0006729	hsacirc_018483	3.33333	6.66667	0	0	-Inf	0.432801	1
hsa_circ_0006917	hsacirc_012256	3.33333	6.66667	0	0	-Inf	0.432801	1
hsa_circ_0060989	hsacirc_001773	3.33333	6.66667	0	0	-Inf	0.432801	1
-	hsacirc_004306	3.33333	6.66667	0	0	-Inf	0.432801	1
hsa_circ_0001966	hsacirc_009488	3.33333	6.66667	0	0	-Inf	0.432801	1
hsa_circ_0061877	hsacirc_016667	3.33333	6.66667	0	0	-Inf	0.432801	1
hsa_circ_0002610	hsacirc_005590	3.33333	6.66667	0	0	-Inf	0.432801	1
hsa_circ_0066784	hsacirc_001139	3.33333	6.66667	0	0	-Inf	0.432801	1
-	hsacirc_019060	3.33333	6.66667	0	0	-Inf	0.432801	1
hsa_circ_0005797	hsacirc_001901	3.33333	6.66667	0	0	-Inf	0.432801	1
hsa_circ_0067494	hsacirc_011553	3.33333	6.66667	0	0	-Inf	0.432801	1
hsa_circ_0067582	hsacirc_009665	3.33333	6.66667	0	0	-Inf	0.432801	1
-	hsacirc_009345	3.33333	6.66667	0	0	-Inf	0.432801	1
hsa_circ_0004616	hsacirc_017394	3.33333	6.66667	0	0	-Inf	0.432801	1
-	hsacirc_018017	3.33333	6.66667	0	0	-Inf	0.432801	1
hsa_circ_0008062	hsacirc_018220	3.33333	6.66667	0	0	-Inf	0.432801	1
-	hsacirc_008249	3.33333	6.66667	0	0	-Inf	0.432801	1
-	hsacirc_014699	3.33333	6.66667	0	0	-Inf	0.432801	1
hsa_circ_0069590	hsacirc_017190	3.33333	6.66667	0	0	-Inf	0.432801	1
hsa_circ_0073491	hsacirc_011522	3.33333	6.66667	0	0	-Inf	0.432801	1
-	hsacirc_012620	3.33333	6.66667	0	0	-Inf	0.432801	1
hsa_circ_0003544	hsacirc_009911	3.33333	6.66667	0	0	-Inf	0.432801	1
hsa_circ_0002633	hsacirc_012390	3.33333	6.66667	0	0	-Inf	0.432801	1
hsa_circ_0071655	hsacirc_004019	3.33333	6.66667	0	0	-Inf	0.432801	1
-	hsacirc_003813	3.33333	6.66667	0	0	-Inf	0.432801	1
hsa_circ_0006887	hsacirc_007922	3.33333	6.66667	0	0	-Inf	0.432801	1
hsa_circ_0077956	hsacirc_008565	3.33333	6.66667	0	0	-Inf	0.432801	1
hsa_circ_0001583	hsacirc_015670	3.33333	6.66667	0	0	-Inf	0.432801	1
hsa_circ_0081339	hsacirc_007422	3.33333	6.66667	0	0	-Inf	0.432801	1
-	hsacirc_019438	3.33333	6.66667	0	0	-Inf	0.432801	1
hsa_circ_0085778	hsacirc_000243	3.33333	6.66667	0	0	-Inf	0.432801	1
hsa_circ_0001832	hsacirc_004145	3.33333	6.66667	0	0	-Inf	0.432801	1
hsa_circ_0001799	hsacirc_017823	3.33333	6.66667	0	0	-Inf	0.432801	1
-	hsacirc_003194	3.33333	6.66667	0	0	-Inf	0.432801	1
hsa_circ_0003362	hsacirc_014587	3.33333	6.66667	0	0	-Inf	0.432801	1
hsa_circ_0089727	hsacirc_012308	3.33333	6.66667	0	0	-Inf	0.432801	1
-	hsacirc_013543	3.33333	6.66667	0	0	-Inf	0.432801	1
hsa_circ_0087432	hsacirc_019868	3.33333	6.66667	0	0	-Inf	0.432801	1
hsa_circ_0089972	hsacirc_008305	3.33333	6.66667	0	0	-Inf	0.432801	1
-	hsacirc_008525	3.33333	6.66667	0	0	-Inf	0.432801	1
hsa_circ_0001900	hsacirc_015690	170.917	259.333	82.5	0.318123	-1.65234	0.434017	1
-	hsacirc_003790	6.41667	11.3333	1.5	0.132353	-2.91754	0.434517	1
hsa_circ_0004227	hsacirc_000024	6.41667	11.3333	1.5	0.132353	-2.91754	0.434517	1
hsa_circ_0001554	hsacirc_001929	6.41667	11.3333	1.5	0.132353	-2.91754	0.434517	1
hsa_circ_0004101	hsacirc_007636	6.41667	11.3333	1.5	0.132353	-2.91754	0.434517	1
-	hsacirc_003261	5.16667	1.33333	9	6.75	2.75489	0.434583	1
-	hsacirc_005259	5.16667	1.33333	9	6.75	2.75489	0.434583	1
-	hsacirc_006246	5.16667	1.33333	9	6.75	2.75489	0.434583	1
-	hsacirc_008179	5.16667	1.33333	9	6.75	2.75489	0.434583	1
-	hsacirc_008760	5.16667	1.33333	9	6.75	2.75489	0.434583	1
hsa_circ_0006751	hsacirc_013071	5.16667	1.33333	9	6.75	2.75489	0.434583	1
-	hsacirc_005963	5.16667	1.33333	9	6.75	2.75489	0.434583	1
hsa_circ_0007487	hsacirc_017907	5.16667	1.33333	9	6.75	2.75489	0.434583	1
hsa_circ_0036103	hsacirc_003685	5.16667	1.33333	9	6.75	2.75489	0.434583	1
-	hsacirc_011228	5.16667	1.33333	9	6.75	2.75489	0.434583	1
hsa_circ_0046209	hsacirc_017593	5.16667	1.33333	9	6.75	2.75489	0.434583	1
-	hsacirc_010061	5.16667	1.33333	9	6.75	2.75489	0.434583	1
hsa_circ_0064336	hsacirc_015131	5.16667	1.33333	9	6.75	2.75489	0.434583	1
hsa_circ_0066438	hsacirc_016380	5.16667	1.33333	9	6.75	2.75489	0.434583	1
-	hsacirc_016515	5.16667	1.33333	9	6.75	2.75489	0.434583	1
hsa_circ_0070260	hsacirc_015278	5.16667	1.33333	9	6.75	2.75489	0.434583	1
-	hsacirc_002448	5.16667	1.33333	9	6.75	2.75489	0.434583	1
hsa_circ_0003830	hsacirc_007511	5.16667	1.33333	9	6.75	2.75489	0.434583	1
hsa_circ_0004405	hsacirc_014881	5.16667	1.33333	9	6.75	2.75489	0.434583	1
hsa_circ_0075917	hsacirc_016691	5.16667	1.33333	9	6.75	2.75489	0.434583	1
-	hsacirc_009803	5.16667	1.33333	9	6.75	2.75489	0.434583	1
hsa_circ_0008540	hsacirc_008731	5.16667	1.33333	9	6.75	2.75489	0.434583	1
-	hsacirc_006775	5.16667	1.33333	9	6.75	2.75489	0.434583	1
hsa_circ_0007023	hsacirc_008393	5.16667	1.33333	9	6.75	2.75489	0.434583	1
hsa_circ_0001687	hsacirc_012190	5.16667	1.33333	9	6.75	2.75489	0.434583	1
hsa_circ_0002731	hsacirc_019067	5.16667	1.33333	9	6.75	2.75489	0.434583	1
hsa_circ_0007271	hsacirc_007657	5.16667	1.33333	9	6.75	2.75489	0.434583	1
hsa_circ_0009127	hsacirc_005804	5.16667	1.33333	9	6.75	2.75489	0.434583	1
hsa_circ_0001910	hsacirc_005140	5.16667	1.33333	9	6.75	2.75489	0.434583	1
hsa_circ_0006172	hsacirc_005082	5.16667	1.33333	9	6.75	2.75489	0.434583	1
hsa_circ_0000669	hsacirc_005236	21.25	32	10.5	0.328125	-1.60768	0.435774	1
hsa_circ_0003846	hsacirc_000334	11.25	18	4.5	0.25	-2	0.435935	1
-	hsacirc_012556	11.25	18	4.5	0.25	-2	0.435935	1
hsa_circ_0009130	hsacirc_006339	39.8333	58.6667	21	0.357955	-1.48215	0.436434	1
hsa_circ_0007108	hsacirc_013376	13.6667	21.3333	6	0.28125	-1.83007	0.437717	1
hsa_circ_0066631	hsacirc_009065	11.6667	5.33333	18	3.375	1.75489	0.43925	1
hsa_circ_0027440	hsacirc_016010	18.1667	9.33333	27	2.89286	1.5325	0.439427	1
hsa_circ_0007489	hsacirc_017981	8.83333	14.6667	3	0.204545	-2.28951	0.439877	1
hsa_circ_0008534	hsacirc_009644	8.83333	14.6667	3	0.204545	-2.28951	0.439877	1
hsa_circ_0002808	hsacirc_009011	8.83333	14.6667	3	0.204545	-2.28951	0.439877	1
hsa_circ_0007822	hsacirc_005188	36.25	20	52.5	2.625	1.39232	0.440687	1
-	hsacirc_005116	10.5833	4.66667	16.5	3.53571	1.822	0.441998	1
hsa_circ_0069492	hsacirc_002934	10.5833	4.66667	16.5	3.53571	1.822	0.441998	1
hsa_circ_0005955	hsacirc_011906	55.6667	81.3333	30	0.368852	-1.43888	0.445121	1
hsa_circ_0018200	hsacirc_000466	9.5	4	15	3.75	1.90689	0.445884	1
hsa_circ_0030632	hsacirc_009253	9.5	4	15	3.75	1.90689	0.445884	1
hsa_circ_0002872	hsacirc_001927	9.5	4	15	3.75	1.90689	0.445884	1
hsa_circ_0001890	hsacirc_014983	31.25	46	16.5	0.358696	-1.47917	0.446265	1
hsa_circ_0009061	hsacirc_018407	93.1667	51.3333	135	2.62987	1.39499	0.446339	1
-	hsacirc_003841	6.25	2	10.5	5.25	2.39232	0.44689	1
hsa_circ_0007550	hsacirc_002438	6.25	2	10.5	5.25	2.39232	0.44689	1
hsa_circ_0057105	hsacirc_007568	6.25	2	10.5	5.25	2.39232	0.44689	1
hsa_circ_0017241	hsacirc_006480	8.41667	3.33333	13.5	4.05	2.01792	0.449113	1
hsa_circ_0001578	hsacirc_015587	8.41667	3.33333	13.5	4.05	2.01792	0.449113	1
hsa_circ_0077426	hsacirc_017832	8.41667	3.33333	13.5	4.05	2.01792	0.449113	1
-	hsacirc_011469	8.41667	3.33333	13.5	4.05	2.01792	0.449113	1
hsa_circ_0018998	hsacirc_003277	7.33333	2.66667	12	4.5	2.16993	0.450563	1
hsa_circ_0008151	hsacirc_003304	7.33333	2.66667	12	4.5	2.16993	0.450563	1
-	hsacirc_011631	7.33333	2.66667	12	4.5	2.16993	0.450563	1
-	hsacirc_009671	7.33333	2.66667	12	4.5	2.16993	0.450563	1
hsa_circ_0004674	hsacirc_002839	7.33333	2.66667	12	4.5	2.16993	0.450563	1
hsa_circ_0005883	hsacirc_010652	7.33333	2.66667	12	4.5	2.16993	0.450563	1
hsa_circ_0001359	hsacirc_018393	122.917	181.333	64.5	0.355699	-1.49127	0.452175	1
hsa_circ_0001534	hsacirc_018415	15.75	24	7.5	0.3125	-1.67807	0.454796	1
hsa_circ_0006958	hsacirc_004142	10.9167	17.3333	4.5	0.259615	-1.94555	0.455662	1
hsa_circ_0001313	hsacirc_018222	72.4167	41.3333	103.5	2.50403	1.32425	0.461155	1
hsa_circ_0004509	hsacirc_000280	35.75	52	19.5	0.375	-1.41504	0.461499	1
hsa_circ_0001020	hsacirc_018071	40.9167	59.3333	22.5	0.379213	-1.39892	0.462672	1
hsa_circ_0014292	hsacirc_007544	6.08333	10.6667	1.5	0.140625	-2.83007	0.462817	1
hsa_circ_0002826	hsacirc_003255	6.08333	10.6667	1.5	0.140625	-2.83007	0.462817	1
hsa_circ_0056390	hsacirc_019129	6.08333	10.6667	1.5	0.140625	-2.83007	0.462817	1
hsa_circ_0004425	hsacirc_005518	6.08333	10.6667	1.5	0.140625	-2.83007	0.462817	1
hsa_circ_0001053	hsacirc_006035	108.25	158	58.5	0.370253	-1.43342	0.462959	1
hsa_circ_0000213	hsacirc_010730	8.5	14	3	0.214286	-2.22239	0.463647	1
hsa_circ_0005772	hsacirc_013177	8.5	14	3	0.214286	-2.22239	0.463647	1
hsa_circ_0035292	hsacirc_003606	8.5	14	3	0.214286	-2.22239	0.463647	1
hsa_circ_0005081	hsacirc_011111	8.5	14	3	0.214286	-2.22239	0.463647	1
hsa_circ_0004476	hsacirc_007792	8.5	14	3	0.214286	-2.22239	0.463647	1
hsa_circ_0004558	hsacirc_011098	8.5	14	3	0.214286	-2.22239	0.463647	1
hsa_circ_0001785	hsacirc_005264	8.5	14	3	0.214286	-2.22239	0.463647	1
hsa_circ_0007813	hsacirc_018359	19.5833	10.6667	28.5	2.67188	1.41785	0.466648	1
-	hsacirc_004061	19.5833	10.6667	28.5	2.67188	1.41785	0.466648	1
-	hsacirc_016732	18.5	10	27	2.7	1.43296	0.467704	1
hsa_circ_0023923	hsacirc_000273	30.25	44	16.5	0.375	-1.41504	0.468359	1
hsa_circ_0001654	hsacirc_013479	20.25	30	10.5	0.35	-1.51457	0.468883	1
hsa_circ_0006385	hsacirc_017500	15.4167	23.3333	7.5	0.321429	-1.63743	0.469357	1
hsa_circ_0001475	hsacirc_010900	15.4167	23.3333	7.5	0.321429	-1.63743	0.469357	1
hsa_circ_0000002	hsacirc_002167	67.0833	96.6667	37.5	0.387931	-1.36613	0.469961	1
hsa_circ_0000096	hsacirc_005753	3	6	0	0	-Inf	0.470422	1
-	hsacirc_015331	3	6	0	0	-Inf	0.470422	1
hsa_circ_0008063	hsacirc_009372	3	6	0	0	-Inf	0.470422	1
-	hsacirc_019822	3	6	0	0	-Inf	0.470422	1
hsa_circ_0014414	hsacirc_012207	3	6	0	0	-Inf	0.470422	1
hsa_circ_0003572	hsacirc_008827	3	6	0	0	-Inf	0.470422	1
hsa_circ_0000168	hsacirc_013110	3	6	0	0	-Inf	0.470422	1
-	hsacirc_002936	3	6	0	0	-Inf	0.470422	1
-	hsacirc_004549	3	6	0	0	-Inf	0.470422	1
-	hsacirc_004671	3	6	0	0	-Inf	0.470422	1
-	hsacirc_005395	3	6	0	0	-Inf	0.470422	1
hsa_circ_0012947	hsacirc_003983	3	6	0	0	-Inf	0.470422	1
hsa_circ_0003580	hsacirc_006633	3	6	0	0	-Inf	0.470422	1
-	hsacirc_020020	3	6	0	0	-Inf	0.470422	1
hsa_circ_0017995	hsacirc_020219	3	6	0	0	-Inf	0.470422	1
-	hsacirc_007440	3	6	0	0	-Inf	0.470422	1
-	hsacirc_009595	3	6	0	0	-Inf	0.470422	1
hsa_circ_0008011	hsacirc_007295	3	6	0	0	-Inf	0.470422	1
hsa_circ_0023919	hsacirc_010490	3	6	0	0	-Inf	0.470422	1
hsa_circ_0007044	hsacirc_013411	3	6	0	0	-Inf	0.470422	1
-	hsacirc_004963	3	6	0	0	-Inf	0.470422	1
-	hsacirc_014431	3	6	0	0	-Inf	0.470422	1
hsa_circ_0026053	hsacirc_000770	3	6	0	0	-Inf	0.470422	1
hsa_circ_0006978	hsacirc_011012	3	6	0	0	-Inf	0.470422	1
-	hsacirc_013682	3	6	0	0	-Inf	0.470422	1
-	hsacirc_016475	3	6	0	0	-Inf	0.470422	1
hsa_circ_0007847	hsacirc_012572	3	6	0	0	-Inf	0.470422	1
hsa_circ_0032147	hsacirc_015661	3	6	0	0	-Inf	0.470422	1
hsa_circ_0000545	hsacirc_011474	3	6	0	0	-Inf	0.470422	1
-	hsacirc_016624	3	6	0	0	-Inf	0.470422	1
hsa_circ_0004506	hsacirc_008272	3	6	0	0	-Inf	0.470422	1
hsa_circ_0008454	hsacirc_014515	3	6	0	0	-Inf	0.470422	1
hsa_circ_0002988	hsacirc_020347	3	6	0	0	-Inf	0.470422	1
hsa_circ_0000665	hsacirc_002366	3	6	0	0	-Inf	0.470422	1
hsa_circ_0037517	hsacirc_011161	3	6	0	0	-Inf	0.470422	1
hsa_circ_0037563	hsacirc_003490	3	6	0	0	-Inf	0.470422	1
hsa_circ_0008716	hsacirc_003383	3	6	0	0	-Inf	0.470422	1
-	hsacirc_007165	3	6	0	0	-Inf	0.470422	1
hsa_circ_0004273	hsacirc_016291	3	6	0	0	-Inf	0.470422	1
-	hsacirc_011765	3	6	0	0	-Inf	0.470422	1
-	hsacirc_016900	3	6	0	0	-Inf	0.470422	1
hsa_circ_0002444	hsacirc_001479	3	6	0	0	-Inf	0.470422	1
hsa_circ_0053593	hsacirc_002397	3	6	0	0	-Inf	0.470422	1
hsa_circ_0054212	hsacirc_014269	3	6	0	0	-Inf	0.470422	1
hsa_circ_0008979	hsacirc_007972	3	6	0	0	-Inf	0.470422	1
hsa_circ_0007532	hsacirc_003554	3	6	0	0	-Inf	0.470422	1
hsa_circ_0008609	hsacirc_008353	3	6	0	0	-Inf	0.470422	1
hsa_circ_0002302	hsacirc_019712	3	6	0	0	-Inf	0.470422	1
hsa_circ_0060042	hsacirc_012802	3	6	0	0	-Inf	0.470422	1
-	hsacirc_017990	3	6	0	0	-Inf	0.470422	1
hsa_circ_0004706	hsacirc_019187	3	6	0	0	-Inf	0.470422	1
-	hsacirc_005417	3	6	0	0	-Inf	0.470422	1
hsa_circ_0001315	hsacirc_001686	3	6	0	0	-Inf	0.470422	1
hsa_circ_0006558	hsacirc_011516	3	6	0	0	-Inf	0.470422	1
hsa_circ_0008177	hsacirc_016238	3	6	0	0	-Inf	0.470422	1
-	hsacirc_002716	3	6	0	0	-Inf	0.470422	1
-	hsacirc_012706	3	6	0	0	-Inf	0.470422	1
hsa_circ_0008621	hsacirc_001982	3	6	0	0	-Inf	0.470422	1
hsa_circ_0005777	hsacirc_010517	3	6	0	0	-Inf	0.470422	1
hsa_circ_0004826	hsacirc_013166	3	6	0	0	-Inf	0.470422	1
hsa_circ_0007370	hsacirc_009172	3	6	0	0	-Inf	0.470422	1
-	hsacirc_009344	3	6	0	0	-Inf	0.470422	1
-	hsacirc_008322	3	6	0	0	-Inf	0.470422	1
hsa_circ_0007864	hsacirc_011743	3	6	0	0	-Inf	0.470422	1
hsa_circ_0079812	hsacirc_000562	3	6	0	0	-Inf	0.470422	1
hsa_circ_0006302	hsacirc_005542	3	6	0	0	-Inf	0.470422	1
-	hsacirc_001220	3	6	0	0	-Inf	0.470422	1
hsa_circ_0089282	hsacirc_001949	3	6	0	0	-Inf	0.470422	1
hsa_circ_0089415	hsacirc_017870	3	6	0	0	-Inf	0.470422	1
-	hsacirc_000124	3	6	0	0	-Inf	0.470422	1
hsa_circ_0089728	hsacirc_002675	3	6	0	0	-Inf	0.470422	1
hsa_circ_0001905	hsacirc_006953	3	6	0	0	-Inf	0.470422	1
hsa_circ_0003410	hsacirc_010482	3	6	0	0	-Inf	0.470422	1
-	hsacirc_009434	3	6	0	0	-Inf	0.470422	1
hsa_circ_0089823	hsacirc_007890	3	6	0	0	-Inf	0.470422	1
hsa_circ_0005768	hsacirc_004853	27.5	40	15	0.375	-1.41504	0.473431	1
-	hsacirc_013772	3.33333	0.666667	6	9	3.16993	0.474514	1
hsa_circ_0005994	hsacirc_007637	3.33333	0.666667	6	9	3.16993	0.474514	1
hsa_circ_0020028	hsacirc_014993	3.33333	0.666667	6	9	3.16993	0.474514	1
hsa_circ_0000295	hsacirc_001311	3.33333	0.666667	6	9	3.16993	0.474514	1
-	hsacirc_017509	3.33333	0.666667	6	9	3.16993	0.474514	1
hsa_circ_0030051	hsacirc_009031	3.33333	0.666667	6	9	3.16993	0.474514	1
hsa_circ_0006607	hsacirc_011682	3.33333	0.666667	6	9	3.16993	0.474514	1
hsa_circ_0005347	hsacirc_006794	3.33333	0.666667	6	9	3.16993	0.474514	1
hsa_circ_0000798	hsacirc_017016	3.33333	0.666667	6	9	3.16993	0.474514	1
-	hsacirc_008552	3.33333	0.666667	6	9	3.16993	0.474514	1
-	hsacirc_017778	3.33333	0.666667	6	9	3.16993	0.474514	1
hsa_circ_0002382	hsacirc_001296	3.33333	0.666667	6	9	3.16993	0.474514	1
hsa_circ_0001280	hsacirc_005996	3.33333	0.666667	6	9	3.16993	0.474514	1
-	hsacirc_020366	3.33333	0.666667	6	9	3.16993	0.474514	1
hsa_circ_0001613	hsacirc_009555	3.33333	0.666667	6	9	3.16993	0.474514	1
hsa_circ_0001818	hsacirc_005550	3.33333	0.666667	6	9	3.16993	0.474514	1
hsa_circ_0005050	hsacirc_007914	10.5833	16.6667	4.5	0.27	-1.88897	0.476576	1
hsa_circ_0008466	hsacirc_009592	12	6	18	3	1.58496	0.480171	1
hsa_circ_0004380	hsacirc_015177	12	6	18	3	1.58496	0.480171	1
hsa_circ_0005898	hsacirc_020274	24.75	36	13.5	0.375	-1.41504	0.480846	1
hsa_circ_0005465	hsacirc_005909	15.0833	22.6667	7.5	0.330882	-1.59561	0.484545	1
-	hsacirc_013444	32.9167	19.3333	46.5	2.40517	1.26614	0.484887	1
hsa_circ_0085465	hsacirc_016005	37.25	22	52.5	2.38636	1.25481	0.485477	1
hsa_circ_0002038	hsacirc_005717	10.9167	5.33333	16.5	3.09375	1.62936	0.485761	1
hsa_circ_0032822	hsacirc_020364	10.9167	5.33333	16.5	3.09375	1.62936	0.485761	1
hsa_circ_0008168	hsacirc_002267	10.9167	5.33333	16.5	3.09375	1.62936	0.485761	1
hsa_circ_0006818	hsacirc_006739	10.9167	5.33333	16.5	3.09375	1.62936	0.485761	1
hsa_circ_0000044	hsacirc_007659	12.6667	19.3333	6	0.310345	-1.68806	0.488172	1
hsa_circ_0001833	hsacirc_001717	12.6667	19.3333	6	0.310345	-1.68806	0.488172	1
-	hsacirc_009656	8.16667	13.3333	3	0.225	-2.152	0.488669	1
hsa_circ_0003873	hsacirc_001562	8.16667	13.3333	3	0.225	-2.152	0.488669	1
-	hsacirc_016466	8.16667	13.3333	3	0.225	-2.152	0.488669	1
-	hsacirc_015766	8.16667	13.3333	3	0.225	-2.152	0.488669	1
hsa_circ_0001423	hsacirc_014199	54.75	78	31.5	0.403846	-1.30812	0.488948	1
hsa_circ_0005260	hsacirc_010964	22	32	12	0.375	-1.41504	0.491289	1
hsa_circ_0006467	hsacirc_005204	5.75	10	1.5	0.15	-2.73697	0.492888	1
hsa_circ_0004063	hsacirc_017586	5.75	10	1.5	0.15	-2.73697	0.492888	1
-	hsacirc_011908	5.75	10	1.5	0.15	-2.73697	0.492888	1
hsa_circ_0002186	hsacirc_002875	5.75	10	1.5	0.15	-2.73697	0.492888	1
-	hsacirc_013652	5.75	10	1.5	0.15	-2.73697	0.492888	1
hsa_circ_0008587	hsacirc_015001	19.9167	11.3333	28.5	2.51471	1.33039	0.493021	1
hsa_circ_0009172	hsacirc_003785	9.83333	4.66667	15	3.21429	1.6845	0.493473	1
hsa_circ_0000397	hsacirc_010263	9.83333	4.66667	15	3.21429	1.6845	0.493473	1
-	hsacirc_003137	34.0833	48.6667	19.5	0.400685	-1.31946	0.495217	1
hsa_circ_0011536	hsacirc_003847	46.5	66	27	0.409091	-1.28951	0.497081	1
hsa_circ_0005037	hsacirc_005191	221.333	328.667	114	0.346856	-1.52759	0.498181	1
hsa_circ_0005273	hsacirc_004502	10.25	16	4.5	0.28125	-1.83007	0.498691	1
hsa_circ_0001451	hsacirc_003311	51.6667	31.3333	72	2.29787	1.2003	0.499928	1
hsa_circ_0005632	hsacirc_011706	16.6667	9.33333	24	2.57143	1.36257	0.501403	1
hsa_circ_0004217	hsacirc_004309	8.75	4	13.5	3.375	1.75489	0.501919	1
hsa_circ_0051123	hsacirc_018041	8.75	4	13.5	3.375	1.75489	0.501919	1
hsa_circ_0008797	hsacirc_009986	8.75	4	13.5	3.375	1.75489	0.501919	1
hsa_circ_0001436	hsacirc_015412	8.75	4	13.5	3.375	1.75489	0.501919	1
hsa_circ_0066874	hsacirc_010395	51	72	30	0.416667	-1.26303	0.505139	1
hsa_circ_0006595	hsacirc_002074	12.3333	18.6667	6	0.321429	-1.63743	0.506787	1
hsa_circ_0002931	hsacirc_017278	12.3333	18.6667	6	0.321429	-1.63743	0.506787	1
hsa_circ_0007380	hsacirc_012429	12.3333	18.6667	6	0.321429	-1.63743	0.506787	1
hsa_circ_0003008	hsacirc_008224	4.41667	1.33333	7.5	5.625	2.49185	0.509	1
hsa_circ_0002166	hsacirc_007175	4.41667	1.33333	7.5	5.625	2.49185	0.509	1
hsa_circ_0002255	hsacirc_011650	4.41667	1.33333	7.5	5.625	2.49185	0.509	1
hsa_circ_0042799	hsacirc_020015	4.41667	1.33333	7.5	5.625	2.49185	0.509	1
hsa_circ_0047021	hsacirc_006269	4.41667	1.33333	7.5	5.625	2.49185	0.509	1
hsa_circ_0008705	hsacirc_010225	4.41667	1.33333	7.5	5.625	2.49185	0.509	1
-	hsacirc_013164	4.41667	1.33333	7.5	5.625	2.49185	0.509	1
-	hsacirc_013170	4.41667	1.33333	7.5	5.625	2.49185	0.509	1
hsa_circ_0001798	hsacirc_014914	14.5	8	21	2.625	1.39232	0.509249	1
hsa_circ_0008075	hsacirc_013339	14.5	8	21	2.625	1.39232	0.509249	1
hsa_circ_0066776	hsacirc_019351	26.1667	37.3333	15	0.401786	-1.3155	0.509721	1
hsa_circ_0007287	hsacirc_018205	7.66667	3.33333	12	3.6	1.848	0.510321	1
hsa_circ_0001635	hsacirc_009166	7.66667	3.33333	12	3.6	1.848	0.510321	1
hsa_circ_0005284	hsacirc_015387	7.66667	3.33333	12	3.6	1.848	0.510321	1
-	hsacirc_016974	7.66667	3.33333	12	3.6	1.848	0.510321	1
hsa_circ_0006127	hsacirc_000728	16.8333	24.6667	9	0.364865	-1.45457	0.510397	1
hsa_circ_0084604	hsacirc_011728	13.4167	7.33333	19.5	2.65909	1.41093	0.514062	1
hsa_circ_0089371	hsacirc_001377	21.3333	30.6667	12	0.391304	-1.35364	0.514306	1
hsa_circ_0013644	hsacirc_016827	2.66667	5.33333	0	0	-Inf	0.514828	1
-	hsacirc_015548	2.66667	5.33333	0	0	-Inf	0.514828	1
hsa_circ_0007608	hsacirc_006729	2.66667	5.33333	0	0	-Inf	0.514828	1
-	hsacirc_001937	2.66667	5.33333	0	0	-Inf	0.514828	1
-	hsacirc_006809	2.66667	5.33333	0	0	-Inf	0.514828	1
hsa_circ_0006827	hsacirc_010195	2.66667	5.33333	0	0	-Inf	0.514828	1
hsa_circ_0002274	hsacirc_010542	2.66667	5.33333	0	0	-Inf	0.514828	1
hsa_circ_0004039	hsacirc_002285	2.66667	5.33333	0	0	-Inf	0.514828	1
hsa_circ_0002452	hsacirc_010054	2.66667	5.33333	0	0	-Inf	0.514828	1
hsa_circ_0004949	hsacirc_005988	2.66667	5.33333	0	0	-Inf	0.514828	1
hsa_circ_0012144	hsacirc_000032	2.66667	5.33333	0	0	-Inf	0.514828	1
hsa_circ_0005661	hsacirc_016442	2.66667	5.33333	0	0	-Inf	0.514828	1
hsa_circ_0017713	hsacirc_015111	2.66667	5.33333	0	0	-Inf	0.514828	1
hsa_circ_0017724	hsacirc_005123	2.66667	5.33333	0	0	-Inf	0.514828	1
-	hsacirc_013246	2.66667	5.33333	0	0	-Inf	0.514828	1
-	hsacirc_009129	2.66667	5.33333	0	0	-Inf	0.514828	1
hsa_circ_0007997	hsacirc_018517	2.66667	5.33333	0	0	-Inf	0.514828	1
hsa_circ_0005190	hsacirc_017013	2.66667	5.33333	0	0	-Inf	0.514828	1
-	hsacirc_010926	2.66667	5.33333	0	0	-Inf	0.514828	1
-	hsacirc_018508	2.66667	5.33333	0	0	-Inf	0.514828	1
-	hsacirc_002198	2.66667	5.33333	0	0	-Inf	0.514828	1
-	hsacirc_016649	2.66667	5.33333	0	0	-Inf	0.514828	1
hsa_circ_0024323	hsacirc_018213	2.66667	5.33333	0	0	-Inf	0.514828	1
hsa_circ_0022046	hsacirc_013128	2.66667	5.33333	0	0	-Inf	0.514828	1
-	hsacirc_012975	2.66667	5.33333	0	0	-Inf	0.514828	1
hsa_circ_0023216	hsacirc_000737	2.66667	5.33333	0	0	-Inf	0.514828	1
hsa_circ_0001968	hsacirc_017575	2.66667	5.33333	0	0	-Inf	0.514828	1
hsa_circ_0023920	hsacirc_010582	2.66667	5.33333	0	0	-Inf	0.514828	1
-	hsacirc_012268	2.66667	5.33333	0	0	-Inf	0.514828	1
-	hsacirc_019529	2.66667	5.33333	0	0	-Inf	0.514828	1
-	hsacirc_005946	2.66667	5.33333	0	0	-Inf	0.514828	1
hsa_circ_0000374	hsacirc_004467	2.66667	5.33333	0	0	-Inf	0.514828	1
-	hsacirc_003207	2.66667	5.33333	0	0	-Inf	0.514828	1
-	hsacirc_007619	2.66667	5.33333	0	0	-Inf	0.514828	1
-	hsacirc_012477	2.66667	5.33333	0	0	-Inf	0.514828	1
hsa_circ_0004313	hsacirc_006325	2.66667	5.33333	0	0	-Inf	0.514828	1
-	hsacirc_016421	2.66667	5.33333	0	0	-Inf	0.514828	1
hsa_circ_0008881	hsacirc_008937	2.66667	5.33333	0	0	-Inf	0.514828	1
hsa_circ_0000478	hsacirc_013409	2.66667	5.33333	0	0	-Inf	0.514828	1
-	hsacirc_015212	2.66667	5.33333	0	0	-Inf	0.514828	1
hsa_circ_0030386	hsacirc_003026	2.66667	5.33333	0	0	-Inf	0.514828	1
-	hsacirc_009604	2.66667	5.33333	0	0	-Inf	0.514828	1
hsa_circ_0008758	hsacirc_010672	2.66667	5.33333	0	0	-Inf	0.514828	1
hsa_circ_0004110	hsacirc_016946	2.66667	5.33333	0	0	-Inf	0.514828	1
hsa_circ_0036353	hsacirc_009324	2.66667	5.33333	0	0	-Inf	0.514828	1
hsa_circ_0036649	hsacirc_002171	2.66667	5.33333	0	0	-Inf	0.514828	1
hsa_circ_0036858	hsacirc_006270	2.66667	5.33333	0	0	-Inf	0.514828	1
hsa_circ_0036983	hsacirc_008376	2.66667	5.33333	0	0	-Inf	0.514828	1
hsa_circ_0000673	hsacirc_011819	2.66667	5.33333	0	0	-Inf	0.514828	1
hsa_circ_0038673	hsacirc_001634	2.66667	5.33333	0	0	-Inf	0.514828	1
hsa_circ_0037658	hsacirc_009325	2.66667	5.33333	0	0	-Inf	0.514828	1
-	hsacirc_004653	2.66667	5.33333	0	0	-Inf	0.514828	1
hsa_circ_0040227	hsacirc_019137	2.66667	5.33333	0	0	-Inf	0.514828	1
hsa_circ_0003315	hsacirc_020084	2.66667	5.33333	0	0	-Inf	0.514828	1
hsa_circ_0040813	hsacirc_014550	2.66667	5.33333	0	0	-Inf	0.514828	1
hsa_circ_0042986	hsacirc_004206	2.66667	5.33333	0	0	-Inf	0.514828	1
-	hsacirc_013195	2.66667	5.33333	0	0	-Inf	0.514828	1
hsa_circ_0043522	hsacirc_012883	2.66667	5.33333	0	0	-Inf	0.514828	1
hsa_circ_0004422	hsacirc_016580	2.66667	5.33333	0	0	-Inf	0.514828	1
hsa_circ_0008310	hsacirc_019916	2.66667	5.33333	0	0	-Inf	0.514828	1
hsa_circ_0046580	hsacirc_000775	2.66667	5.33333	0	0	-Inf	0.514828	1
-	hsacirc_000650	2.66667	5.33333	0	0	-Inf	0.514828	1
-	hsacirc_019118	2.66667	5.33333	0	0	-Inf	0.514828	1
-	hsacirc_000546	2.66667	5.33333	0	0	-Inf	0.514828	1
hsa_circ_0047964	hsacirc_017430	2.66667	5.33333	0	0	-Inf	0.514828	1
-	hsacirc_006203	2.66667	5.33333	0	0	-Inf	0.514828	1
-	hsacirc_002762	2.66667	5.33333	0	0	-Inf	0.514828	1
hsa_circ_0048259	hsacirc_003273	2.66667	5.33333	0	0	-Inf	0.514828	1
-	hsacirc_019197	2.66667	5.33333	0	0	-Inf	0.514828	1
hsa_circ_0008037	hsacirc_000608	2.66667	5.33333	0	0	-Inf	0.514828	1
-	hsacirc_000905	2.66667	5.33333	0	0	-Inf	0.514828	1
-	hsacirc_004241	2.66667	5.33333	0	0	-Inf	0.514828	1
hsa_circ_0049024	hsacirc_002942	2.66667	5.33333	0	0	-Inf	0.514828	1
hsa_circ_0001057	hsacirc_017735	2.66667	5.33333	0	0	-Inf	0.514828	1
-	hsacirc_005547	2.66667	5.33333	0	0	-Inf	0.514828	1
hsa_circ_0001079	hsacirc_015300	2.66667	5.33333	0	0	-Inf	0.514828	1
hsa_circ_0002431	hsacirc_018645	2.66667	5.33333	0	0	-Inf	0.514828	1
hsa_circ_0054391	hsacirc_003740	2.66667	5.33333	0	0	-Inf	0.514828	1
hsa_circ_0007493	hsacirc_004016	2.66667	5.33333	0	0	-Inf	0.514828	1
hsa_circ_0004643	hsacirc_005580	2.66667	5.33333	0	0	-Inf	0.514828	1
hsa_circ_0001032	hsacirc_002361	2.66667	5.33333	0	0	-Inf	0.514828	1
hsa_circ_0004964	hsacirc_015562	2.66667	5.33333	0	0	-Inf	0.514828	1
-	hsacirc_006235	2.66667	5.33333	0	0	-Inf	0.514828	1
hsa_circ_0006653	hsacirc_003799	2.66667	5.33333	0	0	-Inf	0.514828	1
hsa_circ_0060639	hsacirc_008966	2.66667	5.33333	0	0	-Inf	0.514828	1
-	hsacirc_005893	2.66667	5.33333	0	0	-Inf	0.514828	1
hsa_circ_0060953	hsacirc_008840	2.66667	5.33333	0	0	-Inf	0.514828	1
hsa_circ_0061081	hsacirc_011525	2.66667	5.33333	0	0	-Inf	0.514828	1
-	hsacirc_008640	2.66667	5.33333	0	0	-Inf	0.514828	1
hsa_circ_0061485	hsacirc_015253	2.66667	5.33333	0	0	-Inf	0.514828	1
hsa_circ_0002369	hsacirc_016573	2.66667	5.33333	0	0	-Inf	0.514828	1
-	hsacirc_003002	2.66667	5.33333	0	0	-Inf	0.514828	1
hsa_circ_0002903	hsacirc_004629	2.66667	5.33333	0	0	-Inf	0.514828	1
hsa_circ_0008668	hsacirc_014986	2.66667	5.33333	0	0	-Inf	0.514828	1
-	hsacirc_015410	2.66667	5.33333	0	0	-Inf	0.514828	1
hsa_circ_0067230	hsacirc_003431	2.66667	5.33333	0	0	-Inf	0.514828	1
hsa_circ_0003665	hsacirc_010516	2.66667	5.33333	0	0	-Inf	0.514828	1
-	hsacirc_011366	2.66667	5.33333	0	0	-Inf	0.514828	1
hsa_circ_0064789	hsacirc_003484	2.66667	5.33333	0	0	-Inf	0.514828	1
hsa_circ_0001261	hsacirc_018496	2.66667	5.33333	0	0	-Inf	0.514828	1
hsa_circ_0065307	hsacirc_017507	2.66667	5.33333	0	0	-Inf	0.514828	1
-	hsacirc_002763	2.66667	5.33333	0	0	-Inf	0.514828	1
hsa_circ_0006563	hsacirc_012919	2.66667	5.33333	0	0	-Inf	0.514828	1
hsa_circ_0071422	hsacirc_004432	2.66667	5.33333	0	0	-Inf	0.514828	1
-	hsacirc_016702	2.66667	5.33333	0	0	-Inf	0.514828	1
hsa_circ_0003698	hsacirc_005980	2.66667	5.33333	0	0	-Inf	0.514828	1
hsa_circ_0008646	hsacirc_013994	2.66667	5.33333	0	0	-Inf	0.514828	1
hsa_circ_0007343	hsacirc_003971	2.66667	5.33333	0	0	-Inf	0.514828	1
-	hsacirc_018631	2.66667	5.33333	0	0	-Inf	0.514828	1
hsa_circ_0003696	hsacirc_002009	2.66667	5.33333	0	0	-Inf	0.514828	1
hsa_circ_0072130	hsacirc_016966	2.66667	5.33333	0	0	-Inf	0.514828	1
-	hsacirc_006237	2.66667	5.33333	0	0	-Inf	0.514828	1
-	hsacirc_015911	2.66667	5.33333	0	0	-Inf	0.514828	1
hsa_circ_0005593	hsacirc_013786	2.66667	5.33333	0	0	-Inf	0.514828	1
hsa_circ_0072576	hsacirc_011666	2.66667	5.33333	0	0	-Inf	0.514828	1
-	hsacirc_004215	2.66667	5.33333	0	0	-Inf	0.514828	1
-	hsacirc_008246	2.66667	5.33333	0	0	-Inf	0.514828	1
-	hsacirc_003877	2.66667	5.33333	0	0	-Inf	0.514828	1
-	hsacirc_004778	2.66667	5.33333	0	0	-Inf	0.514828	1
hsa_circ_0078373	hsacirc_016331	2.66667	5.33333	0	0	-Inf	0.514828	1
hsa_circ_0003016	hsacirc_001157	2.66667	5.33333	0	0	-Inf	0.514828	1
-	hsacirc_004559	2.66667	5.33333	0	0	-Inf	0.514828	1
-	hsacirc_002565	2.66667	5.33333	0	0	-Inf	0.514828	1
hsa_circ_0076254	hsacirc_014097	2.66667	5.33333	0	0	-Inf	0.514828	1
-	hsacirc_006042	2.66667	5.33333	0	0	-Inf	0.514828	1
hsa_circ_0001738	hsacirc_018495	2.66667	5.33333	0	0	-Inf	0.514828	1
hsa_circ_0003588	hsacirc_009999	2.66667	5.33333	0	0	-Inf	0.514828	1
hsa_circ_0007904	hsacirc_017783	2.66667	5.33333	0	0	-Inf	0.514828	1
hsa_circ_0006229	hsacirc_009564	2.66667	5.33333	0	0	-Inf	0.514828	1
hsa_circ_0004670	hsacirc_002041	2.66667	5.33333	0	0	-Inf	0.514828	1
hsa_circ_0004015	hsacirc_015273	2.66667	5.33333	0	0	-Inf	0.514828	1
hsa_circ_0081180	hsacirc_018703	2.66667	5.33333	0	0	-Inf	0.514828	1
hsa_circ_0001726	hsacirc_014547	2.66667	5.33333	0	0	-Inf	0.514828	1
hsa_circ_0081367	hsacirc_006063	2.66667	5.33333	0	0	-Inf	0.514828	1
hsa_circ_0085287	hsacirc_019835	2.66667	5.33333	0	0	-Inf	0.514828	1
-	hsacirc_007761	2.66667	5.33333	0	0	-Inf	0.514828	1
hsa_circ_0003066	hsacirc_006015	2.66667	5.33333	0	0	-Inf	0.514828	1
-	hsacirc_005028	2.66667	5.33333	0	0	-Inf	0.514828	1
-	hsacirc_012774	2.66667	5.33333	0	0	-Inf	0.514828	1
hsa_circ_0084678	hsacirc_016507	2.66667	5.33333	0	0	-Inf	0.514828	1
hsa_circ_0088075	hsacirc_003444	2.66667	5.33333	0	0	-Inf	0.514828	1
hsa_circ_0004688	hsacirc_001289	2.66667	5.33333	0	0	-Inf	0.514828	1
hsa_circ_0088485	hsacirc_006486	2.66667	5.33333	0	0	-Inf	0.514828	1
-	hsacirc_001084	2.66667	5.33333	0	0	-Inf	0.514828	1
hsa_circ_0005202	hsacirc_018076	2.66667	5.33333	0	0	-Inf	0.514828	1
hsa_circ_0001869	hsacirc_020033	2.66667	5.33333	0	0	-Inf	0.514828	1
hsa_circ_0001948	hsacirc_018157	2.66667	5.33333	0	0	-Inf	0.514828	1
hsa_circ_0089973	hsacirc_008300	2.66667	5.33333	0	0	-Inf	0.514828	1
-	hsacirc_000230	2.66667	5.33333	0	0	-Inf	0.514828	1
hsa_circ_0090165	hsacirc_001144	2.66667	5.33333	0	0	-Inf	0.514828	1
hsa_circ_0002172	hsacirc_006315	2.66667	5.33333	0	0	-Inf	0.514828	1
-	hsacirc_014252	2.66667	5.33333	0	0	-Inf	0.514828	1
hsa_circ_0002724	hsacirc_009940	2.66667	5.33333	0	0	-Inf	0.514828	1
hsa_circ_0004166	hsacirc_005953	7.83333	12.6667	3	0.236842	-2.078	0.515217	1
hsa_circ_0002374	hsacirc_014404	7.83333	12.6667	3	0.236842	-2.078	0.515217	1
hsa_circ_0004491	hsacirc_003308	7.83333	12.6667	3	0.236842	-2.078	0.515217	1
hsa_circ_0008010	hsacirc_011059	7.83333	12.6667	3	0.236842	-2.078	0.515217	1
hsa_circ_0060551	hsacirc_014715	7.83333	12.6667	3	0.236842	-2.078	0.515217	1
hsa_circ_0001700	hsacirc_003041	7.83333	12.6667	3	0.236842	-2.078	0.515217	1
-	hsacirc_012949	6.58333	2.66667	10.5	3.9375	1.97728	0.516612	1
hsa_circ_0001709	hsacirc_018848	6.58333	2.66667	10.5	3.9375	1.97728	0.516612	1
hsa_circ_0007071	hsacirc_009315	14.4167	21.3333	7.5	0.351562	-1.50815	0.516932	1
hsa_circ_0007231	hsacirc_019476	5.5	2	9	4.5	2.16993	0.520601	1
hsa_circ_0028021	hsacirc_012860	5.5	2	9	4.5	2.16993	0.520601	1
hsa_circ_0046999	hsacirc_007847	5.5	2	9	4.5	2.16993	0.520601	1
hsa_circ_0006480	hsacirc_012766	5.5	2	9	4.5	2.16993	0.520601	1
hsa_circ_0008590	hsacirc_008498	5.5	2	9	4.5	2.16993	0.520601	1
hsa_circ_0005261	hsacirc_019322	5.5	2	9	4.5	2.16993	0.520601	1
hsa_circ_0005695	hsacirc_007432	5.5	2	9	4.5	2.16993	0.520601	1
hsa_circ_0001317	hsacirc_016764	5.5	2	9	4.5	2.16993	0.520601	1
hsa_circ_0083228	hsacirc_003109	5.5	2	9	4.5	2.16993	0.520601	1
hsa_circ_0003198	hsacirc_004912	9.91667	15.3333	4.5	0.293478	-1.76867	0.522009	1
hsa_circ_0008339	hsacirc_012144	9.91667	15.3333	4.5	0.293478	-1.76867	0.522009	1
-	hsacirc_008439	9.91667	15.3333	4.5	0.293478	-1.76867	0.522009	1
hsa_circ_0044396	hsacirc_012812	9.91667	15.3333	4.5	0.293478	-1.76867	0.522009	1
hsa_circ_0003183	hsacirc_002471	9.91667	15.3333	4.5	0.293478	-1.76867	0.522009	1
hsa_circ_0001741	hsacirc_013896	95.8333	134.667	57	0.423267	-1.24036	0.52207	1
hsa_circ_0000419	hsacirc_001676	19.1667	11.3333	27	2.38235	1.25239	0.522524	1
hsa_circ_0001329	hsacirc_005182	37.5833	52.6667	22.5	0.427215	-1.22697	0.524123	1
hsa_circ_0003608	hsacirc_005021	5.41667	9.33333	1.5	0.160714	-2.63743	0.524529	1
-	hsacirc_004944	5.41667	9.33333	1.5	0.160714	-2.63743	0.524529	1
-	hsacirc_002795	5.41667	9.33333	1.5	0.160714	-2.63743	0.524529	1
hsa_circ_0079524	hsacirc_013765	5.41667	9.33333	1.5	0.160714	-2.63743	0.524529	1
hsa_circ_0003118	hsacirc_002333	5.41667	9.33333	1.5	0.160714	-2.63743	0.524529	1
hsa_circ_0008207	hsacirc_013908	5.41667	9.33333	1.5	0.160714	-2.63743	0.524529	1
hsa_circ_0006367	hsacirc_007829	5.41667	9.33333	1.5	0.160714	-2.63743	0.524529	1
hsa_circ_0001865	hsacirc_001304	21	30	12	0.4	-1.32193	0.5264	1
-	hsacirc_010260	12	18	6	0.333333	-1.58496	0.526487	1
-	hsacirc_015927	12	18	6	0.333333	-1.58496	0.526487	1
hsa_circ_0008923	hsacirc_014749	12	18	6	0.333333	-1.58496	0.526487	1
hsa_circ_0079521	hsacirc_013630	12	18	6	0.333333	-1.58496	0.526487	1
hsa_circ_0001470	hsacirc_001654	156.667	223.333	90	0.402985	-1.3112	0.528869	1
hsa_circ_0008077	hsacirc_003014	25.5	36	15	0.416667	-1.26303	0.529505	1
hsa_circ_0001178	hsacirc_012042	49.3333	68.6667	30	0.436893	-1.19465	0.529884	1
hsa_circ_0003079	hsacirc_010020	10.1667	5.33333	15	2.8125	1.49185	0.538725	1
hsa_circ_0004420	hsacirc_008499	20.6667	29.3333	12	0.409091	-1.28951	0.538903	1
hsa_circ_0018168	hsacirc_010533	29.5833	18.6667	40.5	2.16964	1.11746	0.540455	1
hsa_circ_0004926	hsacirc_004887	16.1667	23.3333	9	0.385714	-1.3744	0.540942	1
hsa_circ_0005652	hsacirc_008057	14.8333	8.66667	21	2.42308	1.27684	0.543021	1
hsa_circ_0000799	hsacirc_010115	14.8333	8.66667	21	2.42308	1.27684	0.543021	1
hsa_circ_0017160	hsacirc_020160	7.5	12	3	0.25	-2	0.543231	1
hsa_circ_0007249	hsacirc_012671	7.5	12	3	0.25	-2	0.543231	1
hsa_circ_0006848	hsacirc_016094	7.5	12	3	0.25	-2	0.543231	1
hsa_circ_0007221	hsacirc_010938	7.5	12	3	0.25	-2	0.543231	1
hsa_circ_0007827	hsacirc_013976	7.5	12	3	0.25	-2	0.543231	1
hsa_circ_0008664	hsacirc_010270	7.5	12	3	0.25	-2	0.543231	1
hsa_circ_0038074	hsacirc_012046	7.5	12	3	0.25	-2	0.543231	1
hsa_circ_0007134	hsacirc_007961	7.5	12	3	0.25	-2	0.543231	1
hsa_circ_0002190	hsacirc_000021	7.5	12	3	0.25	-2	0.543231	1
hsa_circ_0001722	hsacirc_006849	7.5	12	3	0.25	-2	0.543231	1
-	hsacirc_009125	9.58333	14.6667	4.5	0.306818	-1.70454	0.546524	1
hsa_circ_0080217	hsacirc_009446	9.58333	14.6667	4.5	0.306818	-1.70454	0.546524	1
hsa_circ_0003889	hsacirc_010923	11.6667	17.3333	6	0.346154	-1.53051	0.547322	1
hsa_circ_0001769	hsacirc_015745	11.6667	17.3333	6	0.346154	-1.53051	0.547322	1
hsa_circ_0006602	hsacirc_001306	60.0833	82.6667	37.5	0.453629	-1.14042	0.548693	1
hsa_circ_0005925	hsacirc_020315	55.25	76	34.5	0.453947	-1.1394	0.549161	1
hsa_circ_0006796	hsacirc_001594	13.75	8	19.5	2.4375	1.2854	0.550035	1
hsa_circ_0003915	hsacirc_002714	13.75	8	19.5	2.4375	1.2854	0.550035	1
hsa_circ_0007059	hsacirc_017409	9.08333	4.66667	13.5	2.89286	1.5325	0.551467	1
-	hsacirc_005791	36.25	50	22.5	0.45	-1.152	0.552352	1
hsa_circ_0000130	hsacirc_006116	18.4167	11.3333	25.5	2.25	1.16993	0.554566	1
hsa_circ_0002753	hsacirc_011177	18.4167	11.3333	25.5	2.25	1.16993	0.554566	1
hsa_circ_0004717	hsacirc_017965	15.8333	22.6667	9	0.397059	-1.33258	0.55713	1
hsa_circ_0055904	hsacirc_010792	5.08333	8.66667	1.5	0.173077	-2.53051	0.557295	1
hsa_circ_0003956	hsacirc_004141	5.08333	8.66667	1.5	0.173077	-2.53051	0.557295	1
hsa_circ_0000643	hsacirc_007450	45.25	62	28.5	0.459677	-1.12131	0.558081	1
hsa_circ_0004374	hsacirc_014523	12.6667	7.33333	18	2.45455	1.29546	0.558141	1
hsa_circ_0005044	hsacirc_019193	17.3333	10.6667	24	2.25	1.16993	0.5608	1
hsa_circ_0003718	hsacirc_009928	20	28	12	0.428571	-1.22239	0.565204	1
hsa_circ_0002154	hsacirc_013756	8	4	12	3	1.58496	0.565284	1
hsa_circ_0008281	hsacirc_011962	8	4	12	3	1.58496	0.565284	1
hsa_circ_0003828	hsacirc_004519	8	4	12	3	1.58496	0.565284	1
-	hsacirc_019975	8	4	12	3	1.58496	0.565284	1
hsa_circ_0000119	hsacirc_014284	104.667	143.333	66	0.460465	-1.11884	0.568855	1
hsa_circ_0003633	hsacirc_017157	22.0833	30.6667	13.5	0.440217	-1.18371	0.568973	1
-	hsacirc_017727	2.33333	4.66667	0	0	-Inf	0.568974	1
hsa_circ_0007755	hsacirc_018655	2.33333	4.66667	0	0	-Inf	0.568974	1
hsa_circ_0000131	hsacirc_020198	2.33333	4.66667	0	0	-Inf	0.568974	1
hsa_circ_0014303	hsacirc_001540	2.33333	4.66667	0	0	-Inf	0.568974	1
-	hsacirc_014149	2.33333	4.66667	0	0	-Inf	0.568974	1
hsa_circ_0014737	hsacirc_003618	2.33333	4.66667	0	0	-Inf	0.568974	1
hsa_circ_0015837	hsacirc_011412	2.33333	4.66667	0	0	-Inf	0.568974	1
hsa_circ_0007991	hsacirc_016457	2.33333	4.66667	0	0	-Inf	0.568974	1
hsa_circ_0000184	hsacirc_003227	2.33333	4.66667	0	0	-Inf	0.568974	1
-	hsacirc_017544	2.33333	4.66667	0	0	-Inf	0.568974	1
hsa_circ_0002924	hsacirc_015804	2.33333	4.66667	0	0	-Inf	0.568974	1
hsa_circ_0010906	hsacirc_016394	2.33333	4.66667	0	0	-Inf	0.568974	1
hsa_circ_0000039	hsacirc_009424	2.33333	4.66667	0	0	-Inf	0.568974	1
hsa_circ_0009460	hsacirc_001782	2.33333	4.66667	0	0	-Inf	0.568974	1
hsa_circ_0009463	hsacirc_000672	2.33333	4.66667	0	0	-Inf	0.568974	1
hsa_circ_0012942	hsacirc_012846	2.33333	4.66667	0	0	-Inf	0.568974	1
-	hsacirc_012420	2.33333	4.66667	0	0	-Inf	0.568974	1
hsa_circ_0004224	hsacirc_005173	2.33333	4.66667	0	0	-Inf	0.568974	1
-	hsacirc_001382	2.33333	4.66667	0	0	-Inf	0.568974	1
hsa_circ_0024739	hsacirc_013872	2.33333	4.66667	0	0	-Inf	0.568974	1
hsa_circ_0000288	hsacirc_006416	2.33333	4.66667	0	0	-Inf	0.568974	1
hsa_circ_0020875	hsacirc_013136	2.33333	4.66667	0	0	-Inf	0.568974	1
hsa_circ_0023276	hsacirc_007300	2.33333	4.66667	0	0	-Inf	0.568974	1
hsa_circ_0007506	hsacirc_010989	2.33333	4.66667	0	0	-Inf	0.568974	1
hsa_circ_0005310	hsacirc_020082	2.33333	4.66667	0	0	-Inf	0.568974	1
hsa_circ_0004901	hsacirc_013958	2.33333	4.66667	0	0	-Inf	0.568974	1
hsa_circ_0004361	hsacirc_003405	2.33333	4.66667	0	0	-Inf	0.568974	1
hsa_circ_0003401	hsacirc_014626	2.33333	4.66667	0	0	-Inf	0.568974	1
hsa_circ_0004455	hsacirc_016413	2.33333	4.66667	0	0	-Inf	0.568974	1
hsa_circ_0032689	hsacirc_006714	2.33333	4.66667	0	0	-Inf	0.568974	1
hsa_circ_0032704	hsacirc_020245	2.33333	4.66667	0	0	-Inf	0.568974	1
hsa_circ_0003223	hsacirc_014302	2.33333	4.66667	0	0	-Inf	0.568974	1
hsa_circ_0000651	hsacirc_008193	2.33333	4.66667	0	0	-Inf	0.568974	1
-	hsacirc_001609	2.33333	4.66667	0	0	-Inf	0.568974	1
hsa_circ_0038076	hsacirc_006632	2.33333	4.66667	0	0	-Inf	0.568974	1
-	hsacirc_000031	2.33333	4.66667	0	0	-Inf	0.568974	1
-	hsacirc_000388	2.33333	4.66667	0	0	-Inf	0.568974	1
hsa_circ_0000699	hsacirc_014862	2.33333	4.66667	0	0	-Inf	0.568974	1
hsa_circ_0040002	hsacirc_011362	2.33333	4.66667	0	0	-Inf	0.568974	1
hsa_circ_0004983	hsacirc_019783	2.33333	4.66667	0	0	-Inf	0.568974	1
hsa_circ_0007465	hsacirc_002160	2.33333	4.66667	0	0	-Inf	0.568974	1
hsa_circ_0004566	hsacirc_017480	2.33333	4.66667	0	0	-Inf	0.568974	1
hsa_circ_0007635	hsacirc_016797	2.33333	4.66667	0	0	-Inf	0.568974	1
hsa_circ_0000780	hsacirc_013662	2.33333	4.66667	0	0	-Inf	0.568974	1
hsa_circ_0041638	hsacirc_007078	2.33333	4.66667	0	0	-Inf	0.568974	1
-	hsacirc_014272	2.33333	4.66667	0	0	-Inf	0.568974	1
-	hsacirc_006396	2.33333	4.66667	0	0	-Inf	0.568974	1
hsa_circ_0000819	hsacirc_012127	2.33333	4.66667	0	0	-Inf	0.568974	1
-	hsacirc_001567	2.33333	4.66667	0	0	-Inf	0.568974	1
-	hsacirc_016196	2.33333	4.66667	0	0	-Inf	0.568974	1
hsa_circ_0048492	hsacirc_016199	2.33333	4.66667	0	0	-Inf	0.568974	1
hsa_circ_0005165	hsacirc_016682	2.33333	4.66667	0	0	-Inf	0.568974	1
hsa_circ_0005732	hsacirc_019985	2.33333	4.66667	0	0	-Inf	0.568974	1
hsa_circ_0053378	hsacirc_006770	2.33333	4.66667	0	0	-Inf	0.568974	1
hsa_circ_0004772	hsacirc_017773	2.33333	4.66667	0	0	-Inf	0.568974	1
hsa_circ_0003497	hsacirc_000282	2.33333	4.66667	0	0	-Inf	0.568974	1
hsa_circ_0008059	hsacirc_007325	2.33333	4.66667	0	0	-Inf	0.568974	1
-	hsacirc_004793	2.33333	4.66667	0	0	-Inf	0.568974	1
-	hsacirc_002941	2.33333	4.66667	0	0	-Inf	0.568974	1
hsa_circ_0004468	hsacirc_005345	2.33333	4.66667	0	0	-Inf	0.568974	1
hsa_circ_0009099	hsacirc_011184	2.33333	4.66667	0	0	-Inf	0.568974	1
hsa_circ_0005163	hsacirc_011156	2.33333	4.66667	0	0	-Inf	0.568974	1
hsa_circ_0001191	hsacirc_009684	2.33333	4.66667	0	0	-Inf	0.568974	1
hsa_circ_0066814	hsacirc_010603	2.33333	4.66667	0	0	-Inf	0.568974	1
-	hsacirc_011392	2.33333	4.66667	0	0	-Inf	0.568974	1
hsa_circ_0067450	hsacirc_010434	2.33333	4.66667	0	0	-Inf	0.568974	1
hsa_circ_0068173	hsacirc_000718	2.33333	4.66667	0	0	-Inf	0.568974	1
hsa_circ_0003036	hsacirc_006681	2.33333	4.66667	0	0	-Inf	0.568974	1
hsa_circ_0007485	hsacirc_007825	2.33333	4.66667	0	0	-Inf	0.568974	1
hsa_circ_0066151	hsacirc_008653	2.33333	4.66667	0	0	-Inf	0.568974	1
-	hsacirc_003077	2.33333	4.66667	0	0	-Inf	0.568974	1
-	hsacirc_018742	2.33333	4.66667	0	0	-Inf	0.568974	1
hsa_circ_0006473	hsacirc_002222	2.33333	4.66667	0	0	-Inf	0.568974	1
hsa_circ_0008460	hsacirc_006028	2.33333	4.66667	0	0	-Inf	0.568974	1
hsa_circ_0069399	hsacirc_002753	2.33333	4.66667	0	0	-Inf	0.568974	1
hsa_circ_0002021	hsacirc_006273	2.33333	4.66667	0	0	-Inf	0.568974	1
hsa_circ_0003148	hsacirc_002044	2.33333	4.66667	0	0	-Inf	0.568974	1
hsa_circ_0001540	hsacirc_006329	2.33333	4.66667	0	0	-Inf	0.568974	1
hsa_circ_0075298	hsacirc_019210	2.33333	4.66667	0	0	-Inf	0.568974	1
-	hsacirc_001086	2.33333	4.66667	0	0	-Inf	0.568974	1
hsa_circ_0072697	hsacirc_020178	2.33333	4.66667	0	0	-Inf	0.568974	1
hsa_circ_0077817	hsacirc_007377	2.33333	4.66667	0	0	-Inf	0.568974	1
-	hsacirc_010998	2.33333	4.66667	0	0	-Inf	0.568974	1
-	hsacirc_005787	2.33333	4.66667	0	0	-Inf	0.568974	1
hsa_circ_0078218	hsacirc_009607	2.33333	4.66667	0	0	-Inf	0.568974	1
hsa_circ_0075456	hsacirc_015484	2.33333	4.66667	0	0	-Inf	0.568974	1
-	hsacirc_004848	2.33333	4.66667	0	0	-Inf	0.568974	1
-	hsacirc_009408	2.33333	4.66667	0	0	-Inf	0.568974	1
-	hsacirc_005490	2.33333	4.66667	0	0	-Inf	0.568974	1
hsa_circ_0007823	hsacirc_010662	2.33333	4.66667	0	0	-Inf	0.568974	1
hsa_circ_0006041	hsacirc_017663	2.33333	4.66667	0	0	-Inf	0.568974	1
-	hsacirc_007901	2.33333	4.66667	0	0	-Inf	0.568974	1
-	hsacirc_016318	2.33333	4.66667	0	0	-Inf	0.568974	1
-	hsacirc_003307	2.33333	4.66667	0	0	-Inf	0.568974	1
-	hsacirc_009108	2.33333	4.66667	0	0	-Inf	0.568974	1
hsa_circ_0008592	hsacirc_003301	2.33333	4.66667	0	0	-Inf	0.568974	1
hsa_circ_0084135	hsacirc_005032	2.33333	4.66667	0	0	-Inf	0.568974	1
-	hsacirc_019475	2.33333	4.66667	0	0	-Inf	0.568974	1
hsa_circ_0002946	hsacirc_004632	2.33333	4.66667	0	0	-Inf	0.568974	1
hsa_circ_0087749	hsacirc_001213	2.33333	4.66667	0	0	-Inf	0.568974	1
-	hsacirc_008216	2.33333	4.66667	0	0	-Inf	0.568974	1
-	hsacirc_006276	2.33333	4.66667	0	0	-Inf	0.568974	1
-	hsacirc_007732	2.33333	4.66667	0	0	-Inf	0.568974	1
-	hsacirc_012106	2.33333	4.66667	0	0	-Inf	0.568974	1
hsa_circ_0086190	hsacirc_006810	2.33333	4.66667	0	0	-Inf	0.568974	1
-	hsacirc_013156	2.33333	4.66667	0	0	-Inf	0.568974	1
hsa_circ_0006648	hsacirc_000493	2.33333	4.66667	0	0	-Inf	0.568974	1
hsa_circ_0009037	hsacirc_001839	2.33333	4.66667	0	0	-Inf	0.568974	1
hsa_circ_0001917	hsacirc_000922	2.33333	4.66667	0	0	-Inf	0.568974	1
hsa_circ_0009069	hsacirc_015180	2.33333	4.66667	0	0	-Inf	0.568974	1
hsa_circ_0091175	hsacirc_016458	2.33333	4.66667	0	0	-Inf	0.568974	1
hsa_circ_0001236	hsacirc_019147	11.3333	16.6667	6	0.36	-1.47393	0.569335	1
hsa_circ_0001564	hsacirc_010212	11.3333	16.6667	6	0.36	-1.47393	0.569335	1
hsa_circ_0000816	hsacirc_019506	44.5833	60.6667	28.5	0.46978	-1.08994	0.570086	1
hsa_circ_0005782	hsacirc_008571	7.16667	11.3333	3	0.264706	-1.91754	0.572519	1
hsa_circ_0010491	hsacirc_000413	7.16667	11.3333	3	0.264706	-1.91754	0.572519	1
hsa_circ_0009461	hsacirc_008204	7.16667	11.3333	3	0.264706	-1.91754	0.572519	1
hsa_circ_0007458	hsacirc_017364	7.16667	11.3333	3	0.264706	-1.91754	0.572519	1
hsa_circ_0008445	hsacirc_009873	7.16667	11.3333	3	0.264706	-1.91754	0.572519	1
hsa_circ_0003620	hsacirc_015165	7.16667	11.3333	3	0.264706	-1.91754	0.572519	1
hsa_circ_0004872	hsacirc_006763	7.16667	11.3333	3	0.264706	-1.91754	0.572519	1
hsa_circ_0069101	hsacirc_016279	7.16667	11.3333	3	0.264706	-1.91754	0.572519	1
hsa_circ_0006543	hsacirc_009935	7.16667	11.3333	3	0.264706	-1.91754	0.572519	1
hsa_circ_0001487	hsacirc_011369	7.16667	11.3333	3	0.264706	-1.91754	0.572519	1
-	hsacirc_007024	7.16667	11.3333	3	0.264706	-1.91754	0.572519	1
-	hsacirc_014013	7.16667	11.3333	3	0.264706	-1.91754	0.572519	1
hsa_circ_0002484	hsacirc_004013	42.1667	57.3333	27	0.47093	-1.08641	0.572564	1
hsa_circ_0075533	hsacirc_005648	24.1667	33.3333	15	0.45	-1.152	0.57273	1
hsa_circ_0008870	hsacirc_008422	15.5	22	9	0.409091	-1.28951	0.573968	1
hsa_circ_0004516	hsacirc_006263	15.1667	9.33333	21	2.25	1.16993	0.575805	1
hsa_circ_0008494	hsacirc_014711	76.6667	51.3333	102	1.98701	0.990601	0.578433	1
hsa_circ_0029693	hsacirc_000846	6.91667	3.33333	10.5	3.15	1.65535	0.579545	1
hsa_circ_0032406	hsacirc_008488	6.91667	3.33333	10.5	3.15	1.65535	0.579545	1
hsa_circ_0002702	hsacirc_014047	6.91667	3.33333	10.5	3.15	1.65535	0.579545	1
hsa_circ_0005320	hsacirc_015616	50.8333	68.6667	33	0.480583	-1.05714	0.580604	1
hsa_circ_0003653	hsacirc_013144	10.5	6	15	2.5	1.32193	0.581982	1
hsa_circ_0001195	hsacirc_011154	10.5	6	15	2.5	1.32193	0.581982	1
hsa_circ_0079619	hsacirc_016815	14.0833	8.66667	19.5	2.25	1.16993	0.584856	1
hsa_circ_0007386	hsacirc_011657	46	62	30	0.483871	-1.04731	0.585696	1
hsa_circ_0004004	hsacirc_018451	34.5833	46.6667	22.5	0.482143	-1.05247	0.591083	1
-	hsacirc_019876	4.75	8	1.5	0.1875	-2.41504	0.591285	1
hsa_circ_0007895	hsacirc_005524	4.75	8	1.5	0.1875	-2.41504	0.591285	1
hsa_circ_0013232	hsacirc_010082	4.75	8	1.5	0.1875	-2.41504	0.591285	1
hsa_circ_0003839	hsacirc_016906	4.75	8	1.5	0.1875	-2.41504	0.591285	1
hsa_circ_0005257	hsacirc_015372	4.75	8	1.5	0.1875	-2.41504	0.591285	1
hsa_circ_0067918	hsacirc_004530	4.75	8	1.5	0.1875	-2.41504	0.591285	1
hsa_circ_0069338	hsacirc_019340	4.75	8	1.5	0.1875	-2.41504	0.591285	1
hsa_circ_0006836	hsacirc_004529	15.1667	21.3333	9	0.421875	-1.24511	0.591484	1
hsa_circ_0005362	hsacirc_011695	15.1667	21.3333	9	0.421875	-1.24511	0.591484	1
hsa_circ_0004321	hsacirc_015976	11	16	6	0.375	-1.41504	0.592544	1
hsa_circ_0006459	hsacirc_004001	19.3333	26.6667	12	0.45	-1.152	0.593338	1
hsa_circ_0014086	hsacirc_011258	2.58333	0.666667	4.5	6.75	2.75489	0.593691	1
-	hsacirc_002773	2.58333	0.666667	4.5	6.75	2.75489	0.593691	1
hsa_circ_0007950	hsacirc_020281	2.58333	0.666667	4.5	6.75	2.75489	0.593691	1
hsa_circ_0019697	hsacirc_017185	2.58333	0.666667	4.5	6.75	2.75489	0.593691	1
-	hsacirc_004983	2.58333	0.666667	4.5	6.75	2.75489	0.593691	1
hsa_circ_0031241	hsacirc_001049	2.58333	0.666667	4.5	6.75	2.75489	0.593691	1
hsa_circ_0031749	hsacirc_015755	2.58333	0.666667	4.5	6.75	2.75489	0.593691	1
-	hsacirc_016304	2.58333	0.666667	4.5	6.75	2.75489	0.593691	1
hsa_circ_0002867	hsacirc_013636	2.58333	0.666667	4.5	6.75	2.75489	0.593691	1
hsa_circ_0003288	hsacirc_013168	2.58333	0.666667	4.5	6.75	2.75489	0.593691	1
-	hsacirc_015576	2.58333	0.666667	4.5	6.75	2.75489	0.593691	1
hsa_circ_0005028	hsacirc_007057	2.58333	0.666667	4.5	6.75	2.75489	0.593691	1
hsa_circ_0001380	hsacirc_009895	2.58333	0.666667	4.5	6.75	2.75489	0.593691	1
hsa_circ_0008196	hsacirc_003337	2.58333	0.666667	4.5	6.75	2.75489	0.593691	1
hsa_circ_0077888	hsacirc_007598	2.58333	0.666667	4.5	6.75	2.75489	0.593691	1
hsa_circ_0076178	hsacirc_007660	2.58333	0.666667	4.5	6.75	2.75489	0.593691	1
-	hsacirc_015691	2.58333	0.666667	4.5	6.75	2.75489	0.593691	1
-	hsacirc_002914	2.58333	0.666667	4.5	6.75	2.75489	0.593691	1
hsa_circ_0002868	hsacirc_005399	5.83333	2.66667	9	3.375	1.75489	0.593976	1
-	hsacirc_000887	5.83333	2.66667	9	3.375	1.75489	0.593976	1
hsa_circ_0012982	hsacirc_010314	5.83333	2.66667	9	3.375	1.75489	0.593976	1
-	hsacirc_006873	5.83333	2.66667	9	3.375	1.75489	0.593976	1
hsa_circ_0007843	hsacirc_008462	5.83333	2.66667	9	3.375	1.75489	0.593976	1
hsa_circ_0023554	hsacirc_011393	5.83333	2.66667	9	3.375	1.75489	0.593976	1
hsa_circ_0004767	hsacirc_008495	5.83333	2.66667	9	3.375	1.75489	0.593976	1
hsa_circ_0000776	hsacirc_014300	5.83333	2.66667	9	3.375	1.75489	0.593976	1
hsa_circ_0008677	hsacirc_002943	5.83333	2.66667	9	3.375	1.75489	0.593976	1
hsa_circ_0056470	hsacirc_017741	5.83333	2.66667	9	3.375	1.75489	0.593976	1
hsa_circ_0006832	hsacirc_002262	5.83333	2.66667	9	3.375	1.75489	0.593976	1
-	hsacirc_004638	5.83333	2.66667	9	3.375	1.75489	0.593976	1
hsa_circ_0005954	hsacirc_015341	5.83333	2.66667	9	3.375	1.75489	0.593976	1
-	hsacirc_009675	5.83333	2.66667	9	3.375	1.75489	0.593976	1
-	hsacirc_012716	5.83333	2.66667	9	3.375	1.75489	0.593976	1
-	hsacirc_014246	5.83333	2.66667	9	3.375	1.75489	0.593976	1
hsa_circ_0091113	hsacirc_004541	5.83333	2.66667	9	3.375	1.75489	0.593976	1
hsa_circ_0019079	hsacirc_005859	21.4167	29.3333	13.5	0.460227	-1.11958	0.594676	1
hsa_circ_0002490	hsacirc_001401	21.4167	29.3333	13.5	0.460227	-1.11958	0.594676	1
hsa_circ_0001875	hsacirc_020299	21.4167	29.3333	13.5	0.460227	-1.11958	0.594676	1
hsa_circ_0001324	hsacirc_007897	23.5	32	15	0.46875	-1.09311	0.596337	1
-	hsacirc_013545	49.8333	66.6667	33	0.495	-1.0145	0.597174	1
hsa_circ_0009175	hsacirc_012224	25.5833	34.6667	16.5	0.475962	-1.07108	0.598301	1
hsa_circ_0004365	hsacirc_015664	25.5833	34.6667	16.5	0.475962	-1.07108	0.598301	1
hsa_circ_0017348	hsacirc_013306	9.41667	5.33333	13.5	2.53125	1.33985	0.598309	1
hsa_circ_0004116	hsacirc_011397	9.41667	5.33333	13.5	2.53125	1.33985	0.598309	1
hsa_circ_0002897	hsacirc_019498	8.91667	13.3333	4.5	0.3375	-1.56704	0.599136	1
hsa_circ_0007958	hsacirc_010108	8.91667	13.3333	4.5	0.3375	-1.56704	0.599136	1
hsa_circ_0023942	hsacirc_002036	51.9167	69.3333	34.5	0.497596	-1.00695	0.599678	1
hsa_circ_0001756	hsacirc_001596	20.1667	13.3333	27	2.025	1.01792	0.600457	1
-	hsacirc_015204	3.66667	1.33333	6	4.5	2.16993	0.600621	1
hsa_circ_0004222	hsacirc_004581	3.66667	1.33333	6	4.5	2.16993	0.600621	1
hsa_circ_0000154	hsacirc_005802	3.66667	1.33333	6	4.5	2.16993	0.600621	1
hsa_circ_0002491	hsacirc_020053	3.66667	1.33333	6	4.5	2.16993	0.600621	1
hsa_circ_0000027	hsacirc_016685	3.66667	1.33333	6	4.5	2.16993	0.600621	1
hsa_circ_0006636	hsacirc_001113	3.66667	1.33333	6	4.5	2.16993	0.600621	1
hsa_circ_0020050	hsacirc_002013	3.66667	1.33333	6	4.5	2.16993	0.600621	1
hsa_circ_0017731	hsacirc_019308	3.66667	1.33333	6	4.5	2.16993	0.600621	1
hsa_circ_0002282	hsacirc_010929	3.66667	1.33333	6	4.5	2.16993	0.600621	1
-	hsacirc_001198	3.66667	1.33333	6	4.5	2.16993	0.600621	1
-	hsacirc_001362	3.66667	1.33333	6	4.5	2.16993	0.600621	1
-	hsacirc_017490	3.66667	1.33333	6	4.5	2.16993	0.600621	1
hsa_circ_0031250	hsacirc_009709	3.66667	1.33333	6	4.5	2.16993	0.600621	1
hsa_circ_0002301	hsacirc_004459	3.66667	1.33333	6	4.5	2.16993	0.600621	1
hsa_circ_0002395	hsacirc_002427	3.66667	1.33333	6	4.5	2.16993	0.600621	1
hsa_circ_0001979	hsacirc_003181	3.66667	1.33333	6	4.5	2.16993	0.600621	1
hsa_circ_0005301	hsacirc_009086	3.66667	1.33333	6	4.5	2.16993	0.600621	1
hsa_circ_0000631	hsacirc_017144	3.66667	1.33333	6	4.5	2.16993	0.600621	1
hsa_circ_0036624	hsacirc_013722	3.66667	1.33333	6	4.5	2.16993	0.600621	1
-	hsacirc_009225	3.66667	1.33333	6	4.5	2.16993	0.600621	1
hsa_circ_0038072	hsacirc_007452	3.66667	1.33333	6	4.5	2.16993	0.600621	1
hsa_circ_0038704	hsacirc_001941	3.66667	1.33333	6	4.5	2.16993	0.600621	1
hsa_circ_0037558	hsacirc_012139	3.66667	1.33333	6	4.5	2.16993	0.600621	1
-	hsacirc_001334	3.66667	1.33333	6	4.5	2.16993	0.600621	1
hsa_circ_0000813	hsacirc_013832	3.66667	1.33333	6	4.5	2.16993	0.600621	1
hsa_circ_0046941	hsacirc_019100	3.66667	1.33333	6	4.5	2.16993	0.600621	1
hsa_circ_0047972	hsacirc_001504	3.66667	1.33333	6	4.5	2.16993	0.600621	1
hsa_circ_0007144	hsacirc_003694	3.66667	1.33333	6	4.5	2.16993	0.600621	1
-	hsacirc_003061	3.66667	1.33333	6	4.5	2.16993	0.600621	1
hsa_circ_0004827	hsacirc_018061	3.66667	1.33333	6	4.5	2.16993	0.600621	1
hsa_circ_0058518	hsacirc_015055	3.66667	1.33333	6	4.5	2.16993	0.600621	1
hsa_circ_0061395	hsacirc_015093	3.66667	1.33333	6	4.5	2.16993	0.600621	1
hsa_circ_0008795	hsacirc_012041	3.66667	1.33333	6	4.5	2.16993	0.600621	1
hsa_circ_0062169	hsacirc_012795	3.66667	1.33333	6	4.5	2.16993	0.600621	1
hsa_circ_0068702	hsacirc_011016	3.66667	1.33333	6	4.5	2.16993	0.600621	1
hsa_circ_0065034	hsacirc_010990	3.66667	1.33333	6	4.5	2.16993	0.600621	1
hsa_circ_0065284	hsacirc_017974	3.66667	1.33333	6	4.5	2.16993	0.600621	1
hsa_circ_0001461	hsacirc_014579	3.66667	1.33333	6	4.5	2.16993	0.600621	1
-	hsacirc_018841	3.66667	1.33333	6	4.5	2.16993	0.600621	1
hsa_circ_0071845	hsacirc_018419	3.66667	1.33333	6	4.5	2.16993	0.600621	1
-	hsacirc_019217	3.66667	1.33333	6	4.5	2.16993	0.600621	1
hsa_circ_0074389	hsacirc_017191	3.66667	1.33333	6	4.5	2.16993	0.600621	1
-	hsacirc_005368	3.66667	1.33333	6	4.5	2.16993	0.600621	1
-	hsacirc_010600	3.66667	1.33333	6	4.5	2.16993	0.600621	1
hsa_circ_0001638	hsacirc_010246	3.66667	1.33333	6	4.5	2.16993	0.600621	1
hsa_circ_0081851	hsacirc_005704	3.66667	1.33333	6	4.5	2.16993	0.600621	1
-	hsacirc_000939	3.66667	1.33333	6	4.5	2.16993	0.600621	1
-	hsacirc_008183	3.66667	1.33333	6	4.5	2.16993	0.600621	1
hsa_circ_0084947	hsacirc_012321	3.66667	1.33333	6	4.5	2.16993	0.600621	1
-	hsacirc_005619	3.66667	1.33333	6	4.5	2.16993	0.600621	1
-	hsacirc_017322	3.66667	1.33333	6	4.5	2.16993	0.600621	1
-	hsacirc_017868	3.66667	1.33333	6	4.5	2.16993	0.600621	1
hsa_circ_0091360	hsacirc_007532	3.66667	1.33333	6	4.5	2.16993	0.600621	1
hsa_circ_0004666	hsacirc_011762	3.66667	1.33333	6	4.5	2.16993	0.600621	1
hsa_circ_0011542	hsacirc_008270	6.83333	10.6667	3	0.28125	-1.83007	0.603211	1
hsa_circ_0031977	hsacirc_004991	6.83333	10.6667	3	0.28125	-1.83007	0.603211	1
hsa_circ_0034972	hsacirc_001025	6.83333	10.6667	3	0.28125	-1.83007	0.603211	1
hsa_circ_0055055	hsacirc_014668	6.83333	10.6667	3	0.28125	-1.83007	0.603211	1
hsa_circ_0001158	hsacirc_003345	6.83333	10.6667	3	0.28125	-1.83007	0.603211	1
hsa_circ_0002211	hsacirc_004052	6.83333	10.6667	3	0.28125	-1.83007	0.603211	1
hsa_circ_0002260	hsacirc_014721	6.83333	10.6667	3	0.28125	-1.83007	0.603211	1
hsa_circ_0004368	hsacirc_007037	6.83333	10.6667	3	0.28125	-1.83007	0.603211	1
hsa_circ_0005707	hsacirc_000752	6.83333	10.6667	3	0.28125	-1.83007	0.603211	1
hsa_circ_0000118	hsacirc_003880	178.917	245.333	112.5	0.45856	-1.12482	0.603234	1
hsa_circ_0000854	hsacirc_000561	4.75	2	7.5	3.75	1.90689	0.603495	1
hsa_circ_0001173	hsacirc_009458	56.0833	74.6667	37.5	0.502232	-0.993574	0.604381	1
hsa_circ_0004968	hsacirc_013596	11.9167	7.33333	16.5	2.25	1.16993	0.607657	1
-	hsacirc_012292	21.0833	28.6667	13.5	0.47093	-1.08641	0.608151	1
hsa_circ_0007218	hsacirc_018603	19.0833	12.6667	25.5	2.01316	1.00946	0.608388	1
hsa_circ_0003496	hsacirc_010889	36	48	24	0.5	-1	0.609864	1
hsa_circ_0005379	hsacirc_017672	12.75	18	7.5	0.416667	-1.26303	0.611362	1
hsa_circ_0006479	hsacirc_014989	8.33333	4.66667	12	2.57143	1.36257	0.616588	1
hsa_circ_0014613	hsacirc_008920	10.6667	15.3333	6	0.391304	-1.35364	0.616964	1
hsa_circ_0002755	hsacirc_014352	10.6667	15.3333	6	0.391304	-1.35364	0.616964	1
hsa_circ_0088602	hsacirc_005646	10.6667	15.3333	6	0.391304	-1.35364	0.616964	1
hsa_circ_0087357	hsacirc_012435	10.6667	15.3333	6	0.391304	-1.35364	0.616964	1
hsa_circ_0009154	hsacirc_016092	21.5833	14.6667	28.5	1.94318	0.958421	0.617206	1
hsa_circ_0000418	hsacirc_001592	18	12	24	2	1	0.617291	1
hsa_circ_0000471	hsacirc_006017	42.75	30	55.5	1.85	0.887525	0.617444	1
hsa_circ_0003458	hsacirc_003924	14.4167	9.33333	19.5	2.08929	1.06301	0.618573	1
hsa_circ_0001181	hsacirc_003716	28.75	20	37.5	1.875	0.906891	0.620511	1
hsa_circ_0000705	hsacirc_010215	24.9167	33.3333	16.5	0.495	-1.0145	0.621347	1
hsa_circ_0006135	hsacirc_000679	22.8333	30.6667	15	0.48913	-1.03171	0.621395	1
hsa_circ_0003664	hsacirc_004976	20.75	28	13.5	0.482143	-1.05247	0.622062	1
hsa_circ_0008774	hsacirc_005701	4.41667	7.33333	1.5	0.204545	-2.28951	0.627172	1
hsa_circ_0006272	hsacirc_018193	4.41667	7.33333	1.5	0.204545	-2.28951	0.627172	1
hsa_circ_0030369	hsacirc_012384	4.41667	7.33333	1.5	0.204545	-2.28951	0.627172	1
hsa_circ_0007637	hsacirc_018474	4.41667	7.33333	1.5	0.204545	-2.28951	0.627172	1
hsa_circ_0003273	hsacirc_005977	4.41667	7.33333	1.5	0.204545	-2.28951	0.627172	1
hsa_circ_0007641	hsacirc_006532	4.41667	7.33333	1.5	0.204545	-2.28951	0.627172	1
hsa_circ_0001148	hsacirc_002506	4.41667	7.33333	1.5	0.204545	-2.28951	0.627172	1
hsa_circ_0066290	hsacirc_014956	4.41667	7.33333	1.5	0.204545	-2.28951	0.627172	1
hsa_circ_0007308	hsacirc_010335	4.41667	7.33333	1.5	0.204545	-2.28951	0.627172	1
hsa_circ_0004999	hsacirc_009040	4.41667	7.33333	1.5	0.204545	-2.28951	0.627172	1
hsa_circ_0083443	hsacirc_009030	4.41667	7.33333	1.5	0.204545	-2.28951	0.627172	1
hsa_circ_0000008	hsacirc_002794	8.58333	12.6667	4.5	0.355263	-1.49304	0.627409	1
-	hsacirc_010332	8.58333	12.6667	4.5	0.355263	-1.49304	0.627409	1
hsa_circ_0004432	hsacirc_001913	8.58333	12.6667	4.5	0.355263	-1.49304	0.627409	1
hsa_circ_0004188	hsacirc_015401	8.58333	12.6667	4.5	0.355263	-1.49304	0.627409	1
hsa_circ_0003162	hsacirc_012169	8.58333	12.6667	4.5	0.355263	-1.49304	0.627409	1
hsa_circ_0005499	hsacirc_004443	13.3333	8.66667	18	2.07692	1.05445	0.631052	1
hsa_circ_0001383	hsacirc_003064	12.4167	17.3333	7.5	0.432692	-1.20859	0.632943	1
hsa_circ_0001895	hsacirc_015630	12.4167	17.3333	7.5	0.432692	-1.20859	0.632943	1
-	hsacirc_016418	2	4	0	0	-Inf	0.635054	1
-	hsacirc_009727	2	4	0	0	-Inf	0.635054	1
hsa_circ_0000107	hsacirc_008945	2	4	0	0	-Inf	0.635054	1
hsa_circ_0013734	hsacirc_014451	2	4	0	0	-Inf	0.635054	1
-	hsacirc_000381	2	4	0	0	-Inf	0.635054	1
hsa_circ_0014375	hsacirc_018249	2	4	0	0	-Inf	0.635054	1
hsa_circ_0014632	hsacirc_017774	2	4	0	0	-Inf	0.635054	1
-	hsacirc_006473	2	4	0	0	-Inf	0.635054	1
hsa_circ_0010109	hsacirc_014978	2	4	0	0	-Inf	0.635054	1
hsa_circ_0010146	hsacirc_018364	2	4	0	0	-Inf	0.635054	1
-	hsacirc_009763	2	4	0	0	-Inf	0.635054	1
-	hsacirc_002093	2	4	0	0	-Inf	0.635054	1
-	hsacirc_003695	2	4	0	0	-Inf	0.635054	1
-	hsacirc_010947	2	4	0	0	-Inf	0.635054	1
hsa_circ_0005907	hsacirc_020264	2	4	0	0	-Inf	0.635054	1
-	hsacirc_015873	2	4	0	0	-Inf	0.635054	1
-	hsacirc_000499	2	4	0	0	-Inf	0.635054	1
hsa_circ_0015928	hsacirc_009384	2	4	0	0	-Inf	0.635054	1
hsa_circ_0000179	hsacirc_011857	2	4	0	0	-Inf	0.635054	1
-	hsacirc_018560	2	4	0	0	-Inf	0.635054	1
-	hsacirc_017791	2	4	0	0	-Inf	0.635054	1
hsa_circ_0003553	hsacirc_015098	2	4	0	0	-Inf	0.635054	1
-	hsacirc_001589	2	4	0	0	-Inf	0.635054	1
-	hsacirc_020217	2	4	0	0	-Inf	0.635054	1
-	hsacirc_009989	2	4	0	0	-Inf	0.635054	1
-	hsacirc_010135	2	4	0	0	-Inf	0.635054	1
-	hsacirc_014415	2	4	0	0	-Inf	0.635054	1
hsa_circ_0005788	hsacirc_011909	2	4	0	0	-Inf	0.635054	1
hsa_circ_0012671	hsacirc_009822	2	4	0	0	-Inf	0.635054	1
-	hsacirc_002057	2	4	0	0	-Inf	0.635054	1
hsa_circ_0006633	hsacirc_016164	2	4	0	0	-Inf	0.635054	1
hsa_circ_0013199	hsacirc_014465	2	4	0	0	-Inf	0.635054	1
-	hsacirc_000522	2	4	0	0	-Inf	0.635054	1
hsa_circ_0020092	hsacirc_012985	2	4	0	0	-Inf	0.635054	1
hsa_circ_0003419	hsacirc_012678	2	4	0	0	-Inf	0.635054	1
hsa_circ_0003766	hsacirc_017689	2	4	0	0	-Inf	0.635054	1
hsa_circ_0005144	hsacirc_007967	2	4	0	0	-Inf	0.635054	1
-	hsacirc_009066	2	4	0	0	-Inf	0.635054	1
hsa_circ_0018553	hsacirc_013046	2	4	0	0	-Inf	0.635054	1
-	hsacirc_018654	2	4	0	0	-Inf	0.635054	1
hsa_circ_0002758	hsacirc_013624	2	4	0	0	-Inf	0.635054	1
-	hsacirc_008032	2	4	0	0	-Inf	0.635054	1
-	hsacirc_004120	2	4	0	0	-Inf	0.635054	1
-	hsacirc_010815	2	4	0	0	-Inf	0.635054	1
hsa_circ_0003541	hsacirc_018872	2	4	0	0	-Inf	0.635054	1
hsa_circ_0024444	hsacirc_013391	2	4	0	0	-Inf	0.635054	1
hsa_circ_0024737	hsacirc_009600	2	4	0	0	-Inf	0.635054	1
hsa_circ_0021312	hsacirc_001325	2	4	0	0	-Inf	0.635054	1
hsa_circ_0003234	hsacirc_013749	2	4	0	0	-Inf	0.635054	1
hsa_circ_0007985	hsacirc_015880	2	4	0	0	-Inf	0.635054	1
-	hsacirc_007304	2	4	0	0	-Inf	0.635054	1
-	hsacirc_005357	2	4	0	0	-Inf	0.635054	1
hsa_circ_0003744	hsacirc_018350	2	4	0	0	-Inf	0.635054	1
hsa_circ_0008992	hsacirc_008141	2	4	0	0	-Inf	0.635054	1
hsa_circ_0023783	hsacirc_013755	2	4	0	0	-Inf	0.635054	1
hsa_circ_0003695	hsacirc_006564	2	4	0	0	-Inf	0.635054	1
-	hsacirc_006117	2	4	0	0	-Inf	0.635054	1
hsa_circ_0024037	hsacirc_006466	2	4	0	0	-Inf	0.635054	1
-	hsacirc_019721	2	4	0	0	-Inf	0.635054	1
hsa_circ_0007885	hsacirc_017876	2	4	0	0	-Inf	0.635054	1
-	hsacirc_010739	2	4	0	0	-Inf	0.635054	1
hsa_circ_0029318	hsacirc_013430	2	4	0	0	-Inf	0.635054	1
-	hsacirc_017970	2	4	0	0	-Inf	0.635054	1
hsa_circ_0000386	hsacirc_016842	2	4	0	0	-Inf	0.635054	1
-	hsacirc_018926	2	4	0	0	-Inf	0.635054	1
hsa_circ_0003770	hsacirc_002109	2	4	0	0	-Inf	0.635054	1
hsa_circ_0026238	hsacirc_007728	2	4	0	0	-Inf	0.635054	1
-	hsacirc_006255	2	4	0	0	-Inf	0.635054	1
hsa_circ_0027547	hsacirc_006201	2	4	0	0	-Inf	0.635054	1
hsa_circ_0003251	hsacirc_012000	2	4	0	0	-Inf	0.635054	1
hsa_circ_0007621	hsacirc_010359	2	4	0	0	-Inf	0.635054	1
-	hsacirc_013760	2	4	0	0	-Inf	0.635054	1
-	hsacirc_003107	2	4	0	0	-Inf	0.635054	1
hsa_circ_0030763	hsacirc_004789	2	4	0	0	-Inf	0.635054	1
hsa_circ_0003040	hsacirc_000890	2	4	0	0	-Inf	0.635054	1
-	hsacirc_002742	2	4	0	0	-Inf	0.635054	1
-	hsacirc_007515	2	4	0	0	-Inf	0.635054	1
hsa_circ_0030372	hsacirc_017994	2	4	0	0	-Inf	0.635054	1
hsa_circ_0030533	hsacirc_019437	2	4	0	0	-Inf	0.635054	1
hsa_circ_0007470	hsacirc_011163	2	4	0	0	-Inf	0.635054	1
hsa_circ_0004766	hsacirc_018226	2	4	0	0	-Inf	0.635054	1
hsa_circ_0007656	hsacirc_009409	2	4	0	0	-Inf	0.635054	1
-	hsacirc_007115	2	4	0	0	-Inf	0.635054	1
-	hsacirc_015020	2	4	0	0	-Inf	0.635054	1
hsa_circ_0034927	hsacirc_016698	2	4	0	0	-Inf	0.635054	1
-	hsacirc_000353	2	4	0	0	-Inf	0.635054	1
-	hsacirc_007491	2	4	0	0	-Inf	0.635054	1
hsa_circ_0035191	hsacirc_000633	2	4	0	0	-Inf	0.635054	1
hsa_circ_0003501	hsacirc_012260	2	4	0	0	-Inf	0.635054	1
hsa_circ_0035529	hsacirc_005434	2	4	0	0	-Inf	0.635054	1
hsa_circ_0007152	hsacirc_012727	2	4	0	0	-Inf	0.635054	1
hsa_circ_0036294	hsacirc_015891	2	4	0	0	-Inf	0.635054	1
-	hsacirc_014815	2	4	0	0	-Inf	0.635054	1
hsa_circ_0000639	hsacirc_006125	2	4	0	0	-Inf	0.635054	1
hsa_circ_0005745	hsacirc_018467	2	4	0	0	-Inf	0.635054	1
-	hsacirc_006442	2	4	0	0	-Inf	0.635054	1
-	hsacirc_013198	2	4	0	0	-Inf	0.635054	1
-	hsacirc_016208	2	4	0	0	-Inf	0.635054	1
hsa_circ_0009045	hsacirc_008219	2	4	0	0	-Inf	0.635054	1
-	hsacirc_011774	2	4	0	0	-Inf	0.635054	1
hsa_circ_0004833	hsacirc_002855	2	4	0	0	-Inf	0.635054	1
-	hsacirc_004649	2	4	0	0	-Inf	0.635054	1
-	hsacirc_002468	2	4	0	0	-Inf	0.635054	1
hsa_circ_0037650	hsacirc_005568	2	4	0	0	-Inf	0.635054	1
hsa_circ_0005813	hsacirc_016181	2	4	0	0	-Inf	0.635054	1
hsa_circ_0006982	hsacirc_009752	2	4	0	0	-Inf	0.635054	1
-	hsacirc_000087	2	4	0	0	-Inf	0.635054	1
-	hsacirc_013657	2	4	0	0	-Inf	0.635054	1
-	hsacirc_004047	2	4	0	0	-Inf	0.635054	1
hsa_circ_0040784	hsacirc_017227	2	4	0	0	-Inf	0.635054	1
hsa_circ_0041050	hsacirc_007004	2	4	0	0	-Inf	0.635054	1
hsa_circ_0041103	hsacirc_001595	2	4	0	0	-Inf	0.635054	1
hsa_circ_0007701	hsacirc_004075	2	4	0	0	-Inf	0.635054	1
hsa_circ_0041234	hsacirc_013739	2	4	0	0	-Inf	0.635054	1
hsa_circ_0041462	hsacirc_020295	2	4	0	0	-Inf	0.635054	1
-	hsacirc_020157	2	4	0	0	-Inf	0.635054	1
hsa_circ_0002854	hsacirc_015645	2	4	0	0	-Inf	0.635054	1
hsa_circ_0000779	hsacirc_012643	2	4	0	0	-Inf	0.635054	1
hsa_circ_0003871	hsacirc_020338	2	4	0	0	-Inf	0.635054	1
hsa_circ_0006806	hsacirc_016145	2	4	0	0	-Inf	0.635054	1
hsa_circ_0046085	hsacirc_017637	2	4	0	0	-Inf	0.635054	1
-	hsacirc_002223	2	4	0	0	-Inf	0.635054	1
hsa_circ_0008041	hsacirc_010748	2	4	0	0	-Inf	0.635054	1
hsa_circ_0046432	hsacirc_003892	2	4	0	0	-Inf	0.635054	1
-	hsacirc_003468	2	4	0	0	-Inf	0.635054	1
hsa_circ_0007117	hsacirc_006471	2	4	0	0	-Inf	0.635054	1
hsa_circ_0047702	hsacirc_000011	2	4	0	0	-Inf	0.635054	1
-	hsacirc_012770	2	4	0	0	-Inf	0.635054	1
hsa_circ_0006209	hsacirc_008345	2	4	0	0	-Inf	0.635054	1
hsa_circ_0003652	hsacirc_008066	2	4	0	0	-Inf	0.635054	1
-	hsacirc_000912	2	4	0	0	-Inf	0.635054	1
hsa_circ_0049698	hsacirc_006630	2	4	0	0	-Inf	0.635054	1
hsa_circ_0050386	hsacirc_010664	2	4	0	0	-Inf	0.635054	1
hsa_circ_0005325	hsacirc_010905	2	4	0	0	-Inf	0.635054	1
hsa_circ_0051081	hsacirc_004109	2	4	0	0	-Inf	0.635054	1
hsa_circ_0003312	hsacirc_005302	2	4	0	0	-Inf	0.635054	1
hsa_circ_0051718	hsacirc_020188	2	4	0	0	-Inf	0.635054	1
hsa_circ_0051855	hsacirc_006935	2	4	0	0	-Inf	0.635054	1
hsa_circ_0048965	hsacirc_014367	2	4	0	0	-Inf	0.635054	1
-	hsacirc_008471	2	4	0	0	-Inf	0.635054	1
hsa_circ_0006946	hsacirc_008610	2	4	0	0	-Inf	0.635054	1
-	hsacirc_005279	2	4	0	0	-Inf	0.635054	1
hsa_circ_0008712	hsacirc_006298	2	4	0	0	-Inf	0.635054	1
hsa_circ_0056249	hsacirc_020199	2	4	0	0	-Inf	0.635054	1
hsa_circ_0056264	hsacirc_016227	2	4	0	0	-Inf	0.635054	1
-	hsacirc_004004	2	4	0	0	-Inf	0.635054	1
hsa_circ_0056577	hsacirc_015452	2	4	0	0	-Inf	0.635054	1
-	hsacirc_009849	2	4	0	0	-Inf	0.635054	1
hsa_circ_0058493	hsacirc_007691	2	4	0	0	-Inf	0.635054	1
hsa_circ_0058514	hsacirc_006657	2	4	0	0	-Inf	0.635054	1
hsa_circ_0004079	hsacirc_015802	2	4	0	0	-Inf	0.635054	1
hsa_circ_0052963	hsacirc_008250	2	4	0	0	-Inf	0.635054	1
hsa_circ_0002025	hsacirc_004475	2	4	0	0	-Inf	0.635054	1
hsa_circ_0054178	hsacirc_007995	2	4	0	0	-Inf	0.635054	1
-	hsacirc_007798	2	4	0	0	-Inf	0.635054	1
hsa_circ_0003990	hsacirc_009048	2	4	0	0	-Inf	0.635054	1
hsa_circ_0054318	hsacirc_013878	2	4	0	0	-Inf	0.635054	1
-	hsacirc_000310	2	4	0	0	-Inf	0.635054	1
hsa_circ_0006251	hsacirc_007289	2	4	0	0	-Inf	0.635054	1
-	hsacirc_014385	2	4	0	0	-Inf	0.635054	1
-	hsacirc_002746	2	4	0	0	-Inf	0.635054	1
-	hsacirc_008549	2	4	0	0	-Inf	0.635054	1
-	hsacirc_004430	2	4	0	0	-Inf	0.635054	1
hsa_circ_0060522	hsacirc_006460	2	4	0	0	-Inf	0.635054	1
hsa_circ_0005573	hsacirc_000348	2	4	0	0	-Inf	0.635054	1
hsa_circ_0060819	hsacirc_017968	2	4	0	0	-Inf	0.635054	1
-	hsacirc_013736	2	4	0	0	-Inf	0.635054	1
hsa_circ_0001172	hsacirc_009287	2	4	0	0	-Inf	0.635054	1
hsa_circ_0061099	hsacirc_017158	2	4	0	0	-Inf	0.635054	1
hsa_circ_0062762	hsacirc_017894	2	4	0	0	-Inf	0.635054	1
-	hsacirc_006718	2	4	0	0	-Inf	0.635054	1
hsa_circ_0004639	hsacirc_004555	2	4	0	0	-Inf	0.635054	1
-	hsacirc_010673	2	4	0	0	-Inf	0.635054	1
-	hsacirc_018453	2	4	0	0	-Inf	0.635054	1
hsa_circ_0007841	hsacirc_020146	2	4	0	0	-Inf	0.635054	1
-	hsacirc_008665	2	4	0	0	-Inf	0.635054	1
-	hsacirc_011221	2	4	0	0	-Inf	0.635054	1
-	hsacirc_013919	2	4	0	0	-Inf	0.635054	1
hsa_circ_0067572	hsacirc_012868	2	4	0	0	-Inf	0.635054	1
-	hsacirc_010915	2	4	0	0	-Inf	0.635054	1
-	hsacirc_013486	2	4	0	0	-Inf	0.635054	1
-	hsacirc_016319	2	4	0	0	-Inf	0.635054	1
hsa_circ_0007854	hsacirc_015936	2	4	0	0	-Inf	0.635054	1
-	hsacirc_015951	2	4	0	0	-Inf	0.635054	1
hsa_circ_0068135	hsacirc_020061	2	4	0	0	-Inf	0.635054	1
hsa_circ_0008639	hsacirc_009504	2	4	0	0	-Inf	0.635054	1
hsa_circ_0005367	hsacirc_010836	2	4	0	0	-Inf	0.635054	1
hsa_circ_0066305	hsacirc_009627	2	4	0	0	-Inf	0.635054	1
hsa_circ_0001988	hsacirc_015299	2	4	0	0	-Inf	0.635054	1
hsa_circ_0001319	hsacirc_003800	2	4	0	0	-Inf	0.635054	1
hsa_circ_0002006	hsacirc_007910	2	4	0	0	-Inf	0.635054	1
hsa_circ_0008610	hsacirc_017485	2	4	0	0	-Inf	0.635054	1
hsa_circ_0001449	hsacirc_001101	2	4	0	0	-Inf	0.635054	1
-	hsacirc_000966	2	4	0	0	-Inf	0.635054	1
hsa_circ_0069559	hsacirc_016945	2	4	0	0	-Inf	0.635054	1
hsa_circ_0006681	hsacirc_014911	2	4	0	0	-Inf	0.635054	1
hsa_circ_0069981	hsacirc_019144	2	4	0	0	-Inf	0.635054	1
hsa_circ_0070245	hsacirc_001742	2	4	0	0	-Inf	0.635054	1
hsa_circ_0002221	hsacirc_003713	2	4	0	0	-Inf	0.635054	1
-	hsacirc_014456	2	4	0	0	-Inf	0.635054	1
hsa_circ_0070396	hsacirc_007091	2	4	0	0	-Inf	0.635054	1
-	hsacirc_007403	2	4	0	0	-Inf	0.635054	1
hsa_circ_0005608	hsacirc_010700	2	4	0	0	-Inf	0.635054	1
hsa_circ_0074081	hsacirc_019789	2	4	0	0	-Inf	0.635054	1
-	hsacirc_011178	2	4	0	0	-Inf	0.635054	1
-	hsacirc_019661	2	4	0	0	-Inf	0.635054	1
hsa_circ_0006694	hsacirc_017214	2	4	0	0	-Inf	0.635054	1
hsa_circ_0074736	hsacirc_008557	2	4	0	0	-Inf	0.635054	1
hsa_circ_0009145	hsacirc_009765	2	4	0	0	-Inf	0.635054	1
hsa_circ_0074875	hsacirc_003153	2	4	0	0	-Inf	0.635054	1
-	hsacirc_017080	2	4	0	0	-Inf	0.635054	1
-	hsacirc_012030	2	4	0	0	-Inf	0.635054	1
-	hsacirc_009266	2	4	0	0	-Inf	0.635054	1
hsa_circ_0075366	hsacirc_004814	2	4	0	0	-Inf	0.635054	1
-	hsacirc_005622	2	4	0	0	-Inf	0.635054	1
hsa_circ_0072410	hsacirc_019325	2	4	0	0	-Inf	0.635054	1
hsa_circ_0072425	hsacirc_003212	2	4	0	0	-Inf	0.635054	1
-	hsacirc_008595	2	4	0	0	-Inf	0.635054	1
hsa_circ_0009162	hsacirc_011805	2	4	0	0	-Inf	0.635054	1
-	hsacirc_008747	2	4	0	0	-Inf	0.635054	1
hsa_circ_0073486	hsacirc_003714	2	4	0	0	-Inf	0.635054	1
-	hsacirc_015518	2	4	0	0	-Inf	0.635054	1
hsa_circ_0007828	hsacirc_001278	2	4	0	0	-Inf	0.635054	1
hsa_circ_0007317	hsacirc_008209	2	4	0	0	-Inf	0.635054	1
hsa_circ_0078364	hsacirc_002342	2	4	0	0	-Inf	0.635054	1
-	hsacirc_013547	2	4	0	0	-Inf	0.635054	1
hsa_circ_0006232	hsacirc_004910	2	4	0	0	-Inf	0.635054	1
-	hsacirc_002423	2	4	0	0	-Inf	0.635054	1
hsa_circ_0007982	hsacirc_001881	2	4	0	0	-Inf	0.635054	1
-	hsacirc_017755	2	4	0	0	-Inf	0.635054	1
hsa_circ_0003814	hsacirc_014981	2	4	0	0	-Inf	0.635054	1
-	hsacirc_002823	2	4	0	0	-Inf	0.635054	1
-	hsacirc_007144	2	4	0	0	-Inf	0.635054	1
hsa_circ_0081888	hsacirc_011130	2	4	0	0	-Inf	0.635054	1
hsa_circ_0081892	hsacirc_005747	2	4	0	0	-Inf	0.635054	1
hsa_circ_0082306	hsacirc_000429	2	4	0	0	-Inf	0.635054	1
hsa_circ_0005923	hsacirc_004602	2	4	0	0	-Inf	0.635054	1
hsa_circ_0001680	hsacirc_015230	2	4	0	0	-Inf	0.635054	1
hsa_circ_0001671	hsacirc_001571	2	4	0	0	-Inf	0.635054	1
-	hsacirc_002876	2	4	0	0	-Inf	0.635054	1
hsa_circ_0005017	hsacirc_004247	2	4	0	0	-Inf	0.635054	1
-	hsacirc_008802	2	4	0	0	-Inf	0.635054	1
-	hsacirc_007242	2	4	0	0	-Inf	0.635054	1
-	hsacirc_020283	2	4	0	0	-Inf	0.635054	1
hsa_circ_0005588	hsacirc_004801	2	4	0	0	-Inf	0.635054	1
hsa_circ_0005515	hsacirc_010241	2	4	0	0	-Inf	0.635054	1
hsa_circ_0008548	hsacirc_013078	2	4	0	0	-Inf	0.635054	1
-	hsacirc_000592	2	4	0	0	-Inf	0.635054	1
-	hsacirc_016897	2	4	0	0	-Inf	0.635054	1
-	hsacirc_013439	2	4	0	0	-Inf	0.635054	1
hsa_circ_0085756	hsacirc_013318	2	4	0	0	-Inf	0.635054	1
hsa_circ_0007521	hsacirc_004918	2	4	0	0	-Inf	0.635054	1
hsa_circ_0085768	hsacirc_002783	2	4	0	0	-Inf	0.635054	1
hsa_circ_0002162	hsacirc_001327	2	4	0	0	-Inf	0.635054	1
-	hsacirc_003101	2	4	0	0	-Inf	0.635054	1
hsa_circ_0083789	hsacirc_007492	2	4	0	0	-Inf	0.635054	1
hsa_circ_0006376	hsacirc_004773	2	4	0	0	-Inf	0.635054	1
hsa_circ_0005403	hsacirc_011254	2	4	0	0	-Inf	0.635054	1
hsa_circ_0084499	hsacirc_015000	2	4	0	0	-Inf	0.635054	1
-	hsacirc_016089	2	4	0	0	-Inf	0.635054	1
hsa_circ_0085077	hsacirc_005761	2	4	0	0	-Inf	0.635054	1
hsa_circ_0085096	hsacirc_009821	2	4	0	0	-Inf	0.635054	1
hsa_circ_0008050	hsacirc_012951	2	4	0	0	-Inf	0.635054	1
hsa_circ_0088300	hsacirc_019175	2	4	0	0	-Inf	0.635054	1
hsa_circ_0088389	hsacirc_003019	2	4	0	0	-Inf	0.635054	1
hsa_circ_0088404	hsacirc_017998	2	4	0	0	-Inf	0.635054	1
hsa_circ_0088435	hsacirc_006179	2	4	0	0	-Inf	0.635054	1
hsa_circ_0002675	hsacirc_000242	2	4	0	0	-Inf	0.635054	1
hsa_circ_0089393	hsacirc_002624	2	4	0	0	-Inf	0.635054	1
-	hsacirc_016978	2	4	0	0	-Inf	0.635054	1
-	hsacirc_005079	2	4	0	0	-Inf	0.635054	1
-	hsacirc_002337	2	4	0	0	-Inf	0.635054	1
-	hsacirc_013984	2	4	0	0	-Inf	0.635054	1
-	hsacirc_011749	2	4	0	0	-Inf	0.635054	1
hsa_circ_0007367	hsacirc_009734	2	4	0	0	-Inf	0.635054	1
hsa_circ_0086329	hsacirc_012402	2	4	0	0	-Inf	0.635054	1
-	hsacirc_008789	2	4	0	0	-Inf	0.635054	1
-	hsacirc_011199	2	4	0	0	-Inf	0.635054	1
-	hsacirc_011167	2	4	0	0	-Inf	0.635054	1
hsa_circ_0087392	hsacirc_019603	2	4	0	0	-Inf	0.635054	1
-	hsacirc_012944	2	4	0	0	-Inf	0.635054	1
hsa_circ_0091364	hsacirc_012693	2	4	0	0	-Inf	0.635054	1
-	hsacirc_009487	2	4	0	0	-Inf	0.635054	1
hsa_circ_0001913	hsacirc_010170	2	4	0	0	-Inf	0.635054	1
hsa_circ_0007626	hsacirc_006332	6.5	10	3	0.3	-1.73697	0.635716	1
hsa_circ_0008250	hsacirc_002275	6.5	10	3	0.3	-1.73697	0.635716	1
hsa_circ_0001098	hsacirc_014988	6.5	10	3	0.3	-1.73697	0.635716	1
hsa_circ_0001458	hsacirc_018074	6.5	10	3	0.3	-1.73697	0.635716	1
hsa_circ_0083756	hsacirc_014277	6.5	10	3	0.3	-1.73697	0.635716	1
hsa_circ_0003726	hsacirc_004618	6.5	10	3	0.3	-1.73697	0.635716	1
hsa_circ_0007100	hsacirc_014184	6.5	10	3	0.3	-1.73697	0.635716	1
hsa_circ_0007001	hsacirc_003794	20.4167	27.3333	13.5	0.493902	-1.0177	0.636424	1
hsa_circ_0008287	hsacirc_019031	7.25	4	10.5	2.625	1.39232	0.636962	1
hsa_circ_0001083	hsacirc_017148	7.25	4	10.5	2.625	1.39232	0.636962	1
[truncated: 2,497 more rows]
