# Supplementary material for: The regulation of hsacirc_004413 promotes proliferation and drug resistance of gastric cancer cells by acting as a competing endogenous RNA for miR-145-5p
Source: PeerJ. 2022 Apr 7;10:e12629. doi: 10.7717/peerj.12629 (PMC8995023; doi:10.7717/peerj.12629)
Supplement: Supplemental Information 8 [file peerj-10-12629-s008.xlsx]

## Sheet: Sheet1
circBase_ID	id	SourceGene	Chromosome	Start Site	End Site	Direction	Length	Name	GO	KEGG	EC	eggNOG	eggNOG_Class	Description	NCBI_GI	UniProtID
hsa_circ_0004650	hsacirc_004413	ENSG00000179715	12	47079603	47236662	+	2618	PCED1B	GO:0005515;GO:0005515;	-	-	NOG83787	-	PC-esterase domain containing 1B [Source:HGNCSymbol;Acc:HGNC:28255]	91523	Q96HM7;A0A024R115
